# Supplementary material for: Projecting Antarctica's contribution to future sea level rise frombasal ice-shelf melt using linear response functions of 16 ice sheetmodels (LARMIP-2)
Source: Copernicus journal article supplement (doi:10.5194/esd-2019-23), 2019-05-23
Supplement: Supplementary file [file esd-2019-23-AC1-supplement.pdf]

## Response to reviewers

5 *We would like to thank the reviewers for the very constructive criticism of our manuscript and are glad that they consider the study in principle worthy for publication in ESD. We were able to address all requests including those of an extensive additional review by Daniel Gilford. These reviews have considerably improved the manuscript for which we are grateful.*

*In particular, we have added a comparison of the projections to existing projections of the sea level contribution for Antarctica (as requested by both reviewer's and Daniel Gilford), a more extensive discussion of the results and methods and a more explicit description of the procedure used for projections.*

10 *In order to facilitate the reading of this document, responses to the reviewers are given in blue and italic compared to the reviewer comments which are given in black without italic font.*

### Response to reviewer #1

15 In this manuscript, the authors use the linear impulse-response model previously presented in Levermann et al. (2014) to fit Antarctic ice sheet simulations from sixteen different ice sheet models, allowing the construction of a simple statistical emulator of these models' behavior in five aggregate ice-sheet sectors. This is a useful tool for producing future probabilistic sea-level projections.

*Response:* *We are happy that the author sees value in the overall approach.*

20 It is, however, somewhat regrettable that the paper does not give more attention to at least attempting to explain the differences among ice-sheet responses – the differences among models that can be observed in figures 4 and 5 are stark, and some discussion would be very welcome. As just one example, there are major differences among models in the amount of high-frequency variability, and an attempt to put some explanatory taxonomy on these differences would be extremely useful.

25 What are we to take away from the GCMs with poor fits and long delays (e.g., IPSLCM5A-MR and MRI-CGCM3)? Is it valid to include these in projecting the forcing? It would be helpful to have supplemental figures showing the underlying data. It would also be useful to have some quantitative measure of the quality of the linear response approximation for each ice sheet model. This can be eyeballed from Figure 4, but it'd be better to have an objective metric.

30 *Response:* *We agree with the reviewer that a discussion of the differences between the models is highly desirable. We have added a discussion of the relation of each model to the overall performance of the models together with a possible explanation to section 4. A really deep analysis would be most desirable but is also incredibly hard to do for 16 models at once. We hope that the reviewer finds the discussion somewhat useful and agrees that the comparison of the results in the figures and tables bears*  
35 *some value for the reader on its own.*

Structurally and stylistically, the paper has some significant flaws that hinder its comprehensibility.

40 Most importantly, the paper clearly expects the reader to have recently read Levermann et al 2014. While I understand the authors' desire not to be repetitive, the paper needs to be comprehensible on its own. A clear summary of the assumptions and approach of Levermann et al 2014 needs to be provided early on. The second half of section 2.4, which provides the equations underlying the statistical

emulator, comes way too late – the structure of the emulator needs to be clearly described first, followed by a clear description of the calibration, and then followed by a clear description of the projection method. The current version is all tangled together.

5 *Response:* *We would like to thank the reviewer for highlighting this omission. We thought it would be best not to be too repetitive, but have now expanded the explanation in the method section 2.*

In the discussion, I would encourage the authors to contextualize their results based on other available information. For example, the structured expert judgement study of Bamber et al. (2019, 10.1073/pnas.1817205116) might provide useful context.

10 *Response:* *We fully agree and have added a discussion of the existing sea level and ice sheet projections literature for context.*

The authors' tone is also peculiarly (and conversationally) beseeching and apologetic. It is important for the authors to be clear about the limitations of the approach, but polite imperatives ("Please note this", 15 "Please note that") are excessively circuitous; the authors should just state what they wish the reader to note (and do it in a place that makes logical sense, given the flow of the paper).

*Response:* *As the style of the writing is a matter of personal taste, I would appreciate if that was not part of the review process since it bears no scientific content. In order to oblige I have however eliminated all "pleases" from the text.*

20

On page 10, the last paragraph seems a bit excessive given the decision not to weight the different models. I would either drop the equation and keep only a qualitative discussion of model weighting, or (perhaps better) do a sensitivity study using model weighting.

25 *Response:* *We agree and have reduced the paragraph and shifted it into the comparison of the hindcast with observations, in order to provide some discussion for readers that wonder why there is no weighting.*

The paper is also missing a proper conclusion. A paragraph explaining the decision not to weight is a peculiar way to conclude.

30 *Response:* *We fully agree with the reviewer and have added an overall conclusion together with a discussion of the existing sea level projection literature.*

Figure 1: "intervall" -> "interval"

*Response:* *Done.*

35 Tables 11 and 12 have no units.

*Response:* *The units were given in the caption. Upon production we will conform to the journals convention on this.*

## Response to reviewer #2

5 The study uses a linear response function method earlier used by (Levermann et al. 2014) to estimate the basal melting of ice sheet models in response to a range of external forcing from anthropogenic emissions. Instead of 5 ice sheet models used in the earlier study, it has been extended to 16 Ice sheet models. Though the methodology was adopted earlier, it would be interesting to understand the response across the many state-of-the-art ice sheet models.

Below are the general and specific comments.

### General Comments:

10 1. The authors expect the reader to have a clear understanding of Levermann et al. 2014. A summary of the work would be excellent.

*Response: We fully agree and provide more explanation of the methodology used in Levermann et al. 2014 and have added a discussion and comparison of the results in the previous paper to the discussion and conclusion section.*

15

2. Some details in the abstract are not referenced in the text, e.g., the Paris Agreement (citation and a brief description would be excellent)

20 *Response: We have tried to fix this omission and hope that there are no more details in the abstract that are not referenced in the text anymore. In particular the Paris Agreement is now referenced in the introduction.*

3. Section 2.6 Validity of Linearity assumption.” The authors fail to clarify upon what they mean by “The alpha values are generally close to zero, which represent linearity.”

*Response: Thanks for pointing this out. We have added a longer explanation.*

25

### Line-by-line comments:

Page 2 Line 19: “For the so-called business-as-unusual..” - please rephrase

*Response: Rephrased into “For the unabated warming path, RCP-8.5,...”*

30 Page 2 Line 23: “Paris Climate Agreement” - Missing citation. Do not see any reference related to this later in the text.

*Response: Done.*

Page 3 Line 7: Clausius-Clapeyron law - missing citation

*Response: References were added.*

Page 3 Line 28-29: “The advantage here is that we can investigate the response of the models to the full range of uncertain forcing and combine this for all the different ice sheet models. That is the main contribution this study is trying to make” – Please combine the sentences.

*Response: Done.*

5 Page 3 Line 30: In addition - missing comma

*Response: Added in all places where it was missing.*

Page 3 Line 33: “It is important to note that in this study” - missing comma

*Response: I am not sure a comma is missing. I will wait for the proof readers if that is alright?*

10 Page 3 Line 35: “In any case whenever the term Antarctic contribution to sea-level rise is used this refers to the sea-level relevant ice loss induced from basal ice shelf melting only.” - please rephrase may be “In this study, ..”

*Response: Done.*

Page 3 Line 40: “The only thing that changed is the ice sheet models.” – Unclear sentence

*Response: Done.*

15 Page 4 Line 21-23: “Although there are other possibilities, this approach preserves the forcing structure as provided by the ocean models which is why we selected it.” - please rephrase

*Response: Done.*

20 Page 5 Line 37-38: Does it mean that the configuration was set up for each region illustrated in Figure 2. rather than the whole region of the Antarctic and presenting results for various sectors? If for each region, then what about the influence of boundaries between the regions?

*Response: We have added a discussion on this.*

Page 6 Line 2: “A number of modeling groups ...” - please include citations, a brief description about the modeling groups; Page 6 Line 3: “... beyond the scope” - it would be nice to have a brief description with citations.

25 *Response: In order to make this feasible we decided to provide all data of the simulations as supplementary information to the manuscript. Description in the paper would add a number of additional figures which would increase the number of figures even more. I hope the reviewer can agree to this procedure.*

Page 6 Line 8: “That however might sound worse than it is.” - please rephrase

30 *Response: Done.*

Page 7 Line 11: “The alpha values are, however, generally close to zero, which represents linearity” - Any references to substantiate the assumption or what does the author mean by saying “generally close to zero.”

35 *Response: We have omitted this statement and replaced it by an assessment of the linearity assumption. This might be better since the alpha values are given in the figures. It is thus easiest for the reader to directly compare the alpha values with the corresponding deviations of the linearity assumption from the model simulations. Thanks for the note.*

Page 7 Line 21: “While some models show an instantaneous ice loss response, most models exhibit a more gradual increase of the ice loss over time.” - Please include a bit more detail, which is which.

*Response: We have added examples.*

Page 8 Line 3 “are started” - were started

5 *Response: Done.*

Page 8 Line 10-14: Isn't it better use the model estimates that fall within the uncertainty range of observation to derive conclusions? Can you substantiate the reason for using all the models? It would be nice to see the total from the models whose estimates fall within the uncertainty range of observation.

10 *Response: We have added an explanation both in this section and also in the conclusion as of why modelling the observed sea level contribution from Antarctica is not a good indicated for a successful projection of the future.*

Page 8 Lin 31: “Overall” insert a comma

*Response: Done.*

15 Page 9 Line 39: “... compared to what might occur in reality.” It would be nice to include details on some other studies for comparison.

*Response: We have added a longer discussion of the models and also of other studies.*

## Response to Daniel Gilford's comments

This study uses a linear response function method to estimate the basal melting of 16 ice sheet models in response to a range of external forcing from anthropogenic emissions. The study is relatively novel using a recently published methodology (Levermann et al. 2014) to explore basal melt across the many state-of-the-art ice sheet models, and is a natural follow up on that work. The authors succinctly describe their methods and results, and promisingly find relatively good agreement between models and with observations. I have only a few substantive comments which I hope the authors will consider. They relate to the motivational and concluding discussions, and the need for more detailed statistical analyses of the linear assumption; my other comments concern methodological clarity or are grammatical. In my estimation this study will be a valuable addition to the literature.

*Response: We are happy about the overall approval of the methodology and results.*

### General Comments:

1. The abstract and conclusions provide new information to the reader that are not discussed throughout the rest of the paper, which detracts from the study. In the case of the abstract, the Paris agreement is mentioned without being discussed in the main text, and the method's structural uncertainty limitation isn't discussed anywhere except in the abstract. It would be helpful discuss these somewhere in the paper itself, or removed from the abstract. It is also confusing that a new methodology is specifically introduced in the discussion section (pg. 10, line 15). I would suggest introducing it earlier in the paper (section 3) where the model is compared against observational trends, and then simply noting the method (without the equation) in the concluding section.

*Response: We have added the uncertainty discussion of the abstract in the discussion section and the Paris Climate Agreement in the introduction. Further we have moved the methodology of the weighting procedure to section 3. These are important suggestions by the reviewer which have improved the manuscript.*

2. One of the more compelling sentences in the abstract discussed how this study will be used to explore the range of responses to the external climate system forcing. But that motivation/wording isn't found in the introduction, which is a missed opportunity. The paper would be improved if a paragraph which more strongly motivated this work was written, becoming the second paragraph of section 1.

*Response: We have added such a paragraph in the introduction.*

3. Section 2.3 and pg. 5, lines 22-34: While the criteria for choosing 8 m/yr was explained here, the way this section is currently written doesn't provide a clear explanation of what the 8 m/yr value is trying to accomplish and why a specific melt rate was selected in the first place. This makes the method sections on the response function difficult to follow. A few sentences are needed to clarify and describe how the 8 m/yr value is used to derive the response function, and then connected to how those functions are used along with the range of melting rates in Figure 3 to derive sea level contributions. It will be helpful to methodically explain what the "switch-on" experiments are, and how they relate to the timeseries of melt rates found.

*Response: We have added an explanation to the end of the section. Thanks for the hint.*

4. In pg. 7, lines 11-14: Is there any way to discuss and quantify how close "generally close" is, maybe with some statistical test? It seems that as alpha approaches 0 or 1, you are off by a factor of 2 or more, which probably does not constitute linearity. How was the range -1 to 2 chosen? A theoretically supported statistical test for linearity would be helpful for making sense of the results.

*Response: We have changed this paragraph in response to reviewer #2's comment. It was not well put, we agree.*

5. Section 3 and Figures 6-7: How do these observations compare with the modelled changes over individual regions?

*Response: This has to be part of another study, I am afraid. We will provide the data for later studies.*

6. A concluding paragraph noting the importance and novelty of this work—for understanding the uncertainties in ice-sheet response to uncertainties in external forcing—would improve the manuscript. Moreover, the importance of human decisions (i.e. their role in driving external forcing and its uncertainties) should be emphasized.

*Response: We have added a conclusion to the end of the paper.*

10 Line-by-line comments:

Pg. 2, Line 4: This sentence reads a bit odd, can it be rewritten for clarity?

*Response: Done.*

Lines 5-6: This sentence might be better suited towards the end of the abstract, or just in main text of the paper. Noting the limitations here in the abstract disrupts the flow of what it is trying to highlight and the study goals. In contrast, the limitations discussed in the following sentences seem more pertinent to the study goals.

*Response: We would like to keep the sentence there.*

Line 23: To my knowledge, the total contributions from the Paris Agreement could put the world on track to 3 degrees of warming or more, although ratcheting down emissions and could reduce this. In contrast the stated goal of the Paris agreement is "well below 2 degrees". I suggest either adding this language of "goal", or removing this from the abstract. Moreover, the Paris agreement is not mentioned anywhere else in the manuscript, so it may be appropriate to either cut it altogether or add more details to the main text. Line 26: Remove "the" before "five Antarctic regions". The reader doesn't yet have familiarity with which 5 regions are being referred to; this is good opportunity to let them know that you are using five regions.

*Response: We have added a reference and a reference to the discussion of the agreement.*

Line 26-27: "rate" should be "rates", "is" should be "are"

*Response: We would like to keep it as it is.*

Pg. 3, line 17: remove "a"

30 *Response: We would like to keep it as it is.*

Line 18: "will be" should be "is"

*Response: Done.*

Line 20: I suggest removing the line about repeating the method. This comment could be left to section 2, and "try not" reads rather casual and should be rewritten.

35 *Response: Done.*

Line 29: I suggest removing this casual line about the contribution the paper is "trying to make".

Response: Done.

Line 35: “This will be pointed out: : :” should be removed.

Response: Done.

Line 36: This sentence is helpful! A useful detail which sets up the next section nicely.

5 Response: Thanks.

Lines 38 and 39: “precisely” probably isn’t necessary here.

Response: Removed.

10 Line 40: This sentence about “the only thing that changed” is casual and not very descriptive. I suggest rewriting as: “The only difference between our study and the previous one are the ice sheet models used to project ice-sheet changes and sea level rise contributions.”

Response: Done.

15 Pg. 4, line 1: Please replace “carbon dioxide concentration” with something like “emission pathways”. My understanding is that RCP scenarios are in carbon dioxide equivalent, including not only CO2 but also other GHGs and constituents (and their forcings), which differ not only in concentrations but substance between each pathway.

Response: We know and understand but it would be rather tedious to go into this here. Especially since RCPs are NOT emission pathways which would make it much less precise.

Line 4: remove “the”

Response: We would like to keep it as it is.

20 Line 10: Are the samples in this bulk approach approximately equally distributed among all ice-sheet models? This could affect the results of Figure 7, for instance, because the weighting towards some models might bias the results (cf. Figure 6 where there are clear differences between different models).

Response: No weighting was applied.

25 Line 13: “different”: : : is each timeseries drawn "without replacement"? Are any random selections repeated in your 20,000 samples?

Response: In each step the time series is newly selected from the same ensemble. We believe that should be clear here.

Line 23: replace “now given” with “given below”.

Response: Done.

30 Line 25: This introduction to RCPs is probably unnecessary, as they were introduced above in lines 1-2.

Response: We would like to keep it as it is.

Pg. 5, lines 33-34: This sentence reads very awkwardly. I recommend rewriting this sentence for clarity as, “This is the most balanced choice to span the range of simulations, with 4 m/yr being too low for



most of the RCP-8.5 scenario and 16 m/yr being too high for the majority of scenarios and ensemble samples.”

*Response: Done.*

Line 37: can you add “(described in appendix A)” after “ice sheet models.”?

5 *Response: Done.*

Line 37 and section 2.5: This paragraph seems out of place as its own section, being relatively short and quite necessary for the discussion at the beginning of section 2.4 I recommend removing section 2.5 altogether, and moving its context/text to wrap into and support the first few sentences of section 2.4.

*Response: This needs to stay for completeness.*

10 Line 37: There are switches between past and present tense throughout. Can you choose one and be consistent in the manuscript?

*Response: Done.*

Pg. 6, line 3: The start of this sentence could be rewritten for clarity as, “Although these simulations are highly interesting, a full discussion of their results...”

15 *Response: Done.*

Line 6: remove the redundant “the uncertainty in.”

*Response: Done.*

Line 22: please add “,  $A_{\mu}(t)$ ,” after “the observed response” to note the equation terms.

*Response: Done.*

20 Line 24: This section is a bit difficult to follow. I suggest removing “the response function is obtained” and adding a sentence like, “Following this procedure and using the fixed Heavyside forcing  $\mu=8\text{m/yr}$  chosen above, we obtain the response functions for each of the ice-sheet models.”

*Response: Done in a slightly different way.*

25 Line 38: I suggest rewriting “for the 200 years of the forcing period” as “which is held constant over 200 years.”

*Response: Done.*

Pg. 7, line 25-26: “but not that far off in most cases” is rather general. A short but descriptive finish to this sentence would improve and contextualize this paragraph. I suggest rewriting as: “but in most cases the assumption is a reasonable approximation of how basal melting is responding to external forcing.”

30 *Response: Done.*

Pg. 8, line 7: “and” should be “with”

*Response: We would like to keep it as it is.*

Line 24: Increases in the ice-sheet associated with precipitation changes cannot be explicitly or implicitly accounted for in your linear response (this is apparent in the figures, as no changes are below

0). But observed ice-sheet changes over this period in the EAIS are increasing in mass. If they are not accounted for, could that also lead to differences between the estimates here and the observations? You mention this in the conclusions, but can you discuss this drawback and its implications in more detail in this section?

5 *Response: Done.*

Line 31: By “largest” do you refer to the median values?

*Response: We have added a bit more context here.*

Lines 35-36: This sentence is difficult to follow.

*Response: We have rephrased the sentence.*

10 Line 38: How are uncertainties distributed across the different regions, and why?

*Response: They are distributed according to Figure 3.*

Pg. 9, line 1: Is there a way to decompose equation 5 at each timestep to determine the relative importance of each component at each timestep?

15 *Response: This is not possible, unfortunately, because the convolution is non-local in time and therefore at each time step the history of the region matters.*

Line 6: “However” is redundant with your previous statement and I do not think is what you mean. Can you use something like “In any case”

*Response: Done.*

20 Pg. 11: Are the codes and data used to produce these analyses publicly available? Please provide to the extent possible, in accordance with the ESD data policy:

[https://www.earth-system-dynamics.net/about/data\\_policy.html](https://www.earth-system-dynamics.net/about/data_policy.html)

*Response: Will do.*

Figure 1 caption: It would be helpful to add the bold symbols for the basal melt rate and sensitivity, as was done for the other terms.

25 *Response: Done.*

Figure 4b-e captions: “Figure 3a” should be “Figure 4a”.

*Response: Done.*

Figure 5a: Please note that the response function are the grey lines.

*Response: Done.*

30 Tables 2-5: Are these coefficients the  $\alpha_r$  values? It would be helpful label them in the table with their symbol and describe them in words in the caption.

*Response: Done.*

# Projecting Antarctica's contribution to future sea level rise from basal ice-shelf melt using linear response functions of 16 ice sheet models (LARMIP-2)

Formatted: Space Before: 0 pt

Anders Levermann<sup>1,2,3,\*</sup>, Ricarda Winkelmann<sup>1,3</sup>, Torsten Albrecht<sup>1</sup>, Heiko Goelzer<sup>4,5</sup>, Nicholas R. Golledge<sup>6,7</sup>, Ralf Greve<sup>8</sup>, Philippe Huybrechts<sup>9</sup>, Jim Jordan<sup>10</sup>, Gunter Leguy<sup>11</sup>, Daniel Martin<sup>12</sup>, Mathieu Morlighem<sup>13</sup>, Frank Pattyn<sup>5</sup>, David Pollard<sup>14</sup>, Aurelien Quiquet<sup>15</sup>, Christian Rodehacke<sup>16,17</sup>, Helene Seroussi<sup>18,7</sup>, Johannes Sutter<sup>17,19</sup>, Tong Zhang<sup>20</sup>, Jonas Van Breedam<sup>9</sup>, Robert DeConto<sup>21</sup>, Christophe Dumas<sup>15</sup>, Julius Garbe<sup>1,3</sup>, G. Hilmar Gudmundsson<sup>10</sup>, Matthew J. Hoffman<sup>20</sup>, Angelika Humbert<sup>17,22</sup>, Thomas Kleiner<sup>17,8</sup>, William Lipscomb<sup>11</sup>, Malte Meinshausen<sup>23,1</sup>, Esmond Ng<sup>12</sup>, [Sophie M.J. Nowicki<sup>24</sup>](#), Mauro Perego<sup>25,4</sup>, Stephen F. Price<sup>20</sup>, Fuyuki Saito<sup>26,5</sup>, Nicole-Jeanne Schlegel<sup>18,7</sup>, Sainan Sun<sup>5</sup>, Roderik S.W. van de Wal<sup>4,27,6</sup>

<sup>1</sup> Potsdam Institute for Climate Impact Research, Potsdam, Potsdam, Germany

<sup>2</sup> LDEO, Columbia University, New York, USA

15 <sup>3</sup> Institute of Physics and Astronomy, University of Potsdam, Potsdam, 14476, Germany

<sup>4</sup> Institute for Marine and Atmospheric research Utrecht, Utrecht University, The Netherlands

<sup>5</sup> Laboratoire de Glaciologie, Université libre de Bruxelles (ULB), Brussels, Belgium

<sup>6</sup> Antarctic Research Centre, Victoria University of Wellington, Wellington 6140, New Zealand

<sup>7</sup> GNS Science, Avalon, Lower Hutt 5011, New Zealand

20 <sup>8</sup> Institute of Low Temperature Science, Hokkaido University, Sapporo 060-0819, Japan

<sup>9</sup> ~~DeEarth System Science & Departement Geografie, Vrije Universiteit Brussel, Brussels, Belgium~~ ~~Department of Geography, Vrije Universiteit Brussel, Brussels, Belgium~~

<sup>10</sup> Department of Geography and Environmental Sciences, University of Northumbria, Newcastle. UK.

<sup>11</sup> Climate and Global Dynamics Laboratory, National Center for Atmospheric Research, Boulder, CO, USA

25 <sup>12</sup> Lawrence Berkeley National Laboratory, Berkeley, CA, USA

<sup>13</sup> Department of Earth System Science, University of California Irvine, Irvine CA, USA

<sup>14</sup> Earth and Environmental Systems Institute, Pennsylvania State University, University Park, Pennsylvania, USA.

<sup>15</sup> Laboratoire des Sciences du Climat et de l'Environnement, CEA/CNRS-INSU/UVSQ, Gif-sur-Yvette Cedex, France

<sup>16</sup> Danish Meteorological Institute, Arctic and Climate, Copenhagen, Denmark

30 ~~<sup>17</sup> Jet Propulsion Laboratory, California Institute of Technology, Pasadena, CA, USA~~

<sup>17,8</sup> Alfred Wegener Institute Helmholtz Centre for Polar and Marine Research, Bremerhaven, Germany

~~<sup>18,7</sup> Jet Propulsion Laboratory, California Institute of Technology, Pasadena, CA, USA~~

<sup>19</sup> Physics Institute, University of Bern, Bern, Switzerland

35 <sup>20</sup> Theoretical Division, Los Alamos National Laboratory, Los Alamos, New Mexico, 87545, USA

<sup>21</sup> Department of Geosciences, University of Massachusetts, Amherst, Massachusetts, USA.

<sup>22</sup> Department of Geosciences, University of Bremen, Germany

<sup>23</sup> Climate & Energy College, School of Earth Sciences, University of Melbourne, Parkville, Victoria, Australia

<sup>24</sup> [NASA Goddard Space Flight Center, Greenbelt, MD, USA](#)

<sup>254</sup>Center for Computing Research, Sandia National Laboratories, Albuquerque, New Mexico, 87185, USA

<sup>265</sup>Japan Agency for Marine-Earth Science and Technology, Yokohama, Japan

<sup>276</sup>Geosciences, Physical Geography, Utrecht University, Utrecht, the Netherlands

*Correspondence to:* Anders Levermann (anders.levermann@pik-potsdam.de)

5 **Abstract.** The sea level contribution of the Antarctic ice sheet constitutes a large uncertainty in future sea level projections. Here we apply a linear response theory approach to 16 state-of-the-art ice sheet models to estimate the Antarctic ice sheet contribution from basal ice shelf melting within the 21<sup>st</sup> century. The purpose of this computation is to estimate the uncertainty ~~that arises from large uncertainty in the external forcing that future warming of Antarctica future contribution to global sea level rise that arises from large uncertainty in the oceanic forcing and the associated ice-self melting may exert~~  
10 ~~onto the ice sheet. While ice~~Ice-shelf melting is considered to be a major if not the largest perturbation of the ice sheet's flow into the ocean, ~~the~~However, by computing only the sea-level contribution in response to ice shelf melting, our ~~study~~approach is neglecting a number of processes such as surface-mass-balance related contributions ~~and mechanisms~~. In assuming linear response theory, we are able to capture complex temporal responses of the ice sheets, but we neglect any ~~self-dampening~~ or self-amplifying processes. This is particularly relevant in situations where an instability is dominating the  
15 ice loss. Results obtained here are thus relevant in particular wherever the ice loss is dominated by the forcing as opposed to an internal instability, for example in strong ocean warming scenarios. In order to allow for comparison the methodology was chosen to be exactly the same as in an earlier study (Levermann et al., 2014), but with 16 instead of 5 ice sheet models. We include uncertainty in the atmospheric warming response to carbon emissions (full range of CMIP-5 climate model sensitivities), uncertainty in the oceanic transport to the Southern Ocean (obtained from the time-delayed and scaled oceanic  
20 subsurface warming in CMIP-5 models in relation to the global mean surface warming) and the observed range of responses of basal ice shelf melting to oceanic warming outside the ice shelf cavity. This uncertainty in basal ice shelf melting is then convoluted with the linear response functions of each of the 16 ice sheet models to obtain the ice flow response to the individual global warming path. The model median for the observational period from 1992 to 2017 ~~of the ice loss due to basal ice shelf melting~~ is 109.26 mm with a likely range between 5.2 mm and 210.3 mm. ~~For the same period the Antarctic ice sheet compared to the observed sea level contribution from Antarctica of lost mass equivalent to~~ 7.4 mm ~~of global sea level rise~~ with a standard deviation of 3.7 mm (Shepherd et al., 2018) ~~including all processes, especially surface-mass-balance changes~~. For the ~~unabated so-called business-as-usual~~ warming path, RCP-8.5, we obtain a median contribution of the Antarctic ice sheet to global mean sea-level rise ~~from basal ice shelf melting~~ within the 21<sup>st</sup> century of 187 cm with a likely range (66-percentile around the mean) between 9 cm and 386 cm and a very likely range (90-percentile around the  
30 mean) between 6 cm and 5961 cm. For the RCP-2.6 warming path which will keep the global mean temperature below two degrees of global warming and is thus consistent with the Paris Climate Agreement ~~the procedure~~ yields a median of 143 cm of global mean sea-level contribution. The likely range for the RCP-2.6 scenario is between 77 cm and 275 cm and the very likely range is between 5 cm and 4039 cm. The structural uncertainties in the method do not allow an interpretation of any higher uncertainty percentiles. We provide projections for the five Antarctic regions and for each model and each scenario, separately. The rate of sea level contribution is highest under the RCP-8.5 scenario. The maximum within the 21<sup>st</sup> century of the median value is 4 cm per decade with a likely range between 2 cm/dec and 98 cm/dec and a very likely range between 1  
35 cm/dec and 143 cm/dec.

## 1 Introduction

The Antarctic ice sheet has been losing mass at an increasing rate over the past decades (Rignot et al., 2019; Shepherd et al., 2018). Projections of changes in ice loss from Antarctica still constitute the largest uncertainty in future sea level projections (Bamber et al., 2019; Bamber and Aspinall, 2013; Church et al., 2013; Schlegel et al., 2018; Slangen et al., 2016) (Bamber and Aspinall, 2013; Church et al., 2013; Schlegel et al., 2018; Slangen et al., 2016). Evidence from paleo records and regional and global climate models (Frieler et al., 2015; Lenaerts et al., 2016; Medley and Thomas, 2019; O’Gorman et al., 2012; Palerme et al., 2014, 2017; Previdi and Polvani, 2016) suggest that snowfall onto Antarctica follows a relation similar to the Clausius-Clapeyron law (Clapeyron, 1834; Clausius, 1850) of an increase by about 6% for every degree of global warming (Frieler et al., 2015; Lenaerts et al., 2016; Medley and Thomas, 2019; O’Gorman et al., 2012; Palerme et al., 2014, 2017; Previdi and Polvani, 2016). The current snowfall onto Antarctica is of the order of 8 mm/yr in global sea level equivalent, i.e. an increase in snowfall will decrease global sea level in the order of half a millimetre for every degree of warming (van de Berg et al., 2006; Lenaerts et al., 2012). Surface melting is likely to play a minor role as a direct ice loss mechanism within the 21<sup>st</sup> century, but it might initiate other ice loss processes such as hydrofracturing and subsequent cliff-calving with the potential for much higher ice loss than any other process (Deconto and Pollard, 2016; Pollard and DeConto, 2009). An important if not the most important process of additional ice loss from Antarctica is basal ice shelf melt and the associated acceleration of ice flow across the grounding line (Bindschadler et al., 2013; Jenkins et al., 2018; Nowicki et al., 2013, 2016; Reese et al., 2018a; Rignot et al., 2013; Shepherd et al., 2004).

Here we follow a very specific procedure that is designed to estimate the uncertainty of future ice loss from Antarctica as it can be induced by basal ice shelf melting. We follow exactly the same procedure as in (Levermann et al., 2014) but with 16 ice sheet models instead of three models with a dynamic representation of ice shelves (although five models participated in the earlier study, only three of them had a dynamic representation of ice shelves). At the core of the approach is a linear response theory (Good et al., 2011; Winkelmann and Levermann, 2013) which ~~will be~~ explained together with the models used in more detail in section 2. The ice sheet models used here all take part in the initMIP intercomparison project for Antarctica (Seroussi et al., 2019) within the overall ISMIP6 initiative (Goelzer et al., 2017; Nowicki et al., 2016). Section 3 provides the hindcasting for the observational period and section 4 gives the results of the computation for the 21<sup>st</sup> century. The last section provides conclusions and discussions. ~~Please Although note that we will try not to repeat details of the method in all its details aspects and refer to the earlier publication for that, we will summarize it in section 2 in order to provide a manuscript that is understandable on its own. Please also note that d~~Detailed analysis as to why the 16 different models respond differently cannot be provided in this publication both due to space limitations and due to the fact that each of this analysis would constitute a full scale publication in itself. We provide the synthesis of the results and refer to potential future studies by the individual modelling groups for details on the individual models’ results.

The purpose of this study is to estimate the uncertainty of basal-melt induced sea level contribution from Antarctica as it is caused by the uncertainty in the basal melt forcing. While ice-shelf melting is considered to be a major if not the largest perturbation of the ice sheet’s flow into the ocean, the approach is neglecting a number of processes such as surface-mass-balance related contributions and mechanisms. In assuming linear response theory, we are able to capture complex temporal responses of the ice sheets, but we neglect any self-dampening or self-amplifying processes. This is particularly relevant in situations where an instability is dominating the ice loss. Results obtained here are thus relevant in particular wherever the ice loss is dominated by the forcing as opposed to an internal instability, for example in strong warming scenarios.

In contrast to the study here, individual model simulations with specific time series of basal ice shelf forcing for a specific ice sheet model can be used much better to understand specific processes and yield much more precise results for this specific basal melt forcing. ~~The advantage here~~ main contribution of this study is that we can investigate the investigation of

the response of the models to the full range of uncertain forcing and combine this for all the different ice sheet models. ~~That is the main contribution this study is trying to make.~~ In addition, the switch-on experiments ~~at the basis of the analysis~~ allow for a comparison of the different models' responses to a very simple and generic forcing and might be used to improve the models or at least know how one specific models compares to the others in a specific region.

- 5 It is important to note that in this study no changes in the surface mass balance are taking into account, nor are any other ice loss processes other than the ice dynamic discharge into the ocean as it is induced from an increase in basal ice shelf melting. ~~This will be pointed out as much as possible. In any case w~~Whenever the term Antarctic contribution to sea-level rise is used in this study this refers to the sea-level relevant ice loss induced from basal ice shelf melting only.

## 2 Projecting procedure using linear response theory with forcing uncertainty

- 10 Here we follow ~~precisely~~ the same procedure to project the ice loss of Antarctica in response to basal ice shelf melting as described in (Levermann et al., 2014). In order to be able to compare to the previous results we use ~~precisely~~ the same forcing data. The only thing that changed is the ice sheet models that were used to compute the projections. All other aspects of the projections, i.e. the procedure and the data that were used to force the models are the same. We provide projections of the basal-melt-induced ice discharge from Antarctica for the four different carbon dioxide concentration scenarios (RCP-2.6, RCP-4.5, RCP-6.0, RCP-8.5 where RCP is short for Representative Concentration Pathway (Moss et al., 2010)). Here the RCP-8.5 scenario represents a future evolution with increasing carbon emissions as seen in the past decades while the RCP-2.6 scenario represents one possible path that keeps the Paris Climate Agreement (United Nations, 2015) under certain conditions and thus keeps the global mean temperature increase below two degrees of global warming (Schleussner et al., 2016).
- 20 In a nutshell the method follows the schematic in Figure 1: In order to provide a statistical estimate of the basal-melt induced sea-level contribution of Antarctica an ensemble of 20,000 basal-melt forcing time series for the ice sheet models is created. Instead of forcing each model with each of the 20,000 forcing time series, the modelling groups carried out a specific simulation with a constant additional basal-melt forcing of 8 m/yr which was switched on at the beginning of the experiment after initialization and then kept constant for 200 years. The time derivative of the resulting sea level response of the specific
- 25 ice sheet model within this experiment was used as a response function to a delta-distribution forcing of the ice sheet. Following the concept of a linear response theory this response function is convoluted with each of the forcing time series in order to estimate this ice-sheet model's response to this specific forcing time series. Hereby it is possible to provide estimates of the response of 16 ice sheet models to 20,000 different basal-melt forcing time series.
- 30 The ensemble of basal melt forcing time series was created as follows (Figure 1). Each ensemble member represents three random selections. First, a time series of the global mean temperature evolution from 1850 to 2100 is selected from an ensemble of 600 simulations of the MAGICC-6.0 emulator. These time series are all consistent with the observed warming path and the future carbon concentration pathway for which the sea-level projection is computed (i.e. RCP-2.6, 4.5, 6.0 or 8.5). Secondly, one of 19 CMIP-5 climate models is selected in order to obtain a relation between global mean surface warming and subsurface ocean warming which is forcing the Antarctic ice sheet. The subsurface ocean warming was
- 35 computed in the five different regions around Antarctica shown in Figure 2. In order to translate the global warming time series into a subsurface ocean warming time series for the different Antarctic regions a correlation coefficient in combination with a time delay was computed for each of the CMIP-5 models. Thirdly, the subsurface ocean warming signal was multiplied with a value from the observed interval of melting sensitivities of the ice shelves. This way each surface warming signal is translated into a basal ice-shelf melting signal in each of the Antarctic basins.

The random selection from 600 warming signals and 19 oceanic scaling functions is combined with a randomly uniform selection from the observed basal melt sensitivity interval to an ensemble of 20,000 time series for each emission scenario.

The statistics of these time series is provided in (Figure 3).

Each ensemble member of these ice sheet forcing time series is then convoluted with the linear response function of the ice sheet model of the respective Antarctic region to obtain an estimate of the sea level contribution of this Antarctic sector to the global warming signal. This procedure is carried out for each member of the ensemble to obtain statistics of the sea level contribution of Antarctica from basal ice shelf melting.

In summary, For for each emission scenario the procedure works as follows (each of the items is described in more detail below and in (Levermann et al., 2014)):

1. Randomly sSelect a global mean temperature realization of the respective RCP-scenario from the 600 MAGICC-6.0 realizations constrained by the observed temperature record. The time series start in ~~1900-1850~~ and end in 2100.
2. Randomly sSelect one of 19 CMIP-5 ~~ocean~~ models in order to obtain a scaling factor and a time delay for the relation between global mean surface air temperature and subsurface ocean warming in the respective regional sector in the Southern Ocean.
3. SRandomly select a melting sensitivity in order to scale the regional subsurface warming outside of the cavity of the Antarctic ice shelves onto basal ice shelf melting.
4. Select an ice sheet model that is forced via its linear response function with the time series of the forcing obtained from Steps 1-3.
5. Compute the sea-level contribution of this specific Antarctic Ice Sheet sector according to linear response theory.
6. Repeat Steps 1-5 20,000 times with different random selections in each of the steps in order to obtain a probability distribution of the sea-level contribution of each Antarctic sector and each carbon emission scenario.

Thus, the 20,000 selections are obtained by randomly choosing one temperature time series, one CMIP-5 ocean model, one melt sensitivity and one ice sheet model.

The procedure is also used for each of the ice sheet models separately. In this case the random selection in Step 4 is replaced by a fixed selection of the model. The procedure is illustrated in Figure 1.

For the computation of the total sea level contribution from all Antarctic sectors together, the forcing is selected consistently for all sectors. That means that for each of the 20,000 computation of the sea level contribution one global mean temperature realization is selected and one ocean model for the sub-surface temperature scaling and one basal melt sensitivity. Although there are other possibilities, this approach was chosen because it preserves the forcing structure as provided by the ocean models which is why we selected it. Some dDetails of ~~the~~ steps 1-5 are ~~now~~ given in the coming sub sections:

## 2.1 Surface temperature scenario ensemble

We here use the Representative Concentration Pathways (RCPs) (Meinshausen et al., 2011; Moss et al., 2010). The range of possible changes in global mean temperature that result from each RCP is obtained by constraining the response of the emulator model MAGICC 6.0 (Meinshausen et al., 2011) with the observed temperature record. This procedure has been used in several studies and aims to cover the possible global climate response to specific greenhouse-gas emission pathways including the carbon cycle feedbacks (e.g. (Meinshausen et al., 2009)). Here we use a set of 600 time series of global mean temperature from the year 1900 to 2100 for each RCP that cover the full range of future global temperature changes. Compare (Levermann et al., 2014) for details.

## 2.2. Subsurface oceanic temperature scaling

We use the simulations of the Coupled Model Intercomparison phase 5 (CMIP-5)(Taylor et al., 2012) to obtain a scaling relationship between the anomalies of the global mean temperature and the anomalies of the oceanic subsurface temperature for each model. This has been carried out for the CMIP-3 experiments (Winkelmann et al., 2012) and was repeated for the CMIP-5 climate models in (Levermann et al., 2014). The scaling approach is based on the assumption that anomalies of the ocean temperatures resulting from global warming scale with the respective anomalies in global mean temperature with some time delay between the signals. We use oceanic temperatures from the subsurface at the mean depth of the ice-shelf underside (Table 1) in each sector (Figure 2) to capture the conditions at the entrance of the ice-shelf cavities. As a small difference to the previous publication we modelled the Antarctic Peninsula separately with the ice sheet models. In order to be able to keep the same forcing we use, however, the same oceanic scaling as in the Amundsen Region which was the approach in the previous publication. The surface warming signal,  $\Delta T_g(t)$ , needs to be transported to depth, therefore the best linear regression is found with a time delay between the changes in global mean surface air temperature and subsurface oceanic temperatures, i.e.

$$-\Delta T_o(t) = \alpha_r \cdot \Delta T_g(t - \tau) \quad (1),$$

where  $\tau$  is a CMIP-5-model and region-specific time delay.

For the probabilistic projections the scaling coefficients are randomly drawn from the provided 19 CMIP-5 models. This approach may not be valid for absolute values and does not account for changes due to abrupt ocean circulation changes (Hellmer et al., 2012). However, the assumption is consistent with the linear-response assumption underlying this study and the correlation coefficients obtained for the 19 CMIP-5 models used here are overall relatively high for each of the oceanic regions (Tables 2-5). In any case it is crucial to keep this limitation in mind when interpreting the results.

## 2.3 Sensitivity of basal ice shelf melting

In order to translate the ocean temperature changes into additional basal ice-shelf melting for the five regions, we apply a basal melt sensitivity  $\beta$  in a linear scaling approach, i.e.

$$-\Delta b m = \beta \cdot \Delta T_o \quad (2).$$

While great advances have been made in the past years bringing together observations and measurements of Southern Ocean properties (e.g., (Schmidtko et al., 2014)) as well as sub-shelf melt rates and volume loss from Antarctic ice shelves (e.g., (Paolo et al., 2015; Rignot et al., 2013)), the relation between oceanic warming and changes in basal melting is still subject to high uncertainties (Paolo et al., 2015).

Furthermore, some of the observed changes in sub-shelf melting are likely caused by changes in the ocean circulation, rather than warming due to anthropogenic climate change (Hillenbrand et al., 2017; Jenkins et al., 2018). The recently observed ice loss in the Amundsen region for instance has been linked to the inflow of comparably warm circumpolar deep water into the ice-shelf cavities (e.g., (Hellmer et al., 2017; Pritchard et al., 2012)). Similarly, the observed thinning in the Totten region in East Antarctica is largely driven by changes in the surrounding ocean circulation (Greenbaum et al., 2015; Wouters et al., 2015).

In our simplified approach, we therefore draw the melt sensitivity parameter with equal probability from an empirically-based interval between 7 and 16  $\text{m a}^{-1} \text{K}^{-1}$  (based on (Jenkins, 1991; Payne et al., 2007)). While this approach neglects the complex patterns arising for observed basal melt rates in Antarctica, it is consistent with the response function methodology adopted here. Note that we are applying melt-rate anomalies to derive the response functions – the ice-sheet model simulations still display a wide range of total melt rates, with generally higher melting near the grounding line and lower melting or even refreezing towards the ice-shelf front. This is consistent with the vertical overturning circulation typically found in ice-shelf cavities (Lazeroms et al., 2018; Olbers and Hellmer, 2010; Reese et al., 2018b).

Formatted



Combining the global mean temperature time series of Section 2.1 with the CMIP-5 oceanic scaling of Section 2.2 with the basal melt sensitivity described here in a probabilistic way, i.e. by choosing an ensemble of 20,000 combination of each of these three components yields the basal melt time series in Figure 3. The horizontal black line depicts the 8 m/yr level. The basal melt time series are scattered around this level. For the projections we will thus use the switch-on experiments with 8 m/yr of additional basal melt as described below. This is the most balanced choice to span the range of simulations, with 4 m/yr being too low for most of the RCP-8.5 scenario and 16 m/yr being too high for the majority of scenarios and ensemble samples. This is the best available set of simulation with 4 m/yr being too low for most of the RCP-8.5 scenario and 16 m/yr being too high for most of the scenarios altogether.

The reason for carrying out experiments in which a constant additional basal-melt forcing is applied for a period of 200 years is that this allows to easily derive linear response functions for the different ice sheet models in the different regions as described in the next subsection.

#### 2.4 Deriving the ice-sheet response function

The core of the projections of the future sea level contribution from Antarctic basal ice shelf melting are simulations with 16 ice sheet models. The models were forced with a constant additional basal ice shelf melting of 8m/yr. The forcing was applied homogeneously in each of the five oceanic sectors separately (Figure 2). The regions were chosen to avoid ice dynamic interference between the regions on the time scale of this century. In order to check this Additional-additional simulation with all regions forced simultaneously, as was were carried out by some of the modelling groups (all data is provided as a supplement to this manuscript)-. These simulations showed that, any possible non-linear interactions between the flow of the different basins which do exist on longer time scales (Martin et al., 2019) are negligible on the time scale of 200 years used here and will not be considered any further in this study. For comparison additional simulations with 4m/yr and 16m/yr were carried out. This will bes discussed below. A number of modelling groups carried out further simulations with 1, 2 and 32m/yr of basal melt rates. Although these simulations are highly interesting, a full discussion of their results These simulations even though highly interesting are beyond the scope of this publication. The results of the 32m/yr simulations are provided in supplementary figures S1-S4. Here we aim at providing an estimate of the future sea level contribution from Antarctic ice discharge and the uncertainty that is associated with the uncertainty in the external forcing.

One of the strongest assumption of the projections computed here is that of a linear response of the ice sheet dynamics to external forcing. That however might sound worse than it is. Please note that a linear response does This however does not mean that it is not assumed that the ice discharge is increasing linearly with time. It merely assumes that increasing the magnitude of the forcing by a specific factor will increase the magnitude of the response of the ice sheet by the same factor.

The temporal evolution of the ice sheet is given by a temporarily varying response function. The response function,  $R(t)$ , is defined as the response of the system to a delta-peak forcing. It could be estimated by measuring the response of the ice sheet to a one year basal melt forcing of 1m/yr which would correspond to a unit forcing for a short period of time. Once the response function is known the assumption is that the response to any given forcing,  $m(t)$ , can be obtained by linear superposition which in a time-continuous situation translates into a convolution of the response function with the forcing:

$$S(t) = \int_0^t d\tau m(\tau) \cdot R(t - \tau) \quad (34)$$

where  $S(t)$  is the sea-level contribution from ice discharge and,  $t$ , is time starting from a period prior to the beginning of a significant forcing. From equation (34) it is clear that the response function can also be obtained from a Heavyside forcing where basal melt is switch on to a constant value,  $\mu$ , at a specific time and then kept constant as it was done here. In that case the observed response,  $A_\mu(t)$ , is simply the time integral of the response function

$$A_{\mu}(t) = \mu \cdot \int_0^t d\tau R(\tau) \quad (42)$$

and The response functions for each of the ice-sheet models using the fixed Heavyside-forcing  $\mu = 8m/yr$  and then taking the time derivative of the response  $A_{8m/yr}(t)$  and dividing it by  $\mu 8m/yr$ , the response function is obtained. Due to the relatively strong inertia of ice sheet models this approach generally yields more robust results compared to a delta-peak approach which is why we have followed this path here. Another option which is often used in solid state physics to obtain the response functions (for example their oscillatory excitations) is by forcing the system with a white noise. Fourier-transformation of equation (34) will then transform the convolution into a simple product and the white noise becomes a constant in Fourier space. The Fourier transform of the response divided by this constant is then simply the Fourier transform of the response function. This approach, however, is not helpful to obtain a short term response to a slow moving system such as an ice sheet.

## 2.5 Description of the ice sheet models

The ice sheet models used here all take part in the [InitMIP/initMIP](#) intercomparison project for Antarctica (Seroussi et al., 2019) within the overall ISMIP6 initiative (Goelzer et al., 2017; Nowicki et al., 2016). Since the description of their respective ability to reproduce the present ice dynamics of Antarctica is a study in its own we refer to the corresponding model description papers and provide only a brief description of each of the model in the appendix A.

## 2.6 Validity of the linearity assumption

In order to see how well the validity of the linearity assumption of linearity is, we plotted in Figures 4a-e the original simulations of each model for an 8 m/yr additional basal melt forcing (black curves) which is held constant over 200 years for the 200 years of the forcing period. In addition, we plot the outcome of the 4 m/yr experiment (blue solid curves) and the 16 m/yr experiments (red solid curves) together with the 8 m/yr experiments divided by two (blue dashed) and multiplied by two (red dashed). Generally the agreement is reasonable. Please note that it might be considered extraordinary. The fact that validity of the that a linearity assumption can be extended all the way to a doubling and halving of the forcing is extraordinary where it is true.

As a quasi-quantitative measure for the validity of the linearity assumption we computed an exponent  $\alpha$  such that the curves

$$A_{4,\alpha}(t) \equiv \left(\frac{4m/yr}{8m/yr}\right)^{1+\alpha} \cdot A_8(t) = 2^{-(1+\alpha)} \cdot A_8(t) \quad (53)$$

$$A_{16,\alpha}(t) \equiv \left(\frac{16m/yr}{8m/yr}\right)^{1+\alpha} \cdot A_8(t) = 2^{(1+\alpha)} \cdot A_8(t) \quad (64)$$

have the least square error to their respective target functions  $A_4(t)$  and  $A_{16}(t)$ . The values for  $\alpha$  are provided for each model in each sector in Figures 4a-e together with the respective curves as dotted lines. In the case of perfect linearity  $\alpha = 0$ . If  $\alpha < 0$  a doubling of  $A_8(t)$  yields a curve that is higher than  $A_{16}(t)$ , i.e. the model responds sub-linearly to basal melting. This also means that a halving of  $A_8(t)$  is an overestimation of  $A_4(t)$ . This was the case for most models. As can be seen from the comparison of the curves with the  $\alpha$ -correction and the original simulations values are, however, generally close to zero, linearity can be assumed for the relatively short response time of 200 years and the forcing range applied in this study which represents linearity.

The term ‘‘No scaling’’ was used when no  $-1 < \alpha < 2$  represented a valid minimum of the error, i.e. the different experiments are not linearly related. This is only the case for very small and noisy responses predominately in the Antarctic Peninsula. The

term “No data” means that the modelling group did not provide the corresponding data. For the computation of the sea level projections ~~we used~~ the 8m/yr experiments were used throughout this study.

The response function for each model and each region is given in Figures 5a-e together with their 10-year running mean. The response function is unitless because it is a sea level rise (m/yr) divided by basal melting rate (m/yr). Note this is the response the model would show for a short and sudden forcing of 1-year of 1 m/yr additional basal ice shelf melting in the region. While some models show an instantaneous ice loss response (e.g. in East Antarctica the models AISM-VUB, ISSM-UCI, PISM-VUW and UA-UNN), most models exhibit a more gradual increase of the ice loss over time. The temporal structure of the response is a result of the complexity of the ice dynamics and its interaction with the initial condition and the bed topography.

10 As can be seen from the basal melt projections in Figure 3 the applied melt rates vary strongly around 8 m/yr. In the supplement (Figures S1a-e) the results for the 32 m/yr switch-on experiments are provided for context for the models that have performed these experiments. The linearity assumption is not necessarily a good assumption in ~~some all~~ cases, but but in most cases the assumption is a reasonable approximation of how basal melting is responding to external forcing.

~~not that far off in most cases.~~

15 For the adaptive-grid-model BISICLES the scaling is shown for simulations with finest horizontal resolution of 1000m while the projections are carried out with a simulation with finest horizontal resolution of 500m (shown as the black dashed curve in the BISI-LBL panels of Figures 4a-e). Due to computational constraints the linearity check had to be done at the slightly lower resolution (1000m). As can be seen in the Figures 4a-e there are some quantitative deviations between the higher and lower resolution simulations but the results are not qualitatively different.

20

### 3 Hindcasting the observational record

The projections of sea-level contributions from Antarctica due to basal melting underneath the ice shelves following the linear response theory ~~are-were~~ started in the year 1900 in order to make sure that no significant global mean temperature increase influences the outcome. Following the procedure described above and thereby using the combined equations of Figure 1 the sea level contribution is computed from:

$$S_r(t) = \int_0^t d\tau \beta \cdot \alpha_r \cdot \Delta T_G(\tau - \tau_r) \cdot R(t - \tau) = \alpha_r \beta \cdot \int_0^t d\tau \Delta T_G(\tau - \tau_r) \cdot R(t - \tau) \quad (75)$$

with constants  $\alpha_r$ ,  $\beta$  and  $\tau_r$  derived from observations or CMIP-5 model results and the index,  $r$ , indicating the specific Antarctic forcing region (Figure 2). We can then hindcast the observed sea-level contribution between 1992 and 2017 and compare it to observations (Figure 6). To this end we use the results by (Shepherd et al., 2018) which do not differ significantly from earlier estimates (Shepherd et al., 2012). The time series of the median observed sea level contribution is given as a white line in Figures 6 and 7 with the uncertainty range given as the grey shading. The individual model results are given as the median and the likely range around this median (66-percentile around the median) as the full and dotted black lines. While individual models may deviate strongly from the observed range, the combination of all models shows a similar contribution for the time period 1992-2017 as was observed (Figure 6 and 7, Table 6).

An important issue regarding the comparison with observations (Figure 6) is whether the individual models or individual projections should be weighted according to their ability to hindcast the observed contribution to global sea level rise. One way to do this would be that the weight,  $w_i$ , of a specific computed time series (using a specific atmospheric temperature time series and a specific ocean model and a specific melting sensitivity) is computed as following:

$$w_i = \frac{1}{N} \cdot e^{(\Delta S_i - \Delta S_{obs})^2 / 2\sigma}$$

where  $\Delta S_{obs}$  is the observed median sea-level contribution of Antarctica between 1992 and 2017 according to (Shepherd et al., 2018) and  $\sigma$  is the uncertainty of this estimate according to the same publication. The normalization factor  $N$  would depend on the sample of computations that are compared. It would be chosen such that the sum over all realizations within a set is one. Thus the weight for a specific realization could be different if the contribution is computed for only one specific ice model or if it is computed for all ice models. We have decided against this kind of weighting for the simple reason described in the introduction, namely that the comparison of a model-forcing combination to reproduce the past does not reflect its ability to project the future. The reason for this is that the main contribution from Antarctica to the sea level rise since 1992 arose from a specific oceanic warming in the Amundsen Sea Sector which cannot be easily linked to the global mean temperature increase. It is definitely not reflected in the procedure that we apply here to obtain the forcing underneath the ice shelves (Figure 1). Applying such a weighting would thus distort the results in an unjustified way.

~~Please note that the contribution as obtained by the procedure described here is likely not to capture the actual processes that are responsible for the observed ice loss particularly in Amundsen Sea Sector.~~ The comparison is done here in order to illustrate the order of magnitude of the signal that is obtained by this procedure. Compared to earlier ice sheet models the newer generation is able to exhibit a dynamic behaviour that is at least of the same order of magnitude compared to observations. ~~Please note that h~~Here only positive temperature anomalies above the reference level are accounted for. That is because it cannot be claimed that linear response as described in equation (57) can also capture a negative response which would be due to processes like refreezing. This may lead to a small positive bias in the initial period at the beginning of the 20<sup>th</sup> century and thereby to a small overestimation of the observed sea level contribution. ~~Furthermore the observations will include changes in surface mass balance, in particular an increase in snowfall which is not captured by our approach.~~ Thus

Formatted: Normal, Line spacing: single

Formatted: Normal, Line spacing: single

even though the comparison with observations seems to be compelling, it is not as strong a test as it might seem. It really just serves as a check for the order of magnitude of the response.

#### 4 Projecting the 21<sup>st</sup> century sea-level contribution of Antarctica from basal ice shelf melting

Finally we compute the projections of Antarctica's contribution to future sea level rise using equation (43) following the schematic of Figure 1 as described in Section 2. The overall Antarctic projections including all uncertainty in basal melt forcing for each of the ice sheet models under the atmospheric CO<sub>2</sub> concentration path RCP-2.6 and 8.5 are given in Figure 8 and 9, respectively. The values for the median, the likely range (16.6- and 83.3 percentiles) and the very likely range (5- and 95 percentiles) are provided in Tables 7-10 for all four RCP scenarios.

The results for RCP-8.5 for each of the five Antarctic regions is provided in Figures 10a-e. The results differ between the different models. Overall, median contributions around 5cm come from Weddell Sea sector and East Antarctic while Ross and Amundsen Sea sector have a median contribution around 2cm and the Peninsula has a very low median contribution. The largest median contributions arise from Weddell Sea sector, while the largest 95-percentile is found in the East Antarctic sector, followed by the Weddell Sea Sector and the Ross and Amundsen Sea Sectors (Figure 11). This is because the forcing onto the ice sheet is transported not with a particular oceanic current but is mainly mixed to the ice shelves due to the overall coarse resolution of the CMIP-5 climate models. It thus arrives everywhere and the East Antarctic ice sheet has the most ice catchment area that is in direct contact with the ocean due to its mere size. While in East Antarctica 2-4 models have a stronger contribution than the others (PISM-VUW, UA-UNN, IMAU-UU and ISSM-UCI), this is more evenly distributed For the three West Antarctic outlet regions the model results are more similar than for East Antarctica. However, overall the models show quite similar responses to the forcing and overall the uncertainty in the sea level response is dominated in the uncertainty in the forcing.

There are a number of different regions for relatively weak responses of some models in some regions. These reasons are as diverse as the models are.

For the spin-up of the GRISLI model, an inversion procedure (Le clec'h et al., 2019) was used to infer a map of the basal drag coefficient that minimises the ice thickness mismatch with respect to the observations and the drift over a 200 yr equilibrium simulations. The procedure is iterative and computationally cheap but some errors may remain in some places. This resulted in a relatively large positive ice thickness drift in the Amundsen region. The GRISLI model is thus almost insensitive to basal melting rate anomaly in this region as the error in the grounded ice is too large. Conversely, there are relatively low errors in the Ross region and the response to the oceanic perturbation is stronger there. In addition, in some regions there are compensating errors (positive bias in some places and negative bias in others) which complicate the analysis of the response curve in term of sea level.

In addition, as for the initMIP-Antarctica experiments, a homogeneous sub-shelf basal melting rate was used for each individual IMBIE basin. The value for each basin was computed as the basin-averaged of the sub-shelf basal melting rates that ensure a minimal ice shelf thickness Eulerian derivative in a forward experiment with constant climate forcing and fixed grounding line position. The spatial average is needed in order to smooth the otherwise noisy melt rates and it also provides melt rates for a changing ice shelf geometry. Nonetheless, in doing the spatial average the model tends to overestimate the melt away from the grounding line and underestimate it in its vicinity, where it has the largest impact on ice dynamics.

It is beyond the scope of this article to provide a detailed analysis of the causes for the model response differences. Here we discuss possible reasons for the deviations of the different models from the median in order to give some information that is special for the different models and to provide some guidance to read the results.

The response of PISM-AWI model is slightly lower than the median response across all models. This can be partially understood by breaking down the response to the individual sectors and their discrepancy between modelled spin-up and observed state. In the Weddell Sea sector the initial grounding line position is already retreated inland, lowering this sector's potential sea level contribution in the forward runs. This could explain the relatively low sensitivity to the melt perturbation compared to other models. While the initial grounding line in the Amundsen Sea sector is captured well compared to observations, the corresponding ice shelf area is overestimated leading to a stronger buttressing and therefore a limited drainage via Pine Island and Thwaites glacier. Basal melt anomalies of above 8 m/yr are required to eliminate the additional ice shelf area in this region and thus has less influence on the sea level contribution. Already a small basal melt anomaly of 1 m/yr is sufficient to melt away large portions of Ronne and Ross ice shelf with only minor impact on the grounding line position on the time scales considered here.

The sea-level contribution from VUB-AISM is also somewhat below the median of the 16 state-of-the-art ice sheet models. It has a median of 0.06 m for RCP-2.6 (all model median mean is 0.13 m) and a median of 0.13 m for RCP-8.5 (all model median mean is 0.17 m). Experiments with the high 16 m/yr basal melt anomaly were not performed because most of the ice shelves are lost after 200 years, and the model does not include a proper treatment for calving at a moving margin, nor for the specific force balance of a calving front at the grounding line. Possible reasons for differences with the other models are most likely due to the various approximations made to simulate grounding line mechanics, and it seems fair to state that no model does this perfectly. Additionally, VUB-AISM is run at a resolution of 20 km over the entire model domain, which is rather coarse. Sub-grid scale mechanisms are not described, and this may affect the model sensitivity. Another difference is that VUB-AISM has a freely evolving grounding line in the spin-up, at the expense of a slight mismatch of the ice sheet geometry compared to the observations. In contrast to many of the other models, VUB-AISM represents the hindcast of the historical contribution to sea-level rise very well using the linear response functions.

Also CISM is one of the less sensitive models, with a median sea level contributions ranging from 0.07 m for RCP2.6 (Table 7) to 0.10 m for RCP8.5 (Table 10), compared to all-model means of 0.13 m and 0.17 m, respectively. The largest responses are in the East Antarctic, Weddell, and Ross sectors, with little change in the Amundsen sector and Antarctic Peninsula. One reason for the low sensitivity may be the multi-millennial spin-up procedure, during which the ice was nudged toward present-day thickness by adjusting basal sliding coefficients (beneath grounded ice) and basal melt rates (beneath floating ice). There was no attempt to match recent mass loss, and the spun-up ice sheet has considerable inertia. In multi-century CISM simulations substantial thinning and retreat in the Thwaites basin is seen, driven largely by MISI. The retreat however only begins after several decades of increased basal melting. Apart from MISI, CISM, as all models in this intercomparison, has no special mechanisms (e.g., hydrofracture) to promote fast grounding-line retreat.

The ISSM-JPL model shows a relatively weak sensitivity to basal ice shelf melt. By comparison the ISSM-UCI version of the model which shows a medium to strong response. The main difference between the 2 ISSM models is the different mesh resolution over the ice shelves and especially close to the grounding lines. The JPL model has a finer resolution over all the ice shelves (less than 5 km for all the floating ice at the beginning of the simulation) while the UCI models has a slightly coarser resolution in some parts of the ice shelves as the resolution is mostly refined in regions with large gradients of velocities. Otherwise, most parameters and parametrizations are similar, including the friction law and the exclusion of melt on partially grounded cells.

In order to understand the response of f.ETISH in a more global context, and especially the relatively weak response in Amundsen Sea sector compared to other regions, such as the Weddell sector, we can add that this is most likely related to underestimating the present-day peak melt rates near the grounding line in this sector. This is both due to the applied spatial resolution and the use of the PICO model. In order to understand the response of f.ETISH in a more global context, and especially the relatively weak response in Amundsen Sea sector, we can add that this is most likely related to underestimating the present-day peak melt rates near the grounding line in this sector. This is both due to the applied spatial resolution and the use of the PICO model (Reese et al., 2018b) (and associated temperature and salinity data in front of the ice shelf). For the Amundsen region, the PICO model leads to peak melt rates below 20 m/a, and adding even 32 m/a to this still remains to the low side compared to observed. Improvements on this sector are currently on its way in order to improve the match with present-day and glacier mass losses. The same accounts for the Weddell sector, where sub-shelf melting may be overestimated.

In general, the BISICLES model falls within the median group of models, but is generally on the more-responsive side in that grouping. This has much to do with the initialization of the model – the BISICLES runs use the initial condition from the initMIP exercise; since BISICLES falls in the median group of models in that exercise, it is unsurprising that it also falls in the median group in this context as well. It is well-known that models with insufficient resolution will generally tend to underestimate marine ice sheet response, which is borne out in the results here, in which the coarser-resolution (1km-resolution) BISICLES is less responsive than the finer (500m) resolution runs, although the differences are small in this case, because both cases are sufficiently-resolved to capture the dynamics in play. The BISICLES response function appears to be on the higher side in regions with no appreciable present-day grounding line retreat (like East Antarctica), possibly because it is better-able to capture the onset of new retreat and deploy sufficient resolution there. BISICLES appears more in-line with other models for the Amundsen Sea sector, possibly because substantial retreat and loss is already underway in that sector, so the actual dynamics remain relatively unchanged with increased subshelf melting.

(and associated temperature and salinity data in front of the ice shelf). Also the MALI-DOE model response is overall less sensitive than the model mean. For some Antarctic sectors (e.g., Ross and Amundsen Sea Sectors), average sea level trends or the shape of sea level curves from MALI-DOE compare well with those from other higher-order<sup>1</sup> models (e.g., BISICLES and UCI-ISSM). For other sectors (Weddell and EAIS), MALI-DOE response functions compare well with only one other model (BISICLES and SICO, respectively). In general, there is no obvious correlation between the only two three-dimensional, formally higher-order models in the study (MALI-DOE and UCI-ISSM), which suggests that something other than model dynamics is responsible for the differences in model response functions seen here (e.g., choice of model physics or model initialization procedure). For the hindcasting experiments, approximately half of the models compare reasonably well with observed trends in Antarctic mass loss while the other half are biased towards the high side of mass loss (both in terms of mean trends and upper bounds). MALI-DOE is within the former group (Fig. 6), initially overestimating then underestimating mass loss trends in the middle part of the observational record, but in good agreement in terms of both the mean trend and range in the latter part of the record. For experiments under the RCP scenarios, 7-10 models are (visually) in agreement regarding the mean and bounds on future sea-level rise from Antarctica, for most of the Antarctic sectors investigated. MALI-DOE is generally within this group. An exception to this can be found for the ASE under RCP 8.5, where MALI-DOE is slightly on the high side (for both the mean trends and upper bounds) relative to other models. This is likely an expression of MALI-DOE already exhibiting a trend towards significant mass loss from the ASE in its unperturbed, initial condition (see, e.g. Fig. 4a in (Seroussi et al., 2019)). While this trend is largely removed by differencing with the

<sup>1</sup> Here, by higher-order, we mean those that are formally a higher-order approximation of the Stokes equations, e.g. first-order (“Blatter-Pattyn”) or L1L2, as opposed to “hybrid” models which are a more *ad hoc* approximation to formally higher-order models.

control run, the unstable and nonlinear nature of the retreat in ASE likely increases the magnitude of mass loss forced under RCP scenarios.

The strongly sub-linear response of PISM-PIK to the additional basal melt forcing in the Ross region (Figure 4be) is likely to result partially from the applied spin-up procedure. In order to best match present-day observations in the most sensitive part of the West Antarctic Ice Sheet (mainly the Amundsen Sea sector) and due to computational costs PISM-PIK was initialized with a transient spin-up at the end of a 600-year run forced by present-day climatic boundary conditions that is not in equilibrium. This allows to reproduce recent change rates in the Amundsen sector, but trends in other regions (e.g. Siple Coast) can exceed present rates and superpose the ice sheet's response to the forcing in the experiments.

Another reason for PISM-PIK's sub-linear behaviour in this region is likely related to ice shelf break-up in the forcing experiments as a result of the interplay of strong melting near the grounding line and applied calving mechanism ("eigen-calving"; (Levermann et al., 2012)). For all additional sub-shelf melt rates, disintegration of Ross Ice Shelf is initiated near the grounding line, which is rather unrealistic. As the ice shelf remainders exert almost no buttressing onto the grounded ice stream flow there is almost no response of the sea-level relevant ice volume to the magnitude of melt forcing applied. Also the Peninsula region, where already in the initial state almost no ice shelves are present, shows no significant response. In contrast to Ross region and Peninsula, PISM-PIK shows slightly super-linear scaling in the Weddell region. Although large portions of the Filchner-Ronne Ice Shelf melt and calve off, a small part pinned to Korff and Henry ice rises remains in the forcing experiments and exerts buttressing. For higher melt rates, those ice shelf remainders exert decreasing buttressing on grounded ice sheet flow, which is associated with enhanced sea-level contributions.

A number of models scatter quite closely around the median model sensitivity when measured in the total ice sheet response.

One possibility distinguishing the PS3D-PSU model is the boundary-layer parameterization of ice flux across grounding lines (Schoof, 2007), imposed as a condition on ice velocity across the grounding line. This enables grounding-line migration to be simulated reasonably well without much higher grid resolution. Also the sub-grid grounding-line treatment ensures no substantial oceanic melt upstream of the grounding line, in contrast to some models. Note that the recently proposed mechanisms of hydrofracturing by surface meltwater and structural failure of large ice cliffs (Deconto and Pollard, 2016) are not enabled for the LARMIP experiments. Without these, previous studies with this model have found little retreat in East Antarctic basins with moderate sub-ice ocean melting alone, consistent with the generally smaller response for East Antarctica in the experiments here.

Similarly to the less sensitive models, the models which have an overall stronger response to basal ice shelf melting have similarly diverse reasons for their dynamics.

The sea level contribution of IMAU-UU is in the upper half of the ensemble and most similar to model ISSM-UCI and to some extent PISM-DMI and PISM-VUW (Figure 6.8,9 10a-d, Table 6-10). The only exception is the Antarctic Peninsula region (Figure 10e), where IMAUICE has the lowest response in the ensemble. This may be attributed to the relatively low horizontal grid resolution of the model (32x32 km), which prevents to resolve small-scale features important for this region.

Compared to other models in the ensemble, PISM-VUW yields a hindcast sea-level contribution that is above observed values, and a large spread in the projected contribution by 2100 under RCP 8.5 (less than 0.2 m up to c. 1m). Model differences appear to be spatially variable. For example, PISM-VUW projects SL contributions from the Ross Sea sector that are very consistent with most other models in the ensemble, and contributions from the Antarctic Peninsula and from the Amundsen Sea Embayment that lie consistently between the highest and lowest models. It is primarily the contributions



from the Weddell Sea sector that are very much higher than most other models, and since the combined East Antarctic contributions from PISM-VUW appear to be similarly skewed, it is reasonable to infer that the large Weddell Sea contributions are principally sourced from the Recovery Basin, in the eastern part of the sector. It seems reasonable that the different modelled response here arises from the way in which basal conditions are parameterised, for example, the basal substrate yield strength that determines the propensity of ice in this area to stream.

The set-up used for the LARMIP simulations with SICOPOLIS is the same as that used for the ISMIP6 projections ([tinyurl.com/ismip6-wiki-ais](http://tinyurl.com/ismip6-wiki-ais), publication in preparation, see also Appendix A.15). In most regions, the results show a rather high sensitivity to the applied ice-shelf basal melting anomalies. This is probably because any grid cell for which the centre point is floating is assigned the full ice-shelf basal melting rate, even if the grid cell is near the grounding line and parts of it might be detectable as grounded via a sub-grid interpolation technique. Relative to the other models, the sensitivity is largest for the Ross region. This correlates with the fact that for this region, in particular, the West Antarctic part including the Siple Coast ice streams, the regional basal sliding inversion (Appendix A.15) produces the largest values for the basal sliding coefficient.

Out of all the models the ÚA UNN model has overall the highest projection for future sea level contribution for Antarctica as a whole. This can mostly be attributed to the high amount of future sea level rise the model projects for East Antarctica as this region is the single largest contributor to future sea level rise. The model also projects a relatively strong contribution from the Amundsen and Antarctic Peninsula sectors, with more average projections when compared to the rest of the model ensemble from the Ross and Weddell sector. One possible explanation for this is that the ÚA UNN model over estimates the past Antarctic sea level rise when compared to observations (Figure 6). This would likely predispose the model to have a relatively large projection for the future contribution of Antarctic sea level rise when compared to other models that more accurately match the hindcast.

Across all models one can say that ~~E~~ven though the temperature difference between the scenarios is significant, the difference in the Antarctic ice sheet response is existent, but percentage-wise smaller. Table 11 gives a summary across the scenarios for all ice sheet models combined. The corresponding time series are given in Figure 12. The relative warming difference between RCP-8.5 and RCP-2.6 within this century (according to the median values) is about  $(32.72\text{K}-1.0\text{K})/1.0\text{K}=2740\%$  (Stocker et al., 2013). For comparison the Antarctic sea level contribution is (according to Table 11) about  $(0.187\text{m}-0.143\text{m})/0.143\text{m} = 2934\%$ . One reason for this is the time delay between the surface forcing and the subsurface oceanic forcing that is experienced by the ice shelves. The relative difference in global mean temperature increase between the scenarios also increases with time during this century. However, the strongly reduced relative sea level difference between the scenarios mainly reflects the inertia in the ice sheet dynamics which responds to the forcing in a time delayed way as can be seen from the response functions in Figure 5a-e. For the upper end of the very likely range (95-percentile) this ratio is larger,  $(0.6159\text{m}-0.4039\text{m})/0.4039\text{m} = 534\%$ , but still lower than the scenario ratio of the warming. This does not hold for the rate of change in sea level (Figure 13, Table 12) which is  $(4.44\text{mm/yr}-2.24\text{mm/yr})/2.24\text{mm/yr} = 10095\%$ .

Due to increasing interest of society and by extension of the Intergovernmental Panel on Climate Change, we also provide the sea level contributions of Antarctica due to basal ice shelf melting until the mid of the 21<sup>st</sup> century (Table 13) and the associated rate of sea level contribution (Table 14) and the contribution of Antarctica within the next 30 years (Table 15). There is practically no scenario dependence in this numbers. This is to be expected since the global warming signal only differs significantly between scenarios for time periods beyond 2040. It is found that in the next 30 years the median

Formatted: Normal, Space Before: 12 pt, After: 12 pt, Line spacing: single

Formatted: Normal, Line spacing: single

Formatted: Superscript

contribution of Antarctica to global sea level rise from basal ice shelf melting is 3cm with a likely range between 1 and 6cm. The applicability of these numbers is strongly limited by the caveats of the method as described in the next section.

Formatted: Font color: Auto

## 5 Discussion and conclusions

The projections of the Antarctic contribution to future sea level rise has to be seen in comparison with other studies. The fifth assessment report of the Intergovernmental Panel on Climate Change (IPCC-AR5) only had limited process-based model simulations available (Gladstone et al., 2012) and thus estimated a likely range for the ice dynamical contribution of the Antarctic Ice Sheet of 1cm to 16cm (Church et al., 2013). This estimate was largely based on statistical considerations by (Little et al., 2013a, 2013b) which do not represent a response to future warming, but merely estimate the possible statistical range of responses based on variations in observed discharge velocities. Thus these estimates are scenario-independent as was the projection by the IPCC-AR5. The IPCC-AR5 however added a footnote saying that the likely range could increase by “several decimetres” if the West Antarctic Ice Sheet becomes unstable. The following special reports of the IPCC that addressed sea level rise (Masson-Delmotte et al., 2018; Pörtner et al., 2019) included the estimates obtained with the same procedure applied here but for earlier ice sheet models (Levermann et al., 2014).

In the meantime a number of other studies have shed light on the importance of process-based projections of Antarctica, e.g. (Arthern et al., 2014; Favier et al., 2014; Gong et al., 2014; Joughin et al., 2014). For example it was shown that feedbacks between the Antarctic ice sheet and the surrounding ocean and atmosphere can strongly increase the ice loss from Antarctica (Golledge et al., 2019). In a model (Pollard and DeConto, 2009) that was able to reproduce paleo-evidence of the grounding line retreat in a location in Antarctica (Naish et al., 2009), it was shown that the inclusion of additional physical surface processes (Pollard et al., 2015) yields more than a doubling of the previous high-estimate of the ice loss considered possible from Antarctica (DeConto and Pollard, 2016). Although it was shown that the paleo constraints used in these simulations were insufficient to properly constrain future projections (Edwards et al., 2019), it cannot be ruled out that these processes are significant. Consequently there is large uncertainty in the ice sheet community regarding the possible contribution of Antarctica to future sea level rise as can be seen from two separate expert elicitations before (Bamber and Aspinall, 2013) and after the IPCC-AR5 (Bamber et al., 2019). These expert elicitations include all known and unknown uncertainties of possible responses of the Antarctic ice sheet to future warming and thus the likely and in particular the very likely ranges found in the elicitations are wider than those found with the procedure described here. By comparison the likely and very likely ranges found in the earlier estimate that was based on the linear response theory is the largest range if no additional processes such as hydrofracturing and cliff calving are included.

The latest assessment of the Intergovernmental Panel on Climate Change based on the literature published after IPCC-AR5 was carried out in the special report on the ocean and cryosphere (Oppenheimer et al., 2019). The author team estimated the Antarctic contribution within the 21<sup>st</sup> century under the RCP8.5 scenario to be 10cm with a likely range of 2cm to 23cm. In this study the likely range for the RCP-8.5 of 9cm to 38cm is slightly higher compared to the earlier studies likely range of 4cm to 21cm (Table 6 in (Levermann et al., 2014) “Shelf models with time delay”). The same is true for the very likely range where the current study finds 6cm to 61cm while the study with only three ice sheet models found 1cm to 37cm. The 2014 study even found a lower estimate for the very likely range if the time delay was omitted and the atmospheric warming was translated immediately into a scaled subsurface ocean warming (very likely range between 0.04 and 0.43cm). Also the median estimates in both studies are very different with 9 cm in the 2014 and 18cm in the present study for RCP-8.5.

The projections of the Antarctic ice sheet’s mass loss presented here have strong ~~constraints~~ limitations. First of all they are only the contribution from basal ice shelf melt. Any calving that might be incorporated in the modelling does not reflect atmospheric or even specific oceanic processes that may enhance calving in a warming world. Hydrofracturing and cliff calving is not explicitly accounted for. ~~There is no mass gain due to additional snow fall nor any responses to such a mass~~

Formatted: Superscript

~~addition. The approach is neglecting a number of processes such as surface-mass-balance related contributions and mechanisms. There is no mass gain due to additional snow fall nor any responses to such a mass addition. In assuming linear response theory, we are able to capture complex temporal responses of the ice sheets, but we neglect any self-dampening or self-amplifying processes. This is particularly relevant in situations where an instability is dominating the ice loss.~~

5 ~~Furthermore the linear response ansatz does not capture any self amplification due to an instability.~~ This is particularly important for the Marine Ice Sheet Instability (Pattyn et al., 2012; Pattyn and Durand, 2013; Weertman, 1974) that might have been triggered already in Amundsen Sea Sector (Favier et al., 2014; Joughin et al., 2014; Rignot et al., 2014) and might lead to the eventual discharge of the entire marine ice sheet in West Antarctica over a multi-centennial to multi-millennial time scale (Feldmann and Levermann, 2015). Results obtained here are thus relevant in particular wherever the ice loss is dominated by the forcing as opposed to an internal instability, for example in strong warming scenarios. The study also does not include any feedbacks between the ice sheet and its surroundings. Although feedbacks between the surface mass balance and the ice dynamics are expected to be small (Cornford et al., 2015) there might be significant feedbacks with the ocean circulation both locally and globally (Golledge et al., 2019; Swingedouw et al., 2008). Basal melt rate anomalies are added to the background run of the different ice sheet models. However, as melting parameterizations in ice sheet models vary, the amount of sub-shelf melt rates respond differently to the evolving geometry. This is a feedback that is captured in the approach, but might be quite different across the models.

10 These strong caveats that are associated with the approach presented here ~~tend to lead to an underestimation may either lead to an over- or an underestimation~~ of the ice loss from basal ice shelf melting compared to what might occur in reality. ~~As a consequence~~ In any case the median contribution from basal ice shelf melting of Antarctica under any scenario is found to be higher within the 21<sup>st</sup> century than it was in the last century. The values obtained here for the basal ice shelf contribution from Antarctica are slightly larger than other probabilistic estimates of the ice loss with (Bakker et al., 2017; Ruckert et al., 2017) and without climate change (Little et al., 2013b). They are much lower than the values that may be obtained if additional processes such as the marine cliff instability and hydrofracturing are included (Deconto and Pollard, 2016). Whether these high estimates, however, can be well constrained by paleo evidence is still under intense debate (Edwards et al., 2019).

25 However due to the very large potential sea level contribution of Antarctica and its high sea level commitment compared to the other contributions (Levermann et al., 2013) the rate of change increases strongly over the century. Under the RCP-8.5 scenario the median rate of sea level contribution by the end of the 21<sup>st</sup> century from basal-melt-induced ice loss from Antarctica alone is with 4.1 mm/year larger than the total-mean rate of currently-observed sea level rise observed in the beginning of this century (Dangendorf et al., 2019; Hay et al., 2015; Oppenheimer et al., 2019) (~~Dangendorf et al., 2019; Hay et al., 2015~~).

30 ~~An important issue regarding the comparison with observations (Figure 6) is whether the individual models or individual projections should be weighted according to their ability to hindcast the observed contribution to global sea level rise. One way to do this would be that the weight,  $w_i$ , of a specific computed time series (using a specific atmospheric temperature time series and a specific ocean model and a specific melting sensitivity) is computed as following:~~

$$w_i = \frac{1}{N} \cdot e^{(\Delta S_i - \Delta S_{obs})^2 / 2\sigma}$$

40 ~~where  $\Delta S_{obs}$  is the observed median sea level contribution of Antarctica between 1992 and 2017 according to (Shepherd et al., 2018) and  $\sigma$  is the uncertainty of this estimate according to the same publication. The normalization factor  $N$  would depend on the sample of computations that are compared. It would be chosen such that the sum over all realizations within a set is one. Thus the weight for a specific realization could be different if the contribution is computed for only one specific ice model or if it is computed for all ice models. We have decided against this kind of weighting for the simple reason~~

described in the introduction, namely that the comparison of a model forcing combination to reproduce the past does not reflect its ability to project the future. The reason for this is that the main contribution from Antarctica to the sea level rise since 1992 arose from a specific oceanic warming in the Amundsen Sea Sector which cannot be easily linked to the global mean temperature increase. It is definitely not reflected in the procedure that we apply here to obtain the forcing underneath the ice shelves (Figure 1). Applying such a weighting would thus distort the results in an unjustified way.

Although the method described here has a large number of caveats it provides an estimate of the role of the uncertainty in the oceanic forcing for the uncertainty in Antarctica's future contribution to sea level rise. By comparison with the earlier study using the same method but only three ice sheet models of an earlier model generation, we find first of all a shift of the sea level contribution to higher values and secondly an increase in the ranges of uncertainty. We thus have to conclude that uncertainty with respect the ice dynamic contribution of Antarctica due to future warming is still increasing and thus that coastal planning has to take into account that multi-decadal sea level projections are likely to change with increasing understanding of the ice dynamics and their representation in ice sheet models. This study provide an estimate of the uncertainty in the future contribution of Antarctica to global sea level rise only based on known ice dynamics but including the full range of forcing uncertainty. It substantiates the result of the previous study that Antarctica can become the largest contributor to global sea level rise in the future, in particular if carbon emissions are not abated.

|

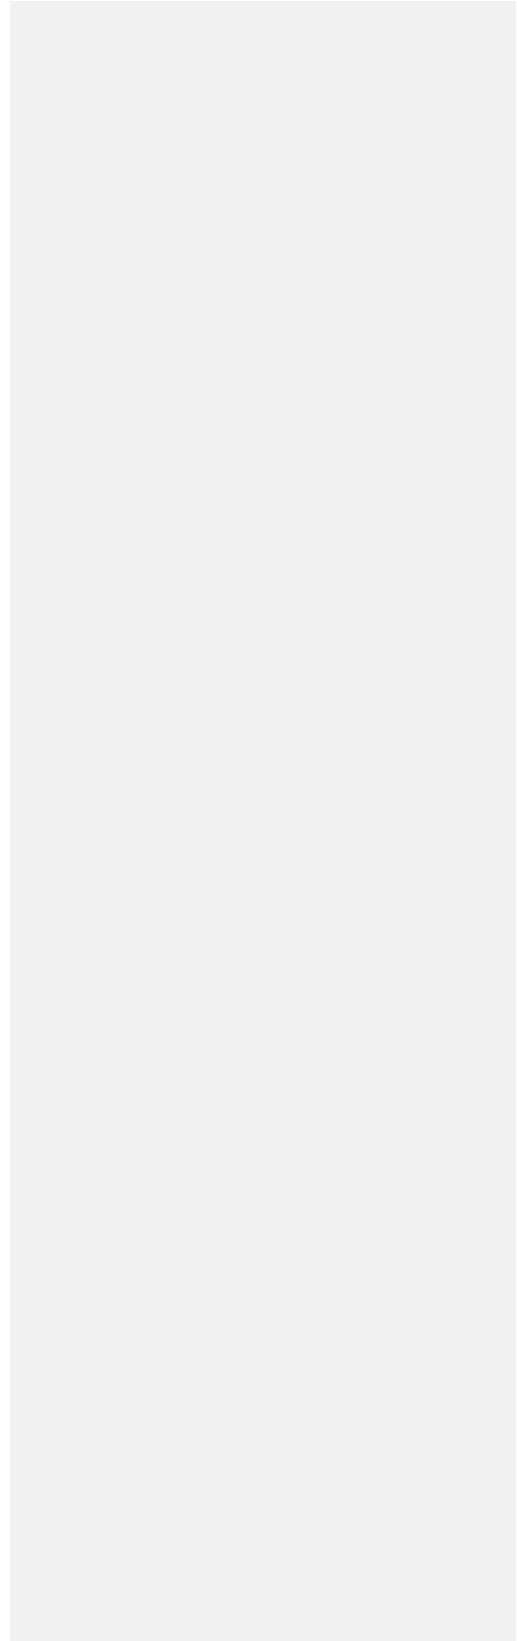

## Acknowledgments

Support for D. Martin, TZ, MJH, MP, SFP, and EN was provided through the Scientific Discovery through Advanced Computing (SciDAC) program funded by the US Department of Energy (DOE), Office of Science, Biological and Environmental Research, and Advanced Scientific Computing Research programs. Their contributions relied on computing resources from the National Energy Research Scientific Computing Center, a DOE Office of Science user facility supported by the Office of Science of the US Department of Energy under contract no. DE-AC02-05CH11231.

CR has received funding from the European Research Council under the European Community's Seventh Framework Programme (FP7/2007–2013)/ERC grant agreement 610055 as part of the Ice2Ice project.

HG has received funding from the program of the Netherlands Earth System Science Centre (NESSC), financially supported by the Dutch Ministry of Education, Culture and Science (OCW) under Grantnr. 024.002.001.

Work was performed at the Jet Propulsion Laboratory, California Institute of Technology. HS and NJS were supported by grants from the NASA Cryospheric Science, Sea Level Change Team, and Modeling Analysis and Prediction Programs.

RG was supported by the Japan Society for the Promotion of Science (JSPS) KAKENHI grant numbers JP16H02224, JP17H06104 and JP17H06323.

The work of T.K. and A.H. has been conducted in the framework of the PalMod project (FKZ: 01LP1511B), supported by the German Federal Ministry of Education and Research (BMBF) as Research for Sustainability initiative (FONA).

The material provided for the CISM model is based upon work supported by the National Center for Atmospheric Research, which is a major facility sponsored by the National Science Foundation under Cooperative Agreement No. 1852977. Computing and data storage resources, including the Cheyenne supercomputer (doi:10.5065/D6RX99HX), were provided by the Computational and Information Systems Laboratory (CISL) at NCAR.

TA was supported by the Deutsche Forschungsgemeinschaft (DFG) in the framework of the priority program "Antarctic Research with comparative investigations in Arctic ice areas" by grant LE1448/6-1 and LE1448/7-1. JG acknowledges funding from the Leibniz Association (project DominoES).

Development of PISM is supported by NASA grant NNX17AG65G and NSF grants PLR-1603799 and PLR-1644277.

The authors acknowledge the European Regional Development Fund (ERDF), the German Federal Ministry of Education and Research, and the Land Brandenburg for supporting this project by providing resources on the high-performance computer system at the Potsdam Institute for Climate Impact Research.

Computer resources for this project have also been provided by the Gauss Centre for Supercomputing/Leibniz Supercomputing Centre (<https://www.lrz.de>) under Project-ID pr94ga.

JvB and PH acknowledge support from the iceMOD project funded by the Research Foundation – Flanders (FWO-Vlaanderen).  
MM received funding from the National Science Foundation (NSF Grant #1739031) through the PROPHET project, a component of the International Thaites Glacier Collaboration (ITGC).

Formatted: Font: 10 pt, Not Bold

## Appendix A: Brief description of ice sheet models

The model initialization was carried out according to the [initMIP](#) protocol and is described together with the models and their set-up in (Seroussi et al., 2019)

### 5 A.1 AISM-VUB: Antarctic Ice Sheet Model - VUB (Vrije Universiteit Brussel)

The Antarctic ice sheet model AISM VUB derives from a coarse-resolution version used mainly in simulations of the glacial cycles (Huybrechts, 1990, 2002). The version used here is identical to the VUB AISMPALEO model participating in [initMIP-Antarctica](#) (Seroussi et al., 2019). It considers thermo-mechanically coupled flow in both the ice sheet and the ice shelf, using the respective shallow ice approximation and shallow ice shelf approximation coupled across a one grid cell wide transition zone. Basal sliding is calculated using a Weertman-relation inversely proportional to the height above buoyancy wherever the ice is at the pressure melting point. The horizontal resolution is 20 km and there are 31 layers in the vertical. The model is initialized with a freely evolving geometry until steady-state is reached, using observed climatologies for the surface mass balance. The sub-shelf basal melt rate is parameterized as a function of local mid-depth (485–700 m) ocean-water temperature above the freezing point (Beckmann and Goosse, 2003). A distinction is made between protected ice shelves (Ross and Filchner-Ronne) with a low melt factor and all other ice shelves with a higher melt factor. Ocean temperatures are derived from the LOVECLIM climate model (Goelzer et al., 2016) and parameters are chosen to reproduce observed average melt rates (Depoorter et al., 2013). Heat conduction is calculated in a slab bedrock of 4 km thick underneath the ice sheet. Isostatic compensation is based on an elastic lithosphere floating on a viscous asthenosphere (ELRA model), but this feature is not allowed to evolve further in the current experiments. The LARMIP basal melting rates are applied on top of the present-day melt rates used for the initialization.

### A.2 BISI-LBL: BISICLES

The finite-volume BISICLES Model (Cornford et al., 2013) is used with a modified LIL2 scheme (Schoof and Hindmarsh, 2010) over the entire Antarctic ice sheet. The model employs adaptive mesh refinement (AMR) to vary resolution between a finest resolution (either 1000m or 500m, depending on the run) near grounding lines and shear margins and 8 km in the interior of the domain. Basal sliding follows a Coulomb-limited friction law (Tsai et al., 2015), resulting in power-law sliding (with a spatially varying friction coefficient) across the majority of the ice sheet with and Coulomb sliding in regions close to flotation. Ice viscosity is computed following (Cuffey and Paterson, 2010), assuming a prescribed temperature and an enhancement factor. The basal friction coefficient and the enhancement factor are chosen to best match observed surface velocity (Rignot et al., 2011) using a gradient-based, Tikhonov regularized optimization scheme (Cornford et al., 2015). The grounding line position is determined using hydrostatic equilibrium, with sub-cell treatment of the friction and a modified driving stress (Cornford et al., 2016). The melt rate is applied only for fully-floating cells (as in (Seroussi and Morlighem, 2019)) and is composed of a base rate and the anomalies specified in the individual experiments. The base melt rate is time varying and designed to prevent ice shelf thickening but permit thinning where flux divergence in the shelf is positive. The surface mass balance is from (Arthern et al., 2006). The ice front position is fixed at the extent of the present-day ice sheet. After initialization, the model is relaxed for 2 years, with the base melt rate only applied. For more details on the model and the initialization procedure, we refer to (Cornford et al., 2015).

### A.3 CISM-NCA: Community Ice Sheet Model - NCAR

For LARMIP, the Community Ice Sheet Model (Lipscomb et al., 2019) uses finite element methods to solve a depth-integrated higher-order approximation (Goldberg, 2011) over the entire Antarctic ice sheet. The model uses a structured rectangular grid with uniform horizontal resolution of 4 km and 5 vertical  $\sigma$ -coordinate levels. The ice sheet is initialized

with present-day geometry and an idealized temperature profile, then spun up for 30,000 years using 1979-2016 climatological surface mass balance and surface air temperature from RACMO2 (Lenaerts et al., 2012; van Wessem et al., 2018). During the spin-up, basal friction parameters (for grounded ice) and sub-shelf melt rates (for floating ice) are adjusted to nudge the ice thickness during present-day observations. This method is a hybrid approach between assimilation and spin-up, similar to that described by (Pollard and Deconto, 2012a). The geothermal heat flux is taken from (Le Brocq et al., 2010). The basal sliding is similar to that of (Schoof, 2005), combining power-law and Coulomb behaviour. The grounding line location is determined using hydrostatic equilibrium and sub-element parameterization (Gladstone et al., 2010; Leguy et al., 2014). The calving front is initialized from present day observations and thereafter is allowed to retreat but not advance. See (Lipscomb et al., 2019) for more information about the model.

#### 10 **A.4 FETI-ULB: fast Elementary Thermomechanical Ice Sheet model (f.ETHISH v1.2)**

The f.ETHISH (fast Elementary Thermomechanical Ice Sheet) model (Pattyn, 2017) is a vertically integrated hybrid (SSA for basal sliding; SIA for grounded ice deformation) finite-difference ice sheet/ice shelf model with vertically-integrated thermomechanical coupling. The transient englacial temperature field is calculated in a 3d fashion. The marine boundary is represented by a grounding-line flux condition according to (Schoof, 2007), coherent a power-law basal sliding (power-law coefficient of 2). Model initialization is based on an adapted iterative procedure based on (Pollard and Deconto, 2012a) to fit the model as close as possible to present-day observed thickness and flow field (Pattyn, 2017). The model is forced by present-day surface mass balance and temperature (Van Wessem et al., 2014), based on the output of the regional atmospheric climate model RACMO2 for the period 1979-2011. The mass-balance-elevation feedback is taken into account and a PDD model for surface melt was employed. Isostatic adjustment was included using an Elastic Lithosphere-Relaxed Asthenosphere (ELRA) model. The PICO model (Reese et al., 2018b) was employed to calculate sub-shelf melt rates, based on present-day observed ocean temperature and salinity (Schmidtke et al., 2014) on which the LARMIP forcings for the different basins are added. The model is run on a regular grid of 16 km with time steps of 0.1 year.

#### **A.5 GRIS-LSC: Grenoble Ice Sheet and Land Ice (GRISLI)**

The GRISLI model is a three-dimensional thermo-mechanically coupled ice sheet model originating from the coupling of the inland ice model of (Ritz, 1992; Ritz et al., 1997) and the ice shelf model of (Rommelaere and Ritz, 1996), extended to the case of ice streams treated as dragging ice shelves (Ritz et al., 2001). In the version used here, over the whole domain, the velocity field consists in the superposition of the shallow-ice approximation (SIA) velocities for ice flow due to vertical shearing and the shallow-shelf approximation (SSA) velocities, used as a sliding law (Bueler and Brown, 2009). For the LARMIP experiments, we used the GRISLI version 2.0 (Quiquet et al., 2018) which includes the analytical formulation of (Schoof, 2007) to compute the flux at the grounding line. Basal drag is computed with a power-law basal friction (Weertman, 1957). For this study, we use an iterative inversion method to infer a spatially variable basal drag coefficient that insures an ice thickness as close as possible to observations with a minimal model drift (Le clec'h et al., 2018). The basal drag is assumed to be constant for the forward experiments. The model uses finite differences on a staggered Arakawa C-grid in the horizontal plane at 16 km resolution with 21 vertical levels. Atmospheric forcing, namely near-surface air temperature and surface mass balance, is taken from the 1979-2014 climatological annual mean computed by the RACMO2.3 regional atmospheric model (Van Wessem et al., 2014). Initial sub-shelf basal melting rates are the regionally-averaged basal melting rates that ensure a minimal ice shelf thickness Eulerian derivative in a forward experiment with constant climate and fixed grounding line position. The initial ice sheet geometry, bedrock and ice thickness, is taken from the Bedmap2 dataset (Fretwell et al., 2013) and the geothermal heat flux is from (Shapiro and Ritzwoller, 2004).

40



#### A.6 IMAU-UU: IMAUICE - IMAU/Utrecht University

The finite difference model (de Boer et al., 2014) uses a combination of SIA and SSA solutions, with velocities added over grounded ice to model basal sliding (Bueler and Brown, 2009). The model grid at 32 km horizontal resolution covers the entire Antarctic ice sheet and surrounding ice shelves. The grounded ice margin is freely evolving, while the shelf extends to the grid margin and a calving front is not explicitly determined. We use the Schoof flux boundary condition (Schoof, 2007) at the grounding line with a heuristic rule following (Pollard and Deconto, 2012b). For the LARMIP experiments, the sea level equation is not solved/ coupled (de Boer et al., 2014).

We run the thermodynamically coupled model with constant present-day boundary conditions to determine a thermodynamic steady state. The model is first initialized with for 100 kyr using the average 1979-2014 SMB and surface ice temperature from RACMO 2.3 (Van Wessem et al., 2014). Bedrock elevation is fixed in time with data taken from the Bedmap2 dataset (Fretwell et al., 2013), and geothermal heat flux data are from (Shapiro and Ritzwoller, 2004). We then run for 30 kyr with constant ice temperature from the first run to get to a dynamic steady state, which is our initial condition. Model setup, parameter settings and initialisation are identical to the IMAUICE submission to initMIP-Antarctica.

#### A.7 ISSM-JPL: Ice Sheet System Model - JPL

The finite element Ice Sheet System Model (Larour et al., 2012) is used with the two-dimensional Shelfy-Stream Approximation (MacAyeal, 1989) over the entire Antarctic ice sheet. The model resolution varies between 1 km along the coast and 50 km in the interior of the domain, with resolution of the ice shelves below 8 km. The model is initialized to match present-day conditions. On grounded ice, the viscosity is derived from a steady-state temperature that does not vary during the simulation, following (Cuffey and Paterson, 2010). The basal friction and the viscosity of floating ice are inferred to best match observed surface velocity (Rignot et al., 2011) using data assimilation (Morlighem et al., 2010). The basal sliding law follows a Budd friction law (Budd et al., 1979) that depends on the ice effective parameterization. The grounding line position is determined using hydrostatic equilibrium, with sub-element parameterization of the friction (Seroussi et al., 2014). The melt rate is applied only for full-floating elements (Seroussi and Morlighem, 2019) and is initialized using mean rates of ocean estimates over the 2004-2015 period (Schodlok et al., 2016), that are kept constant with time. The surface mass balance is from RACMO2.1 1979-2010 mean (Lenaerts et al., 2012). The ice front position is fixed at the extent of the present-day ice sheet. After initialization, the model is relaxed for 2 years, so that the geometry and grounding lines can adjust (Seroussi et al., 2011). For more details on the model and the initialization procedure, we refer to (Schlegel et al., 2018), as we used here a similar procedure.

#### A.8 ISSM-UCI: Ice Sheet System Model - UCI

We use the Ice Sheet System Model (ISSM, (Larour et al., 2012) with a Higher-Order stress balance (Pattyn, 2003). The model resolution varies from 3 km around the coast to 50 km in the interior of the ice sheet, vertically extruded into 10 layers, using a smaller spacing near the bed. The model is initialized using data assimilation of present-day conditions (Morlighem et al., 2013). We perform the inversion of basal friction assuming that the ice is in thermomechanical steady state, based on a Budd friction law (Budd et al., 1979). The ice temperature is updated as the basal friction and internal deformation changes, and the ice viscosity is changed accordingly. At the end of the inversion, basal friction, ice temperature, and stresses are all consistent. After that, the model is run forward assuming that the temperature does not change. We use the surface mass balance is from RACMO2.1 1979-2010 mean (Lenaerts et al., 2012). The grounding line is parameterized using a sub-element friction scheme (Seroussi et al., 2014) and no melt in partially floating elements (Seroussi and Morlighem, 2019). The ice front is fixed through time. More details on the model [with-beis](#) available in the ISMIP6 Antarctic article, coming soon.

#### **A.9 MALI-LANL: Model for prediction across scales – Albany Land Ice**

MPAS-Albany Land Ice (MALI) (Hoffman et al., 2018) uses a three-dimensional, first-order Stokes approximation (“Blatter-Pattyn”) momentum balance solver using finite element methods. Ice velocity is solved on a two-dimensional, map plane triangulation extruded vertically to form tetrahedra. Mass and tracer transport occur on the Voronoi dual mesh using a mass-conserving, finite volume, first-order upwinding scheme. To ensure that the grounding line is captured by adequate spatial resolution even under full retreat of West Antarctica (or large parts of East Antarctica), mesh resolution is 2 km along grounding lines and in all marine regions of West Antarctica, and in marine regions of East Antarctica where present day ice thickness is less than 2500 m. Mesh resolution coarsens to 20 km in the ice sheet interior and is no greater than 6 km within the large ice shelves. The horizontal mesh has 1.6 million cells. The mesh uses 10 vertical layers that are finest near the bed (4% of total thickness) and coarsen towards the surface (23% of total thickness). Ice temperature is based on results from (Van Liefferinge and Pattyn, 2013) and held fixed in time. The model uses a linear basal friction law with spatially-varying basal friction coefficient. The basal friction of grounded ice and the viscosity of floating ice are inferred to best match observed surface velocity (Rignot et al., 2011) using an adjoint-based optimization method (Perego et al., 2014) and then kept constant in time. The grounding line position is determined using hydrostatic equilibrium, with a sub-element parameterization of the friction (analogous to SE3 from (Seroussi et al., 2014)). Sub-ice-shelf melt rates come from (Rignot et al., 2013) and are extrapolated across the entire model domain to provide non-zero ice shelf melt rates after grounding line retreat. The surface mass balance is the 1979-2010 mean from RACMO2.1 (Lenaerts et al., 2012). Maps of surface and basal mass balance forcing are kept constant with time. The ice shelf calving front positions are fixed at the extent of their present-day observations. To minimize large, non-physical transients resulting from the optimization procedure, the model is first relaxed by integrating forward in time for a century under steady forcing. During this time the model velocities, geometry, and grounding lines are free to adjust as needed.

#### **A.10 PISM-AWI: Parallel Ice Sheet Model - AWI**

The Parallel Ice Sheet Model (Bueler and Brown, 2009; Winkelmann et al., 2011) in the hybrid shallow approximation is applied at 16 km resolution over the entire Antarctic Ice Sheet. The model is initialized via a 100 ka equilibrium type spinup with steady present day climate and fixed bedrock topography. The initial geometry is Bedmap2 (Fretwell et al., 2013). Basal friction is parameterized by the water content in the till and the depth of the ice base. Basal sliding is calculated via a pseudo-plastic friction law (Bueler and Brown, 2009; Winkelmann et al., 2011) depending on the yield strength of the till and the stored basal water. The grounding line is determined by hydrostatic equilibrium with a sub-grid parameterization of basal conditions (Feldmann et al., 2014b). Both grounding line and ice shelf front can freely evolve in the spinup and the projections. Calving is governed by strain rate (Eigencalving, (Levermann et al., 2012)) and ice shelf thickness (thickness calving). Calving is further applied if the ice extends over the continental shelf (seafloor below -2000m). The melt rate underneath ice shelves is applied only to fully floating cells (no sub-grid basal melt) and calculated via the local difference between ocean temperature and pressure melting point. In the Amundsen and Bellingshausen Sea as well as underneath the Filchner Ice Shelf melt rates are modified by a scaling factor to better fit present day patterns. Local ocean temperature is derived via extrapolation of 3D ocean temperature fields from the World Ocean Atlas 2009 (Locarnini et al., 2013) for present day. Present day surface mass balance and ice surface temperature are from RACMO2.3 (Van Wessem et al., 2014).

#### A.11 PISM-DMI: Danish Meteorological Institute's Parallel Ice Sheet Model

The used Parallel Ice Sheet Model (PISM, version 0.7) utilizes a hybrid system (Bueler and Brown, 2009) combining the Shallow Ice Approximation (SIA) and Shallow Shelf Approximation (SSA) on an equidistant polar stereographic grid of 16 km. The basal resistance is described as plastic till for which the yield stress is given by a Mohr-Coulomb formula (Bueler and Brown, 2009; Schoof, 2006). Assuming an ocean temperature of  $-1.7^{\circ}\text{C}$  and constant melting factor ( $F_{\text{melt}}=0.001$ ) sub-shelf melting follows equation (57) in (Martin et al., 2011) and occurs only for fully floating grid points, while the grounding line position is determined on a sub-grid space (Feldmann et al., 2014a). The calving parameterization incorporates three sub-schemes: at the ice shelf margin calving occurs when the thickness is less than 150 m; ice shelves that extend into the depth ocean disintegrate; the stress field evaluating Eigen-calving parameterization with the proportionality constant of  $5 \cdot 10^{17}$  (Levermann et al., 2012). Monthly atmospheric forcing deduced from sub-daily ERA-Interim reanalysis products (Berrisford et al., 2011; Dee et al., 2011) covers the period 1979-2012. Its 2-metre air temperature determines the ice surface temperature, while the total precipitation is considered as snow accumulation due to negligible surface melting in Antarctica. This forcing has been applied to match present-day conditions during spin-up, where grounded ice margins, grounding lines and calving fronts evolve freely.

#### A.12 PISM-PIK: Potsdam Parallel Ice Sheet Model

The Parallel Ice Sheet Model (Winkelmann et al., 2011)(www.pism-docs.org; dev version c10a3a6e (June 3rd, 2018) based on v1.0 with added basal melt modifier) uses a hybrid of the Shallow-Ice Approximation (SIA) and the two-dimensional Shelfy-Stream Approximation of the stress balance (SSA; (Bueler and Brown, 2009; MacAyeal, 1989)) over the entire Antarctic Ice Sheet. Here we use a plastic sliding law, which is independent of ice base sliding velocity. The model domain is discretized on a regular rectangular grid with 4 km horizontal resolution and a vertical resolution between 48 m at the top of the domain at 6000 m and 7 m at the base of the ice. The model is initialized from Bedmap2 geometry (Fretwell et al., 2013) with model parameters (e.g. enhancement factors for SIA and SSA, here both equal 1) that minimize dynamic changes over 600 years of constant present-day climatic conditions (no equilibrium spin-up). PISM is a thermomechanically-coupled (polythermal) model based on the Glen-Paterson-Budd-Lliboutry-Duval flow law (Aschwanden et al., 2012), such that the enthalpy can evolve freely for given boundary conditions. Basal melt water is stored in the till. The Mohr-Coulomb criterion relates the yield stress by parameterizations of till material properties to the effective pressure on the saturated till (Bueler and van Pelt, 2015). Till friction angle is a shear strength parameter for the till material property and is optimized iteratively in the grounded region such that mismatch of equilibrium and modern surface elevation (8 km) is minimized (analogous to the friction coefficient in (Pollard and Deconto, 2012a)). The grounding line position is determined using hydrostatic equilibrium, with sub-grid interpolation of the friction (Feldmann et al., 2014b). The melt rate is not interpolated across the grounding line and is calculated with the Potsdam Ice-shelf Cavity model (PICO; (Reese et al., 2018b)) which calculates melt patterns underneath the ice shelves for given ocean conditions, here mean values over the observational period 1975-2012 (Schmidtke et al., 2014). The basin mean ocean temperature in the Amundsen region of  $0.46^{\circ}\text{C}$  has been corrected to a lower value of  $-0.37^{\circ}\text{C}$ , as average from in the neighboring Getz Ice Shelf basin, assuming that colder conditions have been prevalent in the pre-industrial period. In the experiments basal melt offsets are added to the evolving PICO melt rate pattern, while basal melt is only for full-floating grid cells. The near-surface climate, surface mass balance and ice surface temperature is from RACMO2.3p2 1986-2005 mean (van Wessem et al., 2018) remapped from 27 km resolution. The calving front position can freely evolve using the Eigencalving parameterization (Levermann et al., 2012) with  $K = 1e17 \text{ m s}$  and a terminal thickness threshold of 200 m.

### A.13 PISM-VUW: Parallel Ice Sheet Model - VUW

We use the Parallel Ice Sheet Model (PISM) version 0.7.1. PISM is a ‘hybrid’ ice sheet / shelf model that combines shallow approximations of the flow equations that compute gravitational flow and flow by horizontal stretching (Bueler and Brown, 2009). The combined stress balance allows for a treatment of ice sheet flow that is consistent across non-sliding grounded ice to rapidly-sliding grounded ice (ice streams) and floating ice (shelves). As with most continental-scale ice sheet models, we use flow enhancement factors for the shallow-ice and shallow-shelf components of the stress regime (3.5 and 0.5 respectively), which allow us to adjust creep and sliding velocities using simple coefficients. By doing so we are able to optimize simulations such that modelled behaviour is consistent with observed behaviour. The junction between grounded and floating ice is refined by a sub-grid scale parameterization (Feldmann et al., 2014b) that smooths the basal shear stress field and tracks an interpolated grounding-line position through time. This allows for much more realistic grounding-line motion, even with relatively coarse spatial grids, such as the 16 km grid used in our experiments. Surface mass balance is calculated using a positive degree day model that takes as inputs air temperature and precipitation from RACMO2.1 (Lenaerts et al., 2012). In previous simulations (e.g. (Golledge et al., 2015)) we have derived evolving melt beneath ice shelves from the thermodynamic three-equation model of (Hellmer and Olbers, 1989), in which the melt rate is primarily controlled by salinity and temperature gradients across the ice–ocean interface. For the simplified experiments presented here, however, we set a spatially uniform melt rate as an initial condition and allow our modelled ice sheet to evolve in response to this. All of our simulations are initialized from a thermally and dynamically evolved state that represents the present-day ice sheet configuration and has a sea-level equivalent volume of 58.35 m. We also run a control experiment, in which no additional basal melt is applied, and which increases in volume by 0.05 m over 200 years.

### 20 A.14 PS3D-PSU: Penn State University 3-D ice sheet model (PSUICE3D)

The model is described in detail in (Pollard and Deconto, 2012b), with updates in (Pollard et al., 2015). The dynamics use a hybrid combination of vertically averaged SIA and SSA scaling. Floating ice shelves and grounding-line migration are included, with sub-grid interpolation for grounding-line position. The (Schoof, 2007) boundary-layer formulation is imposed as a condition on ice velocity across the grounding line, which enables grounding-line migration to be simulated reasonably accurately without much higher grid resolution. The model includes standard equations for the evolution of ice thickness, and internal ice temperatures with 10 unevenly spaced vertical layers. Bedrock deformation under the ice load is modeled as an elastic lithospheric plate above local isostatic relaxation (ELRA). Basal sliding follows a Weertman-type power law, occurring only where the bed is close to the melt point. Basal sliding coefficients are determined by an inverse method (Pollard and Deconto, 2012a), iteratively matching ice surface elevations to modern observations. Calving of ice shelves depends on combined depths of surface and basal crevasses, relative to the ice-shelf thickness. Crevasse depths depend primarily on the divergence of the ice velocity. The recently proposed mechanisms of hydrofracturing by surface meltwater, and structural failure of large ice cliffs (Deconto and Pollard, 2016; Pollard et al., 2015), are not enabled for the LARMIP experiments. Oceanic melting at the base of ice shelves depends on the squared difference between nearby 400-m depth climatological ocean temperature (Levitus et al., 2012), and the melt point at the bottom of the ice. Atmospheric temperatures and precipitation are obtained from the ALBMAP climatology (Le Brocq et al., 2010), with an imposed sinusoidal cycle for monthly air temperatures. A simple box model based on Positive Degree Days is used to compute annual surface mass balance, allowing for refreezing of meltwater. For the LARMIP experiments the model grid size is 16 km, and the control is spun up to equilibrium using perpetual modern climate forcing.

**A.15 SICO-ILTS: SICOPOLIS (Simulation Code for POLythermal Ice Sheets)Ice sheet model SICOPOLIS**

The model SICOPOLIS version 5-dev ([www.sicopolis.net](http://www.sicopolis.net)) is applied to the Antarctic ice sheet with hybrid shallow-ice-shelfy-stream dynamics for grounded ice. The model SICOPOLIS version 5-dev ([www.sicopolis.net](http://www.sicopolis.net)) is applied to the Antarctic ice sheet with hybrid shallow-ice-shelfy-stream dynamics for grounded ice (Bernales et al., 2017) and shallow-shelf dynamics for floating ice. Ice thermodynamics is treated with the melting-CTS enthalpy method (ENTM) by and shallow-shelf dynamics for floating ice. Ice thermodynamics is treated with the melting-CTS enthalpy method (ENTM) by (Greve and Blatter, 2016). The ice surface is assumed to be traction-free. Basal sliding under grounded ice is described by a Weertman-type sliding law with sub-melt sliding. The ice surface is assumed to be traction-free. Basal sliding under grounded ice is described by a Weertman-type sliding law with sub-melt sliding in the form of (Sato and Greve, 2012) and subglacial hydrology (Calov et al., 2018; Kleiner and Humbert, 2014). The basal sliding coefficient is chosen differently for the 18 IMBIE-2016 basins (Rignot and Mouginot, 2016) to optimize the agreement between simulated and observed present-day surface velocities (Greve et al., 2019). The model is initialized to the reference year 1990 by a paleoclimatic spin-up over 140000 years, forced by Vostok  $\delta D$  converted to  $\Delta T$ . The model is initialized by a paleoclimatic spin-up over 140000 years, forced by Vostok  $\delta D$  converted to  $\Delta T$  (Petit et al., 1999), in which the topography is nudged towards the present-day topography to enforce a good agreement. In the future climate simulations, the ice topography evolves freely. For the last 2000 years of the spin-up and all future climate simulations, a regular (structured) grid with 8 km resolution is used. In the vertical, we use terrain-following coordinates with 81 layers in the ice domain and 41 layers in the thermal lithosphere layer below. The present-day surface temperature is parameterized in which the topography is nudged towards the present day topography to enforce a good agreement. In the future climate simulations, the ice topography evolves freely. For the last 2000 years of the spin-up and the future climate simulations, a regular (structured) grid with 8 km resolution is used. In the vertical, we use terrain-following coordinates with 81 layers in the ice domain and 41 layers in the thermal lithosphere layer below. The present-day surface temperature is parameterized (Fortuin and Oerlemans, 1990), the present-day precipitation is by (Arthern et al., 2006) and (Le Brocq et al., 2010), runoff is modelled by the positive-degree-day method with the parameters by (Sato and Greve, 2012). The 1960–1989 average SMB correction that results diagnostically from the nudging technique is used as a prescribed SMB correction for the future climate simulations. The bed topography is Bedmap2 (Fretwell et al., 2013), and the geothermal heat flux is by (Martos et al., 2017), and isostatic adjustment is included using an elastic-lithosphere-relaxing-asthenosphere (ELRA) model (parameters by (Sato and Greve, 2012), (Prukeker, 2012)). Present-day ice-shelf basal melting is parameterized by the ISMIP6 standard approach, a non-local quadratic melting parameterization that depends on the thermal forcing (ocean temperature minus freezing temperature) at the ice/ocean interface and is tuned separately for the IMBIE-2016 basins ([tinyurl.com/ismip6-wiki-ais](http://tinyurl.com/ismip6-wiki-ais)). The LARMIP forcings (1, 2, 4, 8, 16 and 32 m/yr) for the five oceanic sectors are added to this parameterization.

Present day ice shelf basal melting is parameterized as a function of both the depth of ice below mean sea level and ocean temperatures outside the ice shelf fronts at 500 metres depth, tuned differently for eight Antarctic sectors (Greve and Galton-Fenzi, 2017).

**A.16 UA-UNN: University of Northumbria, Newcastle upon Tyne, UK**

Úa is a finite-element ice-flow model (<https://github.com/GHilmarG/UaSource/>) that solves the momentum and mass conservation equations in a vertically integrated form using the shallow ice-stream approximation (SSA) (Gudmundsson et al., 2012). The transient evolution of the geometry is solved in a fully implicit manner, i.e. implicitly with respect to both velocities and ice thickness. The model uses automated mesh refinement and coarsening based on user-specified criteria. In

the runs used in the study, mesh resolution ranged from about 1 to 40 km. Weertman sliding law and the Glen's flow law were used to describe basal sliding and ice rheology, respectively. Here the stress exponents of both laws were set to 3. Spatial variations in sliding coefficient ( $C$  in Weertman sliding law) and rate factor ( $A$  in Glen's flow law) were determined by conducting an inversion using the adjoint method with horizontal velocities as measurements using Tikhonov regularisation on both amplitudes and second spatial derivatives. The ocean model MITgcm (Massachusetts Institute of Technology general circulation model, <http://mitgcm.org/>) has recently been coupled to Úa (De Rydt et al., 2016). All runs presented were conducted by the co-author J. Jordan.

## References

- Arthern, R. J., Winebrenner, D. P. and Vaughan, D. G.: Antarctic snow accumulation mapped using polarization of 4.3-cm wavelength microwave emission, *J. Geophys. Res. Atmos.*, 111(D6), 1–10, doi:10.1029/2004JD005667, 2006.
- Arthern, R. J. R. ~J., Hindmarsh, R. ~C. ~A. C. A. R. C. A., Williams, C. R., Bingham, R. G. J. R. J., Ferraccioli, F., King, E. ~C. C. E. C., Larter, R. D. R. ~D., Pritchard, H. ~D. D. H. D., Smith, A. M., Vaughan, D. G. D. ~G. G. D. G., Bueller, E. E. ~D., Brown, J., Cornford, S. L., Martin, D. F., Payne, A. J. A. J. A. ~J. J., Ng, E. G., Le Brocq, A. M., Gladstone, R. M. R. ~M. M., Edwards, T. L., Shannon, S. R., Agosta, C., van den Broeke, M. R. M. ~R. R., Hellmer, H. H. ~H. H., Krinner, G., Ligtenberg, S. R. M. S. ~R. ~M. R. M. S. R. M., Timmermann, R., Vaughan, D. G. D. ~G. G. D. G., Depoorter, M. a, Bamber, J. L. J. ~L. L., Griggs, J. a., Lenaerts, J. T. M. J. ~T. ~M., Ligtenberg, S. R. M. S. ~R. ~M. R. M. S. R. M., van den Broeke, M. R. M. ~R. R., Moholdt, G., Dutrieux, P., De Rydt, J., Jenkins, A., Holland, P. R., Ha, H. K., Lee, S. H., Steig, E. J. E. ~J. J., Ding, Q., Abrahamsen, E. P., Schröder, M., Favier, L., Durand, G., Cornford, S. L., Gudmundsson, G. ~H. H., Gagliardini, O., Gillet-Chaulet, F., Zwinger, T., Payne, A. J. A. J. A. ~J. J., Le Brocq, A. M., Flament, T., Rémy, F., Fretwell, P., Pritchard, H. ~D. D. H. D., Vaughan, D. G. D. ~G. G. D. G., Bamber, J. L. J. ~L. L., Barrand, N. E., Bell, R. E. R. ~E., Bianchi, C., Bingham, R. G. J. R. J., Blankenship, D. ~D. D., Casassa, G., Catania, G. A., Callens, D., Conway, H., Cook, A. ~J. J., Corr, H. ~F. ~J. F. J. H. F. J., Damaske, D., Damm, V., Ferraccioli, F., Forsberg, R., Fujita, S., Gim, Y., Gogineni, P., Griggs, J. a., Hindmarsh, R. ~C. ~A. C. A. R. C. A., Holmlund, P., Holt, J. ~W. W., Jacobel, R. W., Jenkins, A., Jokat, W., Jordan, T., King, E. ~C. C. E. C., Kohler, J., Krabill, W., Riger-Kusk, M., Langley, K. a., Leitchenkov, G., Leuschen, C., Luyendyk, B. P., Matsuoka, K., Mougnot, J., Nitsche, F. ~O. O., Nogi, Y., Nost, O. a., Popov, S. V., et al.: Stronger ocean circulation and increased melting under Pine Island Glacier ice shelf, *Cryosph.*, 5(4), 1576–1584, doi:10.1002/2013GL059069.1., 2014.
- Aschwanden, A., Bueller, E., Khroulev, C. and Blatter, H.: An enthalpy formulation for glaciers and ice sheets, *J. Glaciol.*, 58(209), 441–457, doi:10.3189/2012JoG11J088, 2012.
- Bakker, A. M. R., Wong, T. E., Ruckert, K. L. and Keller, K.: Sea-level projections representing the deeply uncertain contribution of the West Antarctic ice sheet, *Sci. Rep.*, 7(1), 3880, doi:10.1038/s41598-017-04134-5, 2017.
- Bamber, J. J. L., Oppenheimer, M., Kopp, R. E., Aspinall, W. P. and Cooke, R. M.: Ice sheet contributions to future sea-level rise from structured expert judgement, *Proc. Natl. Acad. Sci.*, in review, 1–6, doi:10.1073/pnas.1817205116, 2019.
- Bamber, J. L. and Aspinall, W. P.: An expert judgement assessment of future sea level rise from the ice sheets, *Nat. Clim. Chang.*, 2(12), 1–4, doi:10.1038/nclimate1778, 2013.
- Beckmann, a and Goosse, H.: A parameterization of ice shelf – ocean interaction for climate models, *Ocean Model.*, 5, 157–170, doi:10.1016/S1463-5003(02)00019-7, 2003.
- van de Berg, W. J., van den Broeke, M. R., Reijmer, C. H. and van Meijgaard, E.: Reassessment of the Antarctic surface mass balance using calibrated output of a regional atmospheric climate model, *J. Geophys. Res. Atmos.*, 111(11), 1–15, doi:10.1029/2005JD006495, 2006.
- Bernales, J., Rogozhina, I., Greve, R. and Thomas, M.: Comparison of hybrid schemes for the combination of shallow approximations in numerical simulations of the Antarctic Ice Sheet, *Cryosphere*, 11(1), 247–265, doi:10.5194/tc-11-247-2017, 2017.
- Berrisford, P., Dee, D., Fielding, K., Fuentes, M., Kallberg, P., Kobayashi, S. and Uppala, S.: The ERA-Interim archive Version 2.0, ECMWF, Reading, UK. [online] Available from: [http://old.ecmwf.int/publications/library/ecpublications/\\_pdf/era/era\\_report\\_series/RS\\_1\\_v2.pdf](http://old.ecmwf.int/publications/library/ecpublications/_pdf/era/era_report_series/RS_1_v2.pdf), 2011.
- Bindschadler, R., Nowicki, S., Abe-OUCHI, A., Aschwanden, A., Choi, H., Fastook, J., Granzow, G., Greve, R., Gutowski, G., Herzfeld, U., Jackson, C., Johnson, J., Khroulev, C., Levermann, A., Lipscomb, W. H., Martin, M. A., Morlighem, M., Parizek, B. R., Pollard, D., Price, S. F., Ren, D., Saito, F., Sato, T., Seddik, H., Seroussi, H., Takahashi, K., Walker, R. and

- Wang, W. L.: Ice-sheet model sensitivities to environmental forcing and their use in projecting future sea level (the SeaRISE project), *J. Glaciol.*, 59(214), 195–224, doi:10.3189/2013JoG12J125, 2013.
- de Boer, B., Stocchi, P. and van de Wal, R. S. W.: A fully coupled 3-D ice-sheet-sea-level model: algorithm and applications, *Geosci. Model Dev.*, 7(5), 2141–2156, doi:10.5194/gmd-7-2141-2014, 2014.
- 5 Le Brocq, A. M., Payne, A. J. and Vieli, A.: An improved Antarctic dataset for high resolution numerical ice sheet models (ALBMAPv1), *Earth Syst. Sci. Data*, 2, 247–260, doi:10.5194/essd-2-247-2010, 2010.
- Budd, W. -F., Keage, P. L. and Blundy, N. A.: Empirical studies of ice sliding, *J. Glaciol.*, 23, 157–170, 1979.
- Bueler, E. and Brown, J.: Shallow shelf approximation as a “sliding law” in a thermomechanically coupled ice sheet model, *J. Geophys. Res. Earth Surf.*, 114(F3), 1–21, doi:10.1029/2008JF001179, 2009.
- 10 Bueler, E. and van Pelt, W.: Mass-conserving subglacial hydrology in the {Parallel} {Ice} {Sheet} {Model} version 0.6, *Geosci. Model Dev.*, 8(6), 1613–1635, doi:10.5194/gmd-8-1613-2015, 2015.
- Calov, R., Beyer, S., Greve, R., Beckmann, J., Willeit, M., Kleiner, T., Rückamp, M., Humbert, A. and Ganopolski, A.: Simulation of the future sea level contribution of Greenland with a new glacial system model, *Cryosph.*, 12(10), 3097–3121, doi:10.5194/tc-12-3097-2018, 2018.
- 15 Church, J. A., Clark, P. U., Cazenave, A., Gregory, J. M., Jevrejeva, S., Levermann, A., Merrifield, M. A., Milne, G. A., Nerem, R. S., Nunn, P. D., Payne, A. J., Pfeffer, W. T., Stammer, D. and Unnikrishnan, A. S.: Chapter 13: Sea Level Change, in *Climate Change 2013: The Physical Science Basis. Contribution of Working Group I to the Fifth Assessment Report of the Intergovernmental Panel on Climate Change*, edited by T. F. Stocker, D. Qin, G.-K. Plattner, M. Tignor, S.K. Allen, J. Boschung, A. Nauels, Y. Xia, V. Bex and P.M. Midgley, pp. 1–121, Cambridge University Press, Cambridge, United Kingdom and New York, NY, USA., Cambridge, United Kingdom and New York, NY, USA., 2013.
- 20 Clapeyron, M. C.: Mémoire sur la puissance motrice de la chaleur, *J. l'École Polytech.*, 23, 153–190, doi:ark:/12148/bpt6k4336791/f157, 1834.
- Clausius, R.: Ueber die bewegende Kraft der Wärme und die Gesetze, welche sich daraus für die Wärmelehre selbst ableiten lassen, *Ann. Phys.*, 155(4), 500–524, doi:10.1002/andp.18501550403, 1850.
- 25 Le clec’h, S., Quiquet, A., Charbit, S., Dumas, C., Kageyama, M. and Ritz, C.: A rapidly converging spin-up method for the present-day Greenland ice sheet using the GRISLI ice-sheet model, *Geosci. Model Dev. Discuss.*, 2018, 1–21, doi:10.5194/gmd-2017-322, 2018.
- Le clec’h, S., Charbit, S., Quiquet, A., Fettweis, X., Dumas, C., Kageyama, M., Wyard, C. and Ritz, C.: Assessment of the Greenland ice sheet–atmosphere feedbacks for the next century with a regional atmospheric model coupled to an ice sheet
- 30 model, *Cryosph.*, 13(1), 373–395, doi:10.5194/tc-13-373-2019, 2019.
- Cornford, S. L., Martin, D. F., Graves, D. T., Ranken, D. F., Le Brocq, A. M., Gladstone, R. M., Payne, A. J., Ng, E. G. and Lipscomb, W. H.: Adaptive mesh, finite volume modeling of marine ice sheets, *J. Comput. Phys.*, 232(1), 529–549, 2013.
- Cornford, S. L., Martin, D. F., Payne, A. J., Ng, E. G., Le Brocq, A. M., Gladstone, R. M., Edwards, T. L., Shannon, S. R., Agosta, C., Van Den Broeke, M. R., Hellmer, H. H., Krinner, G., Ligtenberg, S. R. M. M., Timmermann, R. and Vaughan, D. G.: Century-scale simulations of the response of the West Antarctic Ice Sheet to a warming climate, *Cryosphere*, 9(4), 1579–1600, doi:10.5194/tc-9-1579-2015, 2015.
- 35 Cornford, S. L., Martin, D. F., Lee, V., Payne, A. J. and Ng, E. G.: Adaptive mesh refinement versus subgrid friction interpolation in simulations of Antarctic ice dynamics, *Ann. Glaciol.*, 57(73), doi:10.1017/aog.2016.13, 2016.
- Cuffey, K. M. and Paterson, W. S. B.: *The Physics of Glaciers*, 4th Edition, 4th editio., edited by Butterworth-Heinemann, Academic Press., 2010.
- Dangendorf, S., Hay, C. C., Calafat, F. M., Marcos, M., Berk, K. and Jensen, J.: Persistent acceleration in global sea-level rise since the 1970s, , in review, 2019.
- De Rydt, J., Gudmundsson, G. H., De Rydt, J. and Gudmundsson, G. H.: Coupled ice shelf-ocean modeling and complex



- grounding line retreat from a seabed ridge, *J. Geophys. Res. Earth Surf.*, 121(5), 865–880, doi:10.1002/2015JF003791, 2016.
- Deconto, R. M. and Pollard, D.: Contribution of Antarctica to past and future sea-level rise, *Nature*, 531, 591–597, doi:10.1038/nature17145, 2016.
- Dee, D. P., Uppala, S. M., Simmons, A. J., Berrisford, P., Poli, P., Kobayashi, S., Andrae, U., Balmaseda, M. A., Balsamo, G., Bauer, P., Bechtold, P., Beljaars, A. C. M., van de Berg, L., Bidlot, J., Bormann, N., Delsol, C., Dragani, R., Fuentes, M., Geer, A. J., Haimberger, L., Healy, S. B., Hersbach, H., Hólm, E. V., Isaksen, I., Kållberg, P., Köhler, M., Matricardi, M., McNally, A. P., Monge-Sanz, B. M., Morcrette, J.-J., Park, B.-K., Peubey, C., de Rosnay, P., Tavolato, C., Thépaut, J.-N. and Vitart, F.: The ERA-Interim reanalysis: configuration and performance of the data assimilation system, *Q. J. R. Meteorol. Soc.*, 137(656), 553–597, doi:10.1002/qj.828, 2011.
- Depoorter, M. A., Bamber, J. L., Griggs, J. A., Lenaerts, J. T. M., Ligtgenberg, S. R. M., Van Den Broeke, M. R. and Moholdt, G.: Calving fluxes and basal melt rates of Antarctic ice shelves, *Nature*, 502(7469), 89–92, doi:10.1038/nature12567, 2013.
- Edwards, T. L., Brandon, M. A., Durand, G., Edwards, N. R., Golledge, N. R., Holden, P. B., Nias, I. J., Payne, A. J., Ritz, C. and Wernecke, A.: Revisiting Antarctic ice loss due to marine ice-cliff instability, *Nature*, 566(7742), 58–64, doi:10.1038/s41586-019-0901-4, 2019.
- Favier, L., Durand, G., Cornford, S. L., Gudmundsson, G. H., Gagliardini, O., Gillet-Chaulet, F., Zwinger, T., Payne, A. J. and Le Brocq, a. M.: Retreat of Pine Island Glacier controlled by marine ice-sheet instability, *Nat. Clim. Chang.*, 5(2), 117–121, doi:10.1038/nclimate2094, 2014.
- Feldmann, J. and Levermann, A.: Collapse of the West Antarctic Ice Sheet after local destabilization of the Amundsen Basin, *Proc. Natl. Acad. Sci.*, 112(46), 14191–14196, doi:10.1073/pnas.1512482112, 2015.
- Feldmann, J., Albrecht, T., Khroulev, C., Pattyn, F. and Levermann, A.: Resolution-dependent performance of grounding line motion in a shallow model compared to a full-{Stokes} model according to the {MISMIP}3d intercomparison, *J. Glaciol.*, 60(220), 353–360, doi:10.3189/2014JoG13J093, 2014a.
- Feldmann, J., Albrecht, T., Khroulev, C., Pattyn, F. and Levermann, A.: Resolution-dependent performance of grounding line motion in a shallow model compared to a full-Stokes model according to the MISMIP3d intercomparison, *J. Glaciol.*, 60(220), 353–360, doi:10.3189/2014JoG13J093, 2014b.
- Fortuin, J. P. F. and Oerlemans, J.: Parameterization of the annual surface temperature and mass balance of Antarctica, *Ann. Glaciol.*, 14, 78–84, 1990.
- Fretwell, P., Pritchard, H. D., Vaughan, D. G., Bamber, J. L., Barrand, N. E., Bell, R., Bianchi, C., Bingham, R. G., Blankenship, D. D., Casassa, G., Catania, G., Callens, D., Conway, H., Cook, A. J., Corr, H. F. J., Damaske, D., Damm, V., Ferraccioli, F., Forsberg, R., Fujita, S., Gim, Y., Gogineni, P., Griggs, J. A., Hindmarsh, R. C. A., Holmlund, P., Holt, J. W., Jacobel, R. W., Jenkins, A., Jokat, W., Jordan, T., King, E. C., Kohler, J., Krabill, W., Riger-Kusk, M., Langley, K. A., Leitchenkov, G., Leuschen, C., Luyendyk, B. P., Matsuoka, K., Mougnot, J., Nitsche, F. O., Nogi, Y., Nost, O. A., Popov, S. V., Rignot, E., Rippon, D. M., Rivera, A., Roberts, J., Ross, N., Siegert, M. J., Smith, A. M., Steinhage, D., Studinger, M., Sun, B., Tinto, B. K., Welch, B. C., Wilson, D., Young, D. A., Xiangbin, C. and Zirizzotti, A.: Bedmap2: improved ice bed, surface and thickness datasets for Antarctica, *Cryosphere*, 7(1), 375–393, doi:10.5194/tc-7-375-2013, 2013.
- Frieler, K., Clark, P. U., He, F., Buizert, C., Reese, R., Ligtgenberg, S. R. M., Van Den Broeke, M. R., Winkelmann, R. and Levermann, A.: Consistent evidence of increasing Antarctic accumulation with warming, *Nat. Clim. Chang.*, 5(4), 348–352, doi:10.1038/nclimate2574, 2015.
- Gladstone, R. M., Payne, A. J. and Cornford, S. L.: Parameterising the grounding line in flow-line ice sheet models, *Cryosphere*, 4(4), 605–619, doi:10.5194/tc-4-605-2010, 2010.
- Gladstone, R. M., Lee, V., Rougier, J., Payne, A. J., Hellmer, H., Le Brocq, A., Shepherd, A., Edwards, T. L., Gregory, J. and Cornford, S. L.: Calibrated prediction of Pine Island Glacier retreat during the 21st and 22nd centuries with a coupled

- flowline model, *Earth Planet. Sci. Lett.*, 333–334, 191–199, doi:10.1016/j.epsl.2012.04.022, 2012.
- Goelzer, H., Huybrechts, P., Loutre, M.-F. and Fichefet, T.: Last Interglacial climate and sea-level evolution from a coupled ice sheet–climate model, *Clim. Past*, 12(12), 2195–2213, doi:10.5194/cp-12-2195-2016, 2016.
- Goelzer, H., Nowicki, S., Edwards, T., Beckley, M., Abe-Ouchi, A., Aschwanden, A., Calov, R., Gagliardini, O., Gillet-Chaulet, F., Gollledge, N. R., Gregory, J., Greve, R., Humbert, A., Huybrechts, P., Kennedy, J. H., Larour, E., Lipscomb, W. H., Le clec'h, S., Lee, V., Morlighem, M., Pattyn, F., Payne, A. J., Rodehacke, C., Rückamp, M., Saito, F., Schlegel, N., Seroussi, H., Shepherd, A., Sun, S., van de Wal, R. and Ziemen, F. A.: Design and results of the ice sheet model initialisation experiments initMIP-Greenland: an ISMIP6 intercomparison, *Cryosph. Discuss.*, (July), 1–42, doi:10.5194/tc-2017-129, 2017.
- 10 Goldberg, D. N.: A variationally derived, depth-integrated approximation to a higher-order glaciological flow model, *J. Glaciol.*, 57(201), 157–170, doi:10.3189/002214311795306763, 2011.
- Gollledge, N. R., Kowalewski, D. E., Naish, T. R., Levy, R. H., Fogwill, C. J. and Gasson, E. G. W. W.: The multi-millennial Antarctic commitment to future sea-level rise, *Nature*, 526(7573), 421–425, doi:10.1038/nature15706, 2015.
- Gollledge, N. R., Keller, E. D., Gomez, N., Naughten, K. A., Bernales, J., Trusel, L. D. and Edwards, T. L.: Global environmental consequences of twenty-first-century ice-sheet melt, *Nature*, 566(7742), 65–72, doi:10.1038/s41586-019-0889-9, 2019.
- 15 Gong, Y., Cornford, S. L. and Payne, a. J.: Modelling the response of the Lambert Glacier–Amery Ice Shelf system, East Antarctica, to uncertain climate forcing over the 21st and 22nd centuries, *Cryosph.*, 8(3), 1057–1068, doi:10.5194/tc-8-1057-2014, 2014.
- 20 Good, P., Gregory, J. M. and Lowe, J. A.: A step-response simple climate model to reconstruct and interpret AOGCM projections, *Geophys. Res. Lett.*, 38(1), 1–5, doi:10.1029/2010GL045208, 2011.
- Greenbaum, J. S., Blankenship, D. D., Young, D. a, Richter, T. G., Roberts, J. L., Aitken, a R. a, Legresy, B., Schroeder, D. M., Warner, R. C., van Ommen, T. D. and Siegert, M. J.: Ocean access to a cavity beneath Totten Glacier in East Antarctica, *Nat. Geosci.*, 8(March), 1–5, doi:10.1038/NGEO2388, 2015.
- 25 Greve, R. and Blatter, H.: Comparison of thermodynamics solvers in the polythermal ice sheet model SICOPOLIS, *Polar Sci.*, 10(1), 11–23, doi:10.1016/j.polar.2015.12.004, 2016.
- Gudmundsson, G. H., Krug, J., Durand, G., Favier, L. and Gagliardini, O.: The stability of grounding lines on retrograde slopes, *Cryosph.*, 6(6), 1497–1505, doi:10.5194/tc-6-1497-2012, 2012.
- Hay, C. C., Morrow, E., Kopp, R. E. and Mitrovica, J. X.: Probabilistic reanalysis of twentieth-century sea-level rise, *Nature*, 517(7535), 481–484, doi:10.1038/nature14093, 2015.
- 30 Hellmer, H. H. and Olbers, D. J.: A two-dimensional model for the thermohaline circulation under an ice shelf, *Antarct. Sci.*, 1, 325–336, 1989.
- Hellmer, H. H., Kauker, F., Timmermann, R., Determann, J. and Rae, J.: Twenty-first-century warming of a large Antarctic ice-shelf cavity by a redirected coastal current, *Nature*, 485(7397), 225–228, doi:10.1038/nature11064, 2012.
- 35 Hellmer, H. H., Kauker, F., Timmermann, R. and Hattermann, T.: The fate of the Southern Weddell sea continental shelf in a warming climate, *J. Clim.*, 30(12), 4337–4350, doi:10.1175/JCLI-D-16-0420.1, 2017.
- Hillenbrand, C. D., Smith, J. A., Hodell, D. A., Greaves, M., Poole, C. R., Kender, S., Williams, M., Andersen, T. J., Jemas, P. E., Elderfield, H., Klages, J. P., Roberts, S. J., Gohl, K., Larter, R. D. and Kuhn, G.: West Antarctic Ice Sheet retreat driven by Holocene warm water incursions, *Nature*, 547(7661), 43–48, doi:10.1038/nature22995, 2017.
- 40 Hoffman, M. J., Perego, M., Price, S. F., Lipscomb, W. H., Zhang, T., Jacobsen, D., Tezaur, I., Salinger, A. G., Tuminaro, R. and Bertagna, L.: MPAS-Albany Land Ice (MALI): A variable resolution ice sheet model for Earth system modeling using Voronoi grids, *Geosci. Model Dev.*, doi:10.5194/gmd-2018-78, 2018.
- Huybrechts, P.: A 3-D model for the Antarctic ice sheet: a sensitivity study on the glacial-interglacial contrast, *Clim. Dyn.*,

- 5(2), 79–92, doi:10.1007/BF00207423, 1990.
- Huybrechts, P.: Sea-level changes at the LGM from ice-dynamic reconstructions of the Greenland and Antarctic ice sheets during the glacial cycles, *Quat. Sci. Rev.*, 21(1–3), 203–231, doi:10.1016/S0277-3791(01)00082-8, 2002.
- Jenkins, A.: A One-Dimensional Model of Ice Shelf-Ocean Interaction, *J. Geophys. Res.*, 96(C11), 20671–20677, 1991.
- 5 Jenkins, A., Shoosmith, D., Dutrieux, P., Jacobs, S., Kim, T. W., Lee, S. H., Ha, H. K. and Stammerjohn, S.: West Antarctic Ice Sheet retreat in the Amundsen Sea driven by decadal oceanic variability, *Nat. Geosci.*, doi:10.1038/s41561-018-0207-4, 2018.
- Joughin, I., Smith, B. E. and Medley, B.: Marine ice sheet collapse potentially under way for the thwaites glacier basin, West Antarctica, *Science* (80-. ), 344(6185), 735–738, doi:10.1126/science.1249055, 2014.
- 10 Kleiner, T. and Humbert, A.: Numerical simulations of major ice streams in western Dronning Maud Land, Antarctica, under wet and dry basal conditions, *J. Glaciol.*, 60(220), 215–232, doi:10.3189/2014JoG13J006, 2014.
- Larour, E., Seroussi, H., Morlighem, M. and Rignot, E.: Continental scale, high order, high spatial resolution, ice sheet modeling using the Ice Sheet System Model (ISSM), *J. Geophys. Res.*, 117(F01022), 1–20, doi:10.1029/2011JF002140, 2012.
- 15 Lazeroms, W. M. J., Jenkins, A., Hilmar Gudmundsson, G. and Van De Wal, R. S. W.: Modelling present-day basal melt rates for Antarctic ice shelves using a parametrization of buoyant meltwater plumes, *Cryosphere*, doi:10.5194/tc-12-49-2018, 2018.
- Leguy, G. R., Asay-Davis, X. S. and Lipscomb, W. H.: Parameterization of basal friction near grounding lines in a one-dimensional ice sheet model, *Cryosph.*, 8(4), 1239–1259, 2014.
- 20 Lenaerts, J. T. M., van den Broeke, M. R., Van De Berg, W. J., Van Meijgaard, E. and Kuipers Munneke, P.: A new, high-resolution surface mass balance map of Antarctica (1979–2010) based on regional atmospheric climate modeling, *Geophys. Res. Lett.*, 39(4), 1–5, doi:10.1029/2011GL050713, 2012.
- Lenaerts, J. T. M., Vizcaino, M., Fyke, J., van Kampenhout, L. and van den Broeke, M. R.: Present-day and future Antarctic ice sheet climate and surface mass balance in the Community Earth System Model, *Clim. Dyn.*, 47(5–6), 1367–1381, doi:10.1007/s00382-015-2907-4, 2016.
- 25 Levermann, A., Albrecht, T., Winkelmann, R., Martin, M. A. A., Haseloff, M. and Joughin, I.: Kinematic first-order calving law implies potential for abrupt ice-shelf retreat, *Cryosph.*, 6(2), 273–286, doi:10.5194/tc-6-273-2012, 2012.
- Levermann, A., Clark, P. U. P. U., Marzeion, B., Milne, G. A. G. A. G. A. G. A., Pollard, D., Radic, V. and Robinson, A.: The multimillennial sea-level commitment of global warming., *Proc. Natl. Acad. Sci. U. S. A.*, 110(34), 13745–50, doi:10.1073/pnas.1219414110, 2013.
- 30 Levermann, A., Winkelmann, R., Nowicki, S., Fastook, J. L. L., Frieler, K., Greve, R., Hellmer, H. H. H., Martin, M. A. A., Meinshausen, M., Mengel, M., Payne, A. J. J., Pollard, D., Sato, T., Timmermann, R., Wang, W. L. L. and Bindshadler, R. A. A.: Projecting Antarctic ice discharge using response functions from SeaRISE ice-sheet models, *Earth Syst. Dyn.*, 5(2), 271–293, doi:10.5194/esd-5-271-2014, 2014.
- 35 Levitus, S., Antonov, J. I., Boyer, T. P., Baranova, O. K., Garcia, H. E., Locarnini, R. A., Mishonov, A. V., Reagan, J. R., Seidov, D., Yarosh, E. S. and Zweng, M. M.: World ocean heat content and thermosteric sea level change ( 0 – 2000 m ), 1955 – 2010, *Geophys. Res. Lett.*, 39, L10603, doi:10.1029/2012GL051106, 2012.
- Van Liefferinge, B. and Pattyn, F.: Using ice-flow models to evaluate potential sites of million year-old ice in Antarctica, *Clim. Past*, 9, 2335–2345, doi:10.5194/cp-9-2335-2013, 2013.
- 40 Lipscomb, W. H., Price, S. F., Hoffman, M. J., Leguy, G. R., Bennett, A. R., Bradley, S. L., Evans, K. J., Fyke, J. G., Kennedy, J. H., Perego, M., Ranken, D. M., Sacks, W. J., Salinger, A. G., Vargo, L. J. and Worley, P. H.: Description and Evaluation of the Community Ice Sheet Model (CISM) v2.1, *Geosci. Model Dev.*, 12, 387–424, doi:10.5194/gmd-12-387-2019, 2019.

- Little, C. M., Urban, N. M. and Oppenheimer, M.: Probabilistic framework for assessing the ice sheet contribution to sea level change., *Proc. Natl. Acad. Sci. U. S. A.*, 110(9), 3264–9, doi:10.1073/pnas.1214457110, 2013a.
- Little, C. M., Oppenheimer, M. and Urban, N. M.: Upper bounds on twenty-first-century Antarctic ice loss assessed using a probabilistic framework, *Nat. Clim. Chang.*, 3(March), 1–6, doi:10.1038/nclimate1845, 2013b.
- 5 Locarnini, R. A., Mishonov, A. V., Antonov, J. I., Boyer, T. P., Garcia, H. E., Baranova, O. K., Zweng, M. M. and Johnson, D. R.: *World Ocean Atlas 2013, Volume 1: Temperature.*, NOAA Atlas NESDIS 73, U.S. Gov. Print. Off., 40pp, 2013.
- MacAyeal, D.: Large-scale ice flow over a viscous basal sediment: Theory and application to ice stream B, Antarctica, *J. Geophys. Res.*, 94(B4), 4071–4087, 1989.
- Martin, D. F., Cornford, S. L. and Payne, A. J.: Millennial-scale Vulnerability of the Antarctic Ice Sheet to Regional Ice Shelf Collapse, *Geophys. Res. Lett.*, 46, 1467–1475, doi:10.1029/2018GL081229, 2019.
- 10 Martin, M. A. A., Winkelmann, R., Haseloff, M., Albrecht, T., Bueler, E., Khroulev, C. and Levermann, A.: The Potsdam Parallel Ice Sheet Model (PISM-PIK) - Part 2: Dynamic equilibrium simulation of the Antarctic ice sheet, *Cryosphere*, 5(3), 727–740, doi:10.5194/tc-5-727-2011, 2011.
- Martos, Y. M., Catalán, M., Jordan, T. A., Golynsky, A., Golynsky, D., Eagles, G. and Vaughan, D. G.: Heat flux distribution of Antarctica unveiled, *Geophys. Res. Lett.*, 44, 11417–11426, doi:10.1002/2017GL075609, 2017.
- 15 Masson-Delmotte, V., Zhai, P., Pörtner, H. O., Roberts, D., Skea, J., Shukla, P. R., Pirani, A., Moufouma-Okia, W., C. Péan, R. P., Connors, S., Matthews, J. B. R., Chen, Y., Zhou, X., Gomis, M. I., Lonnoy, E., Maycock, T., Tignor, M. and Waterfield, T.: *IPCC Special Report on the impacts of global warming of 1.5°C above pre-industrial levels and related global greenhouse gas emission pathways, in the context of strengthening the global response to the threat of climate change, sustainable development, an*, Cambridge University Press. [online] Available from: <https://www.ipcc.ch/sr15>, 2018.
- 20 Medley, B. and Thomas, E. R.: Increased snowfall over the Antarctic Ice Sheet mitigated twentieth-century sea-level rise, *Nat. Clim. Chang.*, doi:10.1038/s41558-018-0356-x, 2019.
- Meinshausen, M., Meinshausen, N., Hare, W., Raper, S. C. B., Frieler, K., Knutti, R., Frame, D. J. and Allen, M. R.: Greenhouse-gas emission targets for limiting global warming to 2 degrees C., *Nature*, 458(7242), 1158–1162, doi:10.1038/nature08017, 2009.
- 25 Meinshausen, M., Smith, S. J., Calvin, K., Daniel, J. S., Kainuma, M. L. T., Lamarque, J., Matsumoto, K., Montzka, S. A., Raper, S. C. B., Riahi, K., Thomson, A., Velders, G. J. M. and van Vuuren, D. P. P.: The RCP greenhouse gas concentrations and their extensions from 1765 to 2300, *Clim. Change*, 109(1), 213–241, doi:10.1007/s10584-011-0156-z, 2011.
- 30 Morlighem, M., Rignot, E., Seroussi, H., Larour, E., Ben Dhia, H. and Aubry, D.: Spatial patterns of basal drag inferred using control methods from a full-Stokes and simpler models for Pine Island Glacier, West Antarctica, *Geophys. Res. Lett.*, 37(14), 1–6, doi:10.1029/2010GL043853, 2010.
- Morlighem, M., Seroussi, H., Larour, E. and Rignot, E.: Inversion of basal friction in Antarctica using exact and incomplete adjoints of a higher-order model, *J. Geophys. Res.*, 118(3), 1746–1753, doi:10.1002/jgrf.20125, 2013.
- 35 Moss, R. H. R. H., Edmonds, J. A. J. A., Hibbard, K. A. K. A., Manning, M. R., Rose, S. K. S. K., Van Vuuren, D. P. D. P., Carter, T. R. T. R., Emori, S., Kainuma, M., Kram, T., Meehl, G. A. G. A., Mitchell, J. F. B. J. F. B., Nakicenovic, N., Riahi, K., Smith, S. J. S. J., Stouffer, R. J. R. J., Thomson, A. M. A. M., Weyant, J. P. J. P. and Wilbanks, T. J. T. J.: The next generation of scenarios for climate change research and assessment, *Nature*, 463(7282), 747–756, doi:10.1038/nature08823, 2010.
- 40 Naish, T. R., Powell, R. D., Levy, R., Wilson, G. S., Scherer, R. P., Talarico, F., Krissek, L. A., Niessen, F., Pompilio, M., Wilson, T., Carter, L., DeConto, R. M., Huybers, P., McKay, R. M., Pollard, D., Ross, J., Winter, D., Barrett, P., Browne, G., Cody, R., Cowan, E. A., Crampton, J., Dunbar, G., Dunbar, N., Florindo, F., Gebhardt, C., Graham, I., Hannah, M., Hansaraj, D., Harwood, D. M., Helling, D., Henrys, S., Hinnov, L. A., Kuhn, G., Kyle, P., Läufer, A., Maffioli, P., Magens,

- D., Mandernack, K., McIntosh, W., Millan, C., Morin, R., Ohneiser, C., Paulsen, T., Persico, D., Raine, I., Reed, J., Riesselman, C. R., Sagnotti, L., Schmitt, D., Sjunneskog, C., Strong, P., Taviani, M., Vogel, S., Wilch, T., Williams, T., Barrett, A. P., Browne, G., Cody, R., Cowan, E. A., Crampton, J., Dunbar, G., Dunbar, N., Florindo, F., Gebhardt, C., Graham, I., Hannah, M., Hansaraj, D., Harwood, D. M., Helling, D., Henrys, S., Hinnov, L. A., Kuhn, G., Kyle, P., Läufer, A., Maffioli, P., Magens, D., Mandernack, K., McIntosh, W., Millan, C., Morin, R., Ohneiser, C., Paulsen, T., Persico, D., Raine, I., Reed, J., Riesselman, C. R., Sagnotti, L., Schmitt, D., Sjunneskog, C., Strong, P., Taviani, M., Vogel, S., Wilch, T. and Williams, T.: Obliquity-paced Pliocene West Antarctic ice sheet oscillations, *Nature*, 458(7236), 322–328, doi:10.1038/nature07867, 2009.
- Nations, U.: Paris Climate Agreement, Paris. [online] Available from: [https://unfccc.int/sites/default/files/english\\_paris\\_agreement.pdf](https://unfccc.int/sites/default/files/english_paris_agreement.pdf), 2015.
- Nowicki, S., Bindenschadler, R. A., Abe-Ouchi, A., Aschwanden, A., Bueler, E., Choi, H., Fastook, J., Granzow, G., Greve, R., Gutowski, G., Herzfeld, U., Jackson, C., Johnson, J., Khroulev, C., Larour, E., Levermann, A., Lipscomb, W. H., Martin, M. A., Morlighem, M., Parizek, B. R., Pollard, D., Price, S. F., Ren, D., Rignot, E., Saito, F., Sato, T., Seddik, H., Seroussi, H., Takahashi, K., Walker, R. and Wang, W. L.: Insights into spatial sensitivities of ice mass response to environmental change from the SeaRISE ice sheet modeling project II: Greenland, *J. Geophys. Res. Earth Surf.*, 118(2), 1025–1044, doi:10.1002/jgrf.20076, 2013.
- Nowicki, S. M. J. J., Payne, A., Larour, E., Seroussi, H., Goelzer, H., Lipscomb, W., Gregory, J., Abe-Ouchi, A., Shepherd, A., Payne, T., Larour, E., Seroussi, H., Goelzer, H., Lipscomb, W., Gregory, J., Abe-Ouchi, A. and Shepherd, A.: Ice Sheet Model Intercomparison Project (ISMIP6) contribution to CMIP6, *Geosci. Model Dev.*, 9(12), 4521–4545, doi:10.5194/gmd-2016-105, 2016.
- O’Gorman, P. A., Allan, R. P., Byrne, M. P. and Previdi, M.: Energetic Constraints on Precipitation Under Climate Change, *Surv. Geophys.*, 33(3–4), 585–608, doi:10.1007/s10712-011-9159-6, 2012.
- Olbers, D. and Hellmer, H.: A box model of circulation and melting in ice shelf caverns, *Ocean Dyn.*, 60(1), 141–153, doi:10.1007/s10236-009-0252-z, 2010.
- Oppenheimer, M., Glavovic, B. and et al.: Chapter 4: Sea Level Rise and Implications for Low Lying Islands, Coasts and Communities, in IPCC SR Ocean and Cryosphere., 2019.
- Palermo, C., Kay, J. E., Genthon, C., L’Ecuyer, T., Wood, N. B. and Claud, C.: How much snow falls on the Antarctic ice sheet?, *Cryosphere*, 8(4), 1577–1587, doi:10.5194/tc-8-1577-2014, 2014.
- Palermo, C., Genthon, C., Claud, C., Kay, J. E., Wood, N. B. and L’Ecuyer, T.: Evaluation of current and projected Antarctic precipitation in CMIP5 models, *Clim. Dyn.*, 48(1–2), 225–239, doi:10.1007/s00382-016-3071-1, 2017.
- Paolo, F. S., Fricker, H. A. and Padman, L.: Volume loss from Antarctic ice shelves is accelerating, *Science* (80-. ), 348(6232), 327–332, doi:10.1126/science.aaa0940, 2015.
- Pattyn, F.: A new three-dimensional higher-order thermomechanical ice sheet model: Basic sensitivity, ice stream development, and ice flow across subglacial lakes, *J. Geophys. Res.*, 108(B8), 1–15, doi:10.1029/2002JB002329, 2003.
- Pattyn, F.: Sea-level response to melting of Antarctic ice shelves on multi-centennial timescales with the fast Elementary Thermomechanical Ice Sheet model (f.ETISH v1.0), *Cryosph.*, 11, 1851–1878, doi:10.5194/tc-11-1851-2017, 2017.
- Pattyn, F. and Durand, G.: Why marine ice sheet model predictions may diverge in estimating future sea level rise, *Geophys. Res. Lett.*, 40(16), 4316–4320, doi:10.1002/grl.50824, 2013.
- Pattyn, F., Schoof, C., Perichon, L., Hindmarsh, R. C. A., Bueler, E., De Fleurian, B., Durand, G., Gagliardini, O., Gladstone, R., Goldberg, D., Gudmundsson, G. H., Huybrechts, P., Lee, V., Nick, F. M., Payne, A. J., Pollard, D., Rybak, O., Saito, F. and Vieli, A.: Results of the marine ice sheet model intercomparison project, MISMIP, *Cryosphere*, 6(3), 573–588, doi:10.5194/tc-6-573-2012, 2012.
- Payne, A. J., Holland, P. R., Shepherd, A. P., Rutt, I. C., Jenkins, A. and Joughin, I.: Numerical modeling of ocean-ice

- interactions under Pine Island Bay's ice shelf, *J. Geophys. Res. Ocean.*, 112(10), 1–14, doi:10.1029/2006JC003733, 2007.
- Perego, M., Price, S. and Stadler, G.: Optimal initial conditions for coupling ice sheet models to Earth system models, *J. Geophys. Res. Earth Surf.*, 119, 1–24, doi:10.1002/2014JF003181. Received, 2014.
- Petit, R. J., Raynaud, D., Basile, I., Chappellaz, J., Ritz, C., Delmotte, M., Legrand, M., Lorius, C., Pe, L., Petit, J. R., Jouzel, J., Raynaud, D., Barkov, N. I., Barnola, J. M., Basile, I., Bender, M., Chappellaz, J., Davis, M., Delaygue, G., Delmotte, M., Kotlyakov, V. M., Legrand, M., Lipenkov, V. Y., Lorius, C., Pepin, L., Ritz, C., Saltzman, E. and Stievenard, M.: Climate and atmospheric history of the past 420,000 years from the Vostok ice core, Antarctica, *Nature*, 399(6735), 429–413, doi:10.1038/20859, 1999.
- Pollard, D. and DeConto, R.: Modelling West Antarctic ice sheet growth and collapse through the past five million years, *Nature*, 458(7236), 329–332, doi:10.1038/nature07809, 2009.
- Pollard, D. and DeConto, R. M.: A simple inverse method for the distribution of basal sliding coefficients under ice sheets, applied to Antarctica, *Cryosph.*, 6(5), 953–971, doi:10.5194/tc-6-953-2012, 2012a.
- Pollard, D. and DeConto, R. M.: Description of a hybrid ice sheet-shelf model, and application to Antarctica, *Geosci. Model Dev.*, 5(5), 1273–1295, doi:10.5194/gmd-5-1273-2012, 2012b.
- Pollard, D., DeConto, R. M. and Alley, R. B.: Potential Antarctic Ice Sheet retreat driven by hydrofracturing and ice cliff failure, *Earth Planet. Sci. Lett.*, 412, 112–121, doi:10.1016/j.epsl.2014.12.035, 2015.
- Pörtner, H.-O., Roberts, D. C., Masson-Delmotte, V., Zhai, P., Tignor, M., Poloczanska, E., Mintenbeck, K., Nicolai, M., Okem, A., Petzold, J., Rama, B. and (eds.), N. W.: IPCC Special Report on the Ocean and Cryosphere in a Changing Climate (SROCC), Cambridge University Press. [online] Available from: <https://www.ipcc.ch/srocc/cite-report/>, 2019.
- Previdi, M. and Polvani, L. M.: Anthropogenic impact on Antarctic surface mass balance, currently masked by natural variability, to emerge by mid-century, *Environ. Res. Lett.*, 11(9), 094001, doi:10.1088/1748-9326/11/9/094001, 2016.
- Pritchard, H. D. D., Ligtenberg, S. R., Fricker, H. a. A., Vaughan, D. G. G., Van Den Broeke, M. R. and Padman, L.: Antarctic ice-sheet loss driven by basal melting of ice shelves, *Nature*, 484(7395), 502–505, doi:10.1038/nature10968, 2012.
- Quiquet, A., Dumas, C., Ritz, C., Peyaud, V. and Roche, D. M.: The GRISLI ice sheet model (version 2.0): calibration and validation for multi-millennial changes of the Antarctic ice sheet, *Geosci. Model Dev. Discuss.*, 1–35, doi:<https://doi.org/10.5194/gmd-2018-105>, 2018.
- Reese, A. R., Gudmundsson, G. H. H., Levermann, A., Winkelmann, R., Reese, R., Gudmundsson, G. H. H., Levermann, A., Winkelmann, R., Reese, A. R., Gudmundsson, G. H. H., Levermann, A., Winkelmann, R., Reese, R., Gudmundsson, G. H. H., Levermann, A. and Winkelmann, R.: The far reach of ice-shelf thinning in Antarctica, *Nat. Clim. Chang.*, 8(1), 53–57, doi:10.1038/s41558-017-0020-x, 2018a.
- Reese, R., Albrecht, T., Mengel, M., Asay-Davis, X. and Winkelmann, R.: Antarctic sub-shelf melt rates via PICO, *Cryosph.*, 12(6), 1969–1985, doi:10.5194/tc-12-1969-2018, 2018b.
- Rignot, E., Mouginot, J. and Scheuchl, B.: Ice flow of the antarctic ice sheet, *Science (80-. )*, 333(6048), 1427–1430, doi:10.1126/science.1208336, 2011.
- Rignot, E., Jacobs, S., Mouginot, J. and Scheuchl, B.: Ice-shelf melting around Antarctica., *Science (80-. )*, 341(July), 266–270, doi:10.1126/science.1235798, 2013.
- Rignot, E., Mouginot, J., Morlighem, M., Seroussi, H. and Scheuchl, B.: Widespread, rapid grounding line retreat of Pine Island, Thwaites, Smith, and Kohler glaciers, West Antarctica, from 1992 to 2011, *Geophys. Res. Lett.*, 41(10), 3502–3509, doi:10.1002/2014GL060140, 2014.
- Rignot, E., Mouginot, J., Scheuchl, B., van den Broeke, M. R., van Wessem, M. J. and Morlighem, M.: Four decades of Antarctic Ice Sheet mass balance from 1979–2017, *Proc. Natl. Acad. Sci.*, 116(4), 1–9, doi:10.1073/pnas.1812883116, 2019.
- Ritz, C.: Un modèle thermo-mécanique d'évolution pour le bassin glaciaire antarctique Vostok-Glacier Byrd: Sensibilité aux valeurs des paramètres mal connus, Université Joseph-Fourier - Grenoble I., 1992.

- Ritz, C., Fabre, A. and Letréguilly, A.: Sensitivity of a Greenland ice sheet model to ice flow and ablation parameters: consequences for the evolution through the last climatic cycle, *Clim. Dyn.*, 13(1), 11–23, doi:10.1007/s003820050149, 1997.
- Ritz, C., Rommelaere, V. and Dumas, C.: Modeling the evolution of Antarctic ice sheet over the last 420,000 years: Implications for altitude changes in the Vostok region, *J. Geophys. Res.*, 106, 31943–31964, doi:10.1029/2001JD900232, 5 2001.
- Rommelaere, V. and Ritz, C.: A thermomechanical model of ice-shelf flow, *Ann. Glaciol.*, 23, 13–20, 1996.
- Ruckert, K. L., Shaffer, G., Pollard, D., Guan, Y., Wong, T. E., Forest, C. E. and Keller, K.: Assessing the Impact of Retreat Mechanisms in a Simple Antarctic Ice Sheet Model Using Bayesian Calibration, edited by J. A. Añel, *PLoS One*, 12(1), e0170052, doi:10.1371/journal.pone.0170052, 2017.
- 10 Sato, T. and Greve, R.: Sensitivity experiments for the Antarctic ice sheet with varied sub-ice-shelf melting rates, *Ann. Glaciol.*, 53(60), 221–228, doi:10.3189/2012AoG60A042, 2012.
- Schlegel, N.-J., Seroussi, H., Schodlok, M. P., Larour, E. Y., Boening, C., Limonadi, D., Watkins, M. M., Morlighem, M. and van den Broeke, M. R.: Exploration of Antarctic Ice Sheet 100-year contribution to sea level rise and associated model uncertainties using the ISSM framework, *Cryosph. Discuss.*, 2018.
- 15 Schleussner, C.-F. F. C.-F. C.-F., Rogelj, J., Schaeffer, M., Lissner, T., Licker, R., Fischer, E. M. E. M., Knutti, R., Levermann, A., Frieler, K. and Hare, W.: Science and policy characteristics of the Paris Agreement temperature goal, *Nat. Clim. Chang.*, 6(9), 827–835, doi:10.1038/nclimate3096, 2016.
- Schmidtko, S., Heywood, K. J., Thompson, A. F. and Aoki, S.: Multidecadal warming of Antarctic waters, *Science (80-. )*, 346(6214), 1227–1231, doi:10.1126/science.1256117, 2014.
- 20 Schodlok, M. P., Menemenlis, D. and Rignot, E. J.: Ice shelf basal melt rates around Antarctica from simulations and observations, *J. Geophys. Res.*, 121, 1085–1109, doi:10.1002/2015JC011117, 2016.
- Schoof, C.: The effect of cavitation on glacier sliding, in *Proceedings of the Royal Society of London A: Mathematical, Physical and Engineering Sciences*, vol. 461, pp. 609–627., 2005.
- Schoof, C.: A variational approach to ice stream flow, *J. Fluid Mech.*, 556, 227–251, doi:10.1017/S0022112006009591, 25 2006.
- Schoof, C.: Ice sheet grounding line dynamics: Steady states, stability, and hysteresis, *J. Geophys. Res. Earth Surf.*, 112(3), 1–19, doi:10.1029/2006JF000664, 2007.
- Schoof, C. and Hindmarsh, R. C. A.: Thin-film flows with wall slip: an asymptotic analysis of higher order glacier flow models, *Q. J. Mech. Appl. Math.*, 63, 73–114, doi:10.1093/qjmam/hbp025, 2010.
- 30 Seroussi, H. and Morlighem, M.: Representation of basal melting at the grounding line in ice flow models, *Cryosph.*, 12, 3085–3096, doi:10.5194/tc-12-3085-2018, 2019.
- Seroussi, H., Morlighem, M., Rignot, E., Larour, E., Aubry, D., Ben Dhia, H., Kristensen, S. S., Dhia, H. Ben and Kristensen, S. S.: Ice flux divergence anomalies on 79north Glacier, Greenland, *Geophys. Res. Lett.*, 38(9), 1–5, doi:10.1029/2011GL047338, 2011.
- 35 Seroussi, H., Morlighem, M., Larour, E., Rignot, E. and Khazendar, A.: Hydrostatic grounding line parameterization in ice sheet models, *Cryosphere*, 8(6), 2075–2087, doi:10.5194/tc-8-2075-2014, 2014.
- Seroussi, H., Nowicki, S., Simon, E., Abe-Ouchi, A., Albrecht, T., Brondex, J., Cornford, S., Dumas, C., Gillet-Chaulet, F., Goelzer, H., Gолledge, N. R., Gregory, J. M., Greve, R., Hoffman, M. J., Humbert, A., Huybrechts, P., Kleiner, T., Larour, E., Leguy, G., Lipscomb, W. H., Lowry, D., Mengel, M., Morlighem, M., Pattyn, F., Payne, A. J., Pollard, D., Price, S. F., 40 Quiquet, A., Reerink, T. J., Reese, R., Rodehacke, C. B., Schlegel, N.-J. N.-J., Shepherd, A., Sun, S., Sutter, J., Van Breedam, J., van de Wal, R. S. W., Winkelmann, R., Zhang, T., Abe Ouchi, A., Albrecht, T., Brondex, J., Cornford, S., Dumas, C., Gillet-Chaulet, F., Goelzer, H., Gолledge, N. R., Gregory, J. M., Greve, R., Hoffman, M. J., Humbert, A., Huybrechts, P., Kleiner, T., Larour, E., Leguy, G., Lipscomb, W. H., Lowry, D., Mengel, M., Morlighem, M., Pattyn, F.,

- Payne, A. J., Pollard, D., Price, S. F., Quiquet, A., Reerink, T. J., Reese, R., Rodehacke, C. B., Schlegel, N.-J. N.-J., Shepherd, A., Sun, S., Sutter, J., Van Breedam, J., van de Wal, R. S. W., Winkelmann, R. and Zhang, T.: initMIP-Antarctica: an ice sheet model initialization experiment of ISMIP6, *Cryosph.*, 13(5), 1441–1471, doi:10.5194/tc-13-1441-2019, 2019.
- Shapiro, N. M. and Ritzwoller, M. H.: Inferring surface heat flux distributions guided by a global seismic model: particular application to Antarctica, *Earth Planet. Sci. Lett.*, 223, 213–224, doi:10.1016/j.epsl.2004.04.011, 2004.
- 5 Shepherd, A., Wingham, D. and Rignot, E.: Warm ocean is eroding West Antarctic Ice Sheet, *Geophys. Res. Lett.*, 31(23), 1–4, doi:10.1029/2004GL021106, 2004.
- Shepherd, A., Ivins, E. R., Geruo, A., Barletta, V. R., Bentley, M. J., Bettadpur, S., Briggs, K. H., Bromwich, D. H., Forsberg, R., Galin, N., Horwath, M., Jacobs, S., Joughin, I., King, M. A., Lenaerts, J. T. M. M., Li, J., Ligtenberg, S. R. M. M., Luckman, A., Luthcke, S. B., McMillan, M., Meister, R., Milne, G., Mouginot, J., Muir, A., Nicolas, J. P., Paden, J., Payne, A. J., Pritchard, H., Rignot, E., Rott, H., Sørensen, L. S., Scambos, T. A., Scheuchl, B., Schrama, E. J. O. O., Smith, B., Sundal, A. V., Van Angelen, J. H., Van De Berg, W. J., Van Den Broeke, M. R., Vaughan, D. G., Velicogna, I., Wahr, J., Whitehouse, P. L., Wingham, D. J., Yi, D., Young, D., Zwally, H. J., Sorensen, L. S., Scambos, T. A., Scheuchl, B., Schrama, E. J. O. O., Smith, B., Sundal, A. V., Van Angelen, J. H., Van De Berg, W. J., Van Den Broeke, M. R., Vaughan, D. G., Velicogna, I., Wahr, J., Whitehouse, P. L., Wingham, D. J., Yi, D., Young, D., Zwally, H. J., A. G., Barletta, V. R., Bentley, M. J., Bettadpur, S., Briggs, K. H., Bromwich, D. H., Forsberg, R., Galin, N., Horwath, M., Jacobs, S., Joughin, I., King, M. A., Lenaerts, J. T. M. M., Li, J., Ligtenberg, S. R. M. M., Luckman, A., Luthcke, S. B., McMillan, M., Meister, R., Milne, G., Mouginot, J., Muir, A., Nicolas, J. P., Paden, J., Payne, A. J., Pritchard, H., Rignot, E., Rott, H., Sorensen, L. S., Scambos, T. A., Scheuchl, B., Schrama, E. J. O. O., Smith, B., Sundal, A. V., Van Angelen, J. H., et al.: A reconciled estimate of ice-sheet mass balance, *Science* (80-. ), 338(6111), 1183–1189, doi:10.1126/science.1228102, 2012.
- 10 Shepherd, A., Ivins, E., Rignot, E., Smith, B., Broeke, M. van den, Velicogna, I., Whitehouse, P., Briggs, K., Joughin, I., Krinner, G., Nowicki, S., Payne, T., Scambos, T., Schlegel, N., A. G., Agosta, C., Ahlstrøm, A., Babonis, G., Barletta, V., Blazquez, A., Bonin, J., Csatho, B., Cullather, R., Felikson, D., Fettweis, X., Forsberg, R., Gallee, H., Gardner, A., Gilbert, L., Groh, A., Gunter, B., Hanna, E., Harig, C., Helm, V., Horwath, A., Horwath, M., Khan, S., Kjeldsen, K. K., Konrad, H., Langen, P., Lecavalier, B., Loomis, B., Luthcke, S., McMillan, M., Melini, D., Mernild, S. and Mohajerani, Y.: Mass balance of the Antarctic Ice Sheet from 1992 to 2017, *Nature*, 558(7709), 219–222, doi:10.1038/s41586-018-0179-y, 2018.
- 25 Slangen, A. B. A. A., Adloff, F., Jevrejeva, S., Leclercq, P. W., Marzeion, B., Wada, Y. and Winkelmann, R.: A Review of Recent Updates of Sea-Level Projections at Global and Regional Scales, *Surv. Geophys.*, 38(1), 385–406, doi:10.1007/s10712-016-9374-2, 2016.
- 30 Stocker, T. F., Qin, D., Plattner, G. K., Tignor, M., Allen, S. K., Boschung, J., Nauels, A., Xia, Y., Bex, B. and Midgley, B. M.: IPCC, 2013: climate change 2013: the physical science basis. Contribution of working group I to the fifth assessment report of the intergovernmental panel on climate change, Cambridge University Press., 2013.
- Swingedouw, D., Fichefet, T., Huybrechts, P., Goosse, H., Driesschaert, E. and Loutre, M. F.: Antarctic ice-sheet melting provides negative feedbacks on future climate warming, *Geophys. Res. Lett.*, 35(17), doi:10.1029/2008GL034410, 2008.
- 35 Taylor, K. E., Stouffer, R. J. and Meehl, G. A.: An overview of CMIP5 and the experiment design, *Bull. Am. Meteorol. Soc.*, 93(4), 485–498, doi:10.1175/BAMS-D-11-00094.1, 2012.
- Tsai, V. C., Stewart, A. L. and Thompson, A. F.: Marine ice-sheet profiles and stability under {C}oulomb basal conditions, *J. Glaciol.*, 61(226), 205–215, doi:10.3189/2015JoG14J221, 2015.
- Weertman, J.: On the Sliding of Glaciers, *J. Glaciol.*, 3(21), 33–38, doi:10.3189/S0022143000024709, 1957.
- 40 Weertman, J.: Stability of the junction of an ice sheet and an ice shelf, *J. Glaciol.*, 13(67), 3–11, doi:10.3198/1974JoG13-67-3-11, 1974.
- van Wessem, J. M., Jan Van De Berg, W., Noël, B. P. Y., Van Meijgaard, E., Amory, C., Birnbaum, G., Jakobs, C. L., Krüger, K., Lenaerts, J., Lhermitte, S. and others: Modelling the climate and surface mass balance of polar ice sheets using



RACMO2: Part 2: Antarctica (1979-2016), *Cryosphere*, 12(4), 1479–1498, 2018.

Van Wessem, J. M., Reijmer, C. H., Morlighem, M., Mougnot, J., Rignot, E., Medley, B., Joughin, I., Wouters, B., Depoorter, M. A., Bamber, J. L., Lenaerts, J. T. M., De Van Berg, W. J., Van Den Broeke, M. R. and Van Meijgaard, E.: Improved representation of East Antarctic surface mass balance in a regional atmospheric climate model, *J. Glaciol.*, 60(222), 761–770, doi:doi:10.3189/2014JoG14J051, 2014.

Winkelmann, R. and Levermann, A.: Linear response functions to project contributions to future sea level, *Clim. Dyn.*, 40(11–12), 2579–2588, doi:10.1007/s00382-012-1471-4, 2013.

Winkelmann, R., Martin, M. A. A., Haseloff, M., Albrecht, T., Bueler, E., Khroulev, C. and Levermann, A.: The Potsdam Parallel Ice Sheet Model (PISM-PIK) -- Part 1: Model description, *Cryosphere*, 5(3), 715–726, doi:10.5194/tc-5-715-2011, 2011.

Winkelmann, R., Levermann, A., Martin, M. A. A. and Frieler, K.: Increased future ice discharge from Antarctica owing to higher snowfall., *Nature*, 492(7428), 239–242, doi:10.1038/nature11616, 2012.

Wouters, B., Martin-Espanol, A., Helm, V., Flament, T., van Wessem, J. M., Ligtenberg, S. R. M. M., Van Den Broeke, M. R., Bamber, J. L., Martin-Español, A., Helm, V., Flament, T., van Wessem, J. M., Ligtenberg, S. R. M. M., Van Den Broeke, M. R. and Bamber, J. L.: Dynamic thinning of glaciers on the Southern Antarctic Peninsula, *Science* (80-. ), 348(6237), 899–903, doi:10.1126/science.aaa5727, 2015.

Figures

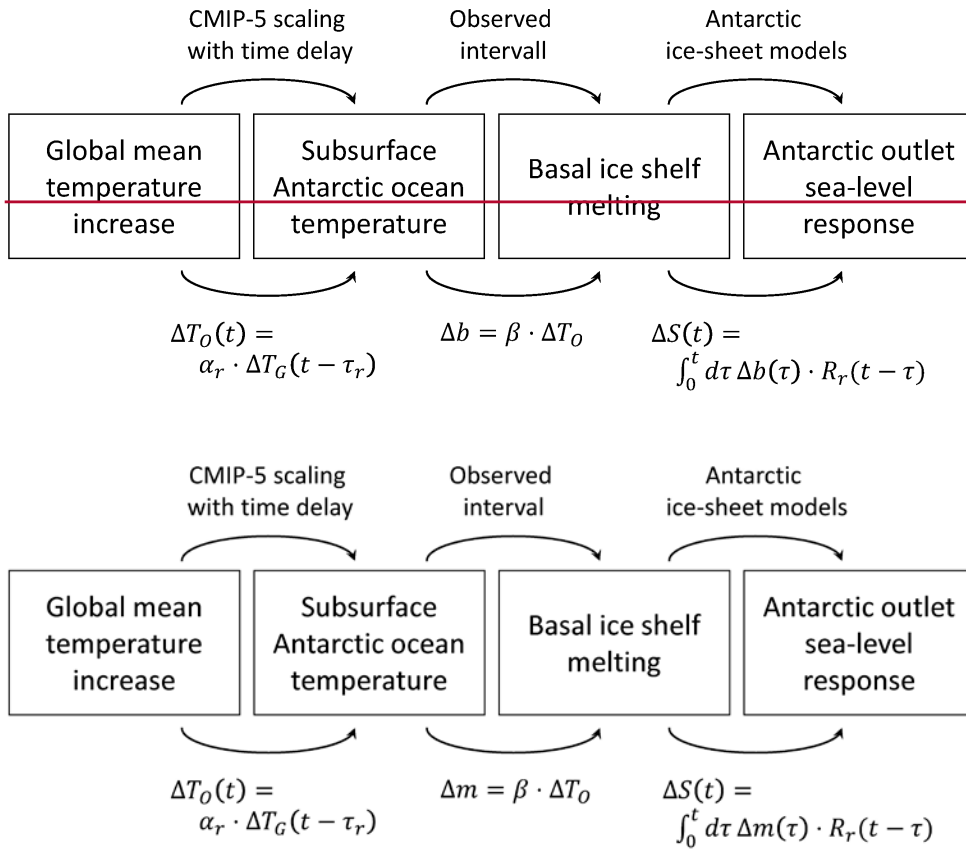

5

Formatted: Caption, Line spacing: 1,5 lines

**Figure 1: Schematic of projection procedure:** Global mean temperature increase,  $\Delta T_G$ , is transformed into a subsurface warming around Antarctica,  $\Delta T_O$ , with a scaling coefficient,  $\alpha_r$ , and a time delay,  $\tau_r$ , both of which are derived for each of the five Antarctic outlet region from 19 CMIP-5 models. The basal ice shelf melting rate,  $\Delta m$ , is then derived by multiplying the subsurface oceanic temperature with a basal melt sensitivity  $\beta$ . This sensitivity is randomly chosen from the observed interval. The basal melt rate is then convoluted with the ice-sheet response function of the specific region,  $R_r$ , to obtain the time series of this Antarctic outlet region.

10

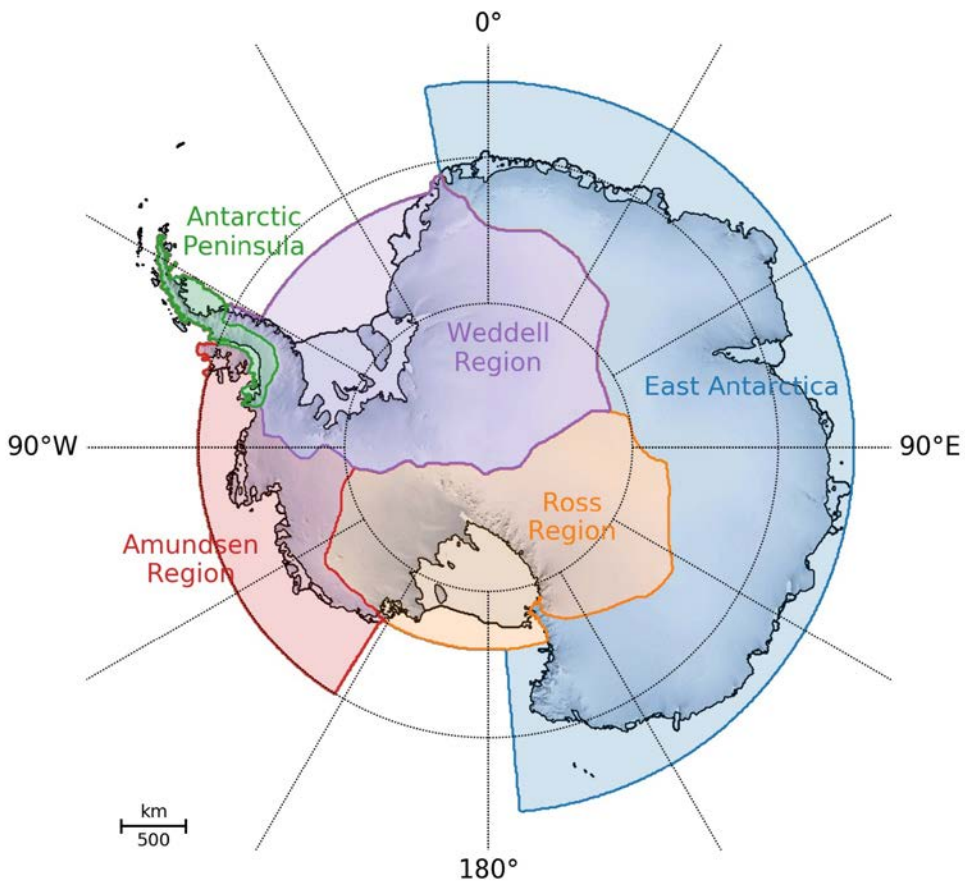

Figure 2: Oceanic regions in which the basal ice shelf melting was applied

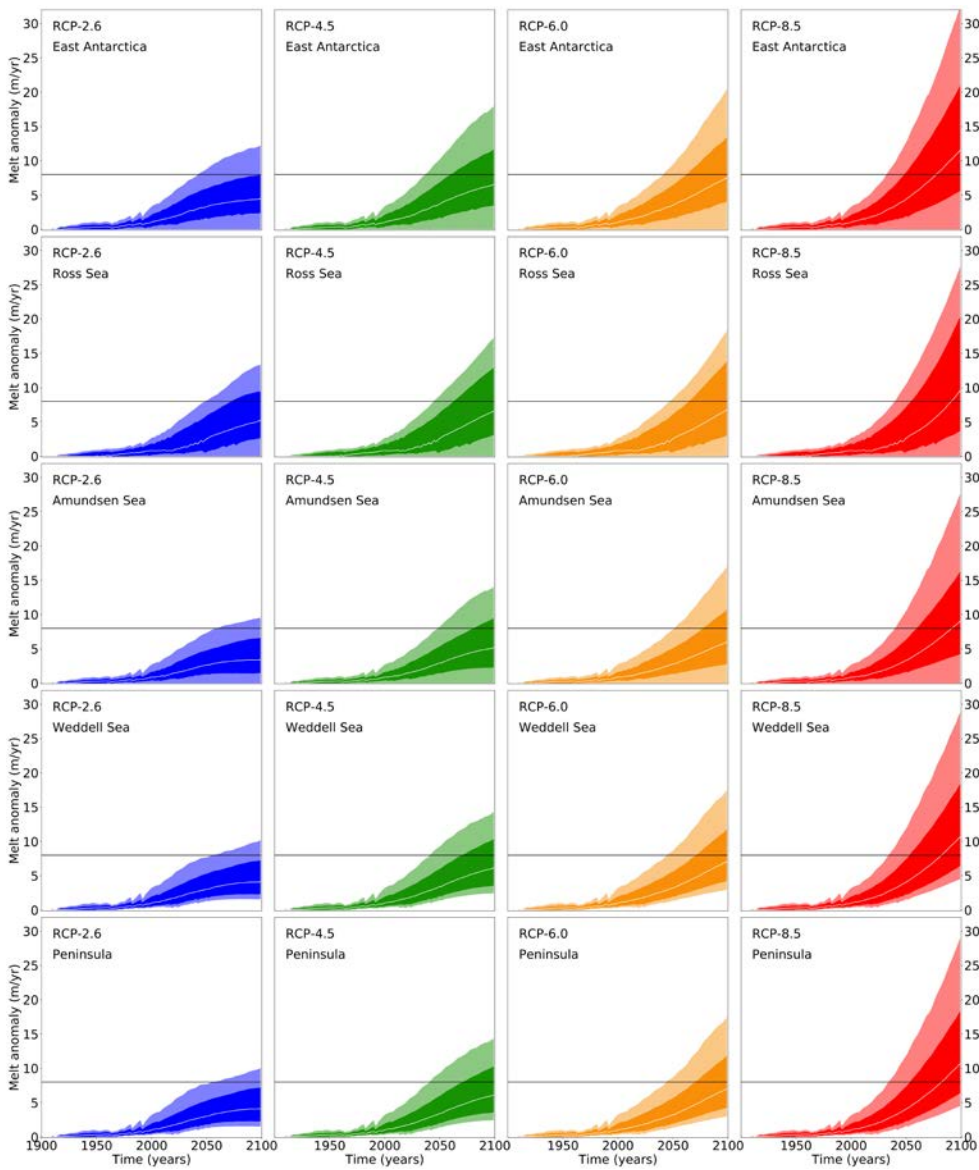

**Figure 3: Projected basal melt rates** following section 2. The experiment used here for all the ice sheet models is the one with an additional 8 m/yr of basal melting (black horizontal line in each panel). It is the experiment that is closest to the projected basal melt rates which fosters the applicability of the linear response theory.

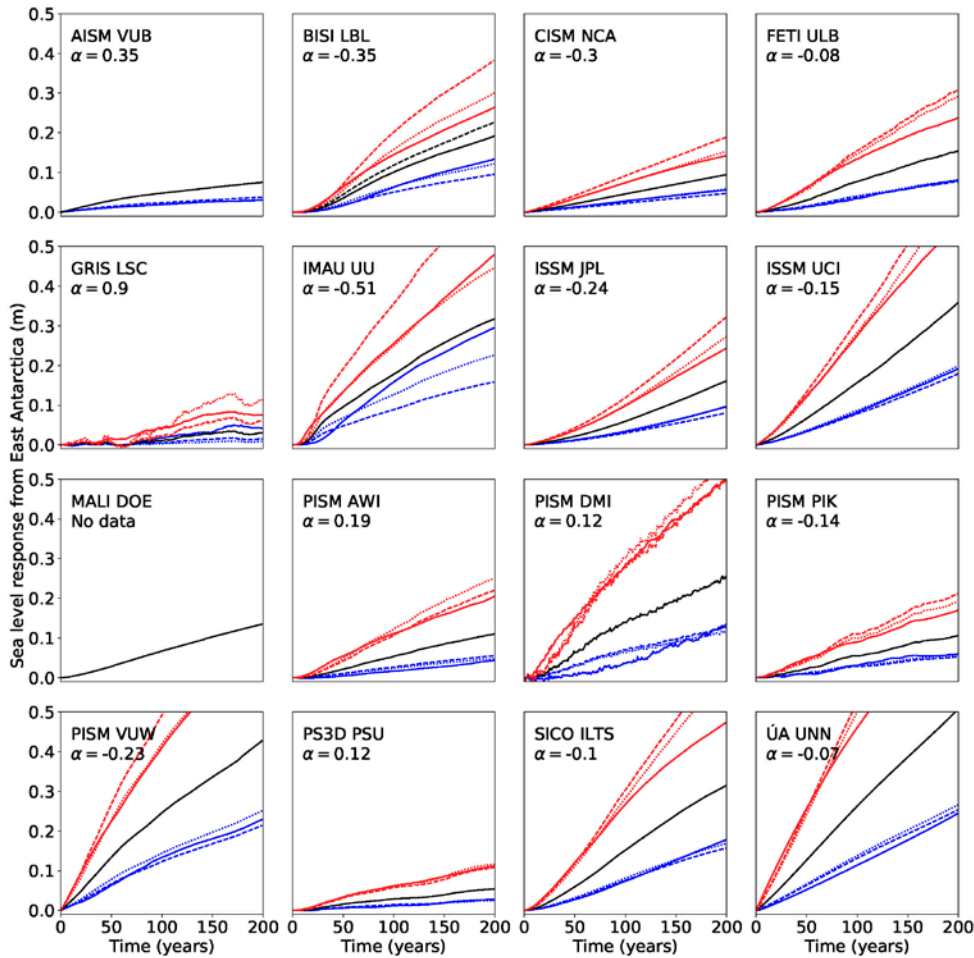

**Figure 4a: Linearity check for East Antarctica** Response of ice sheet models to additional basal melting of 8 m/yr (solid black line) underneath all ice shelves in East Antarctica compared to 4 m/yr (solid blue line) and 16 m/yr (solid red line). In order to check the linearity of the response to the warming amplitude the dashed red line gives the times series of the response to 8 m/yr of basal melt multiplied by 2 and the dashed blue line the same but divided by 2. The dotted lines give the scaled response with the scaling exponent  $\alpha$  (see equations (35) and (64)). A positive scaling exponent means that the ice sheet model responds super-linearly to basal ice shelf melting in this region. A negative  $\alpha$  indicates a sub-linear response in this region. AISM-VUB did not provide a 16 m/yr simulation. The black dashed line for BISI-LBL represents the simulation with 500m horizontal resolution that is used for the projections. The linearity is tested with a set of simulations at 1km horizontal resolution.

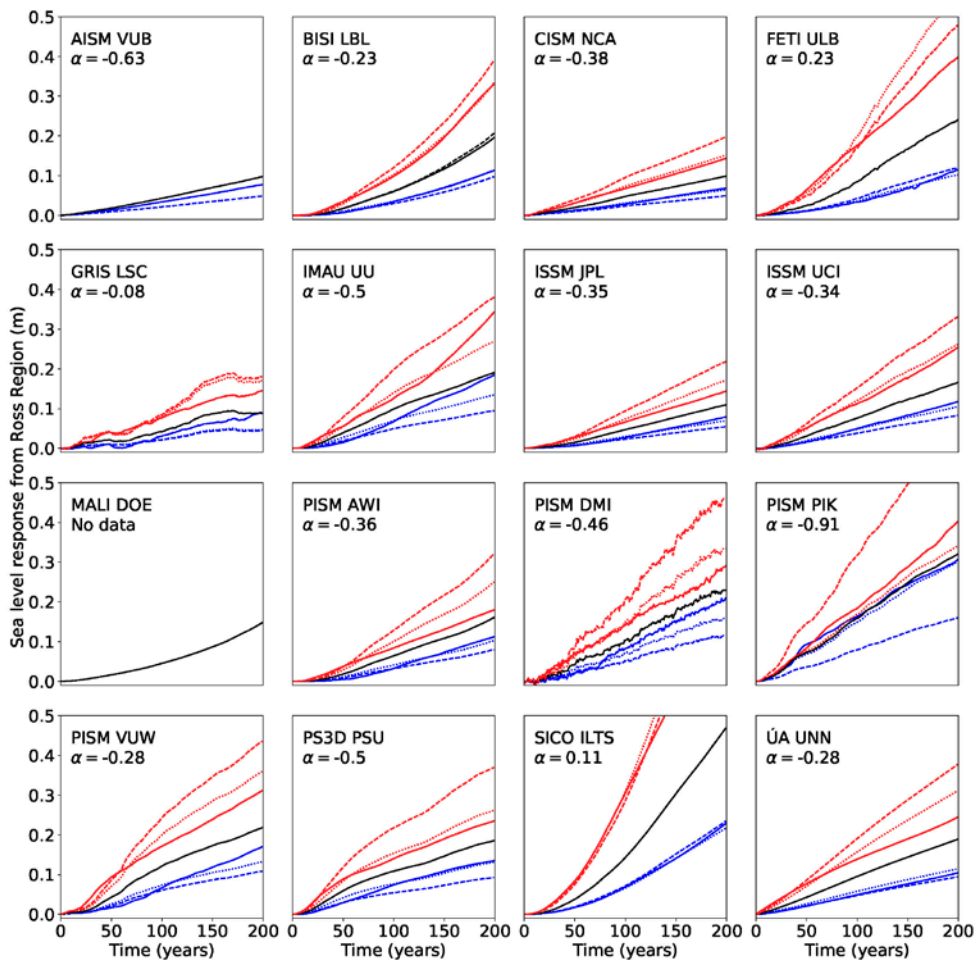

Figure 4b: Linearity check for the Ross region as in Figure 43a.

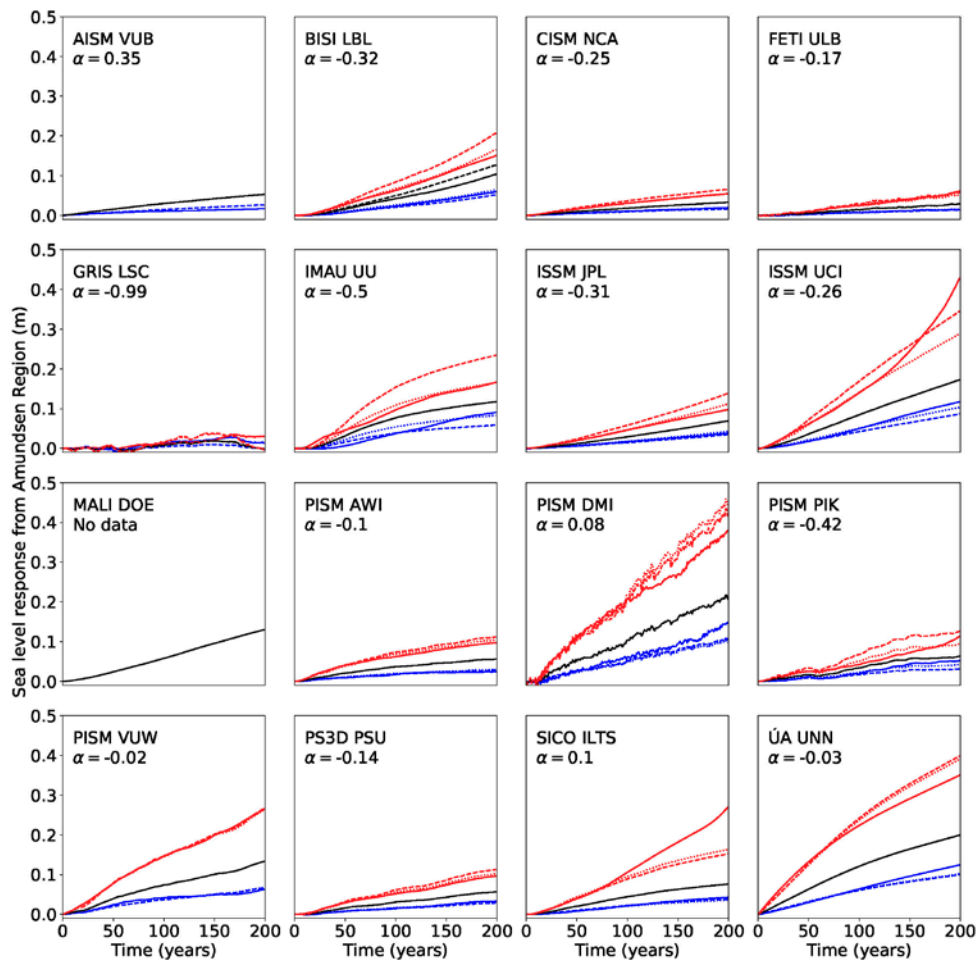

Figure 4c: Linearity check for the Amundsen region as in Figure 43a.

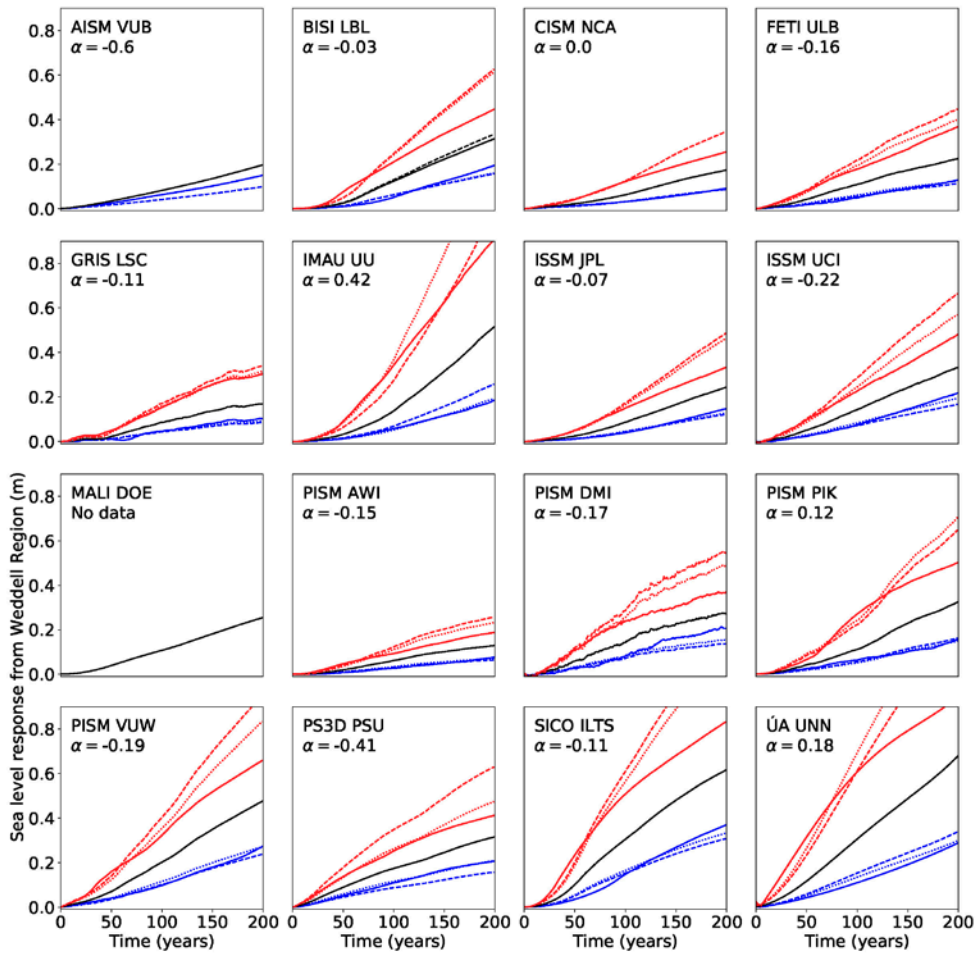

Figure 4d: Linearity check for the Weddell region as in Figure 43a.



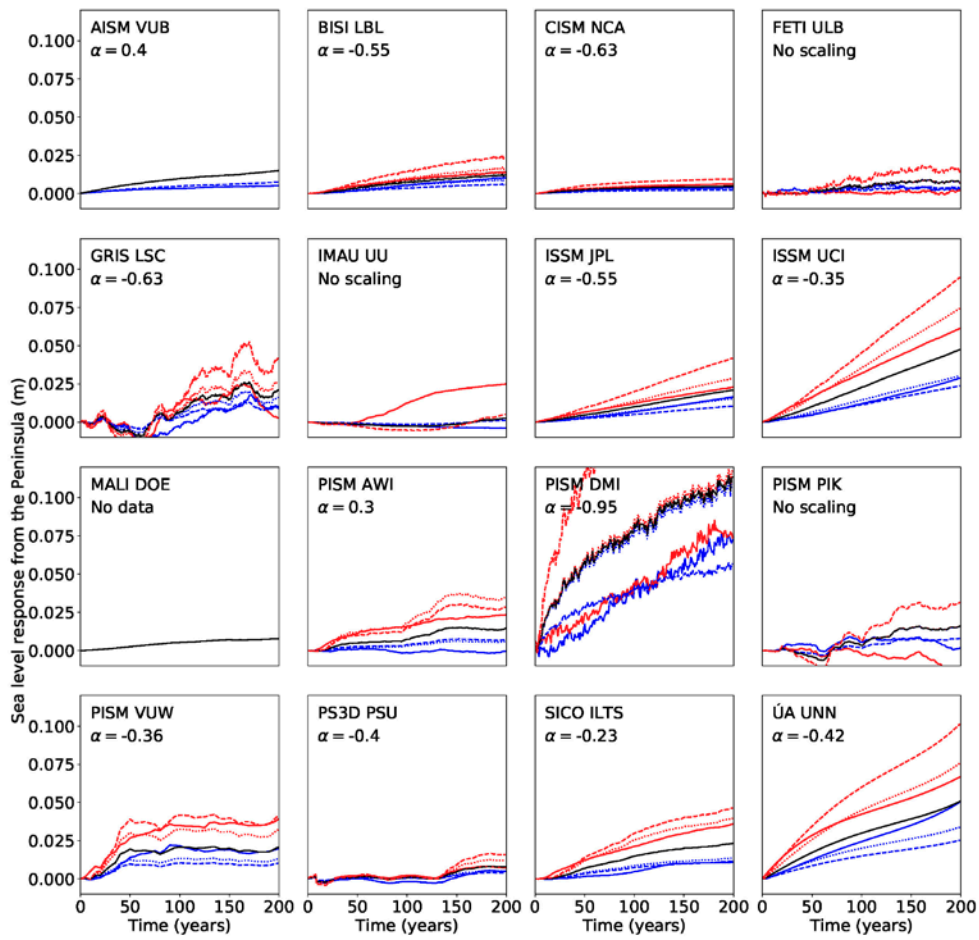

Figure 4e: Linearity check for the Antarctic Peninsula as in Figure 43a.

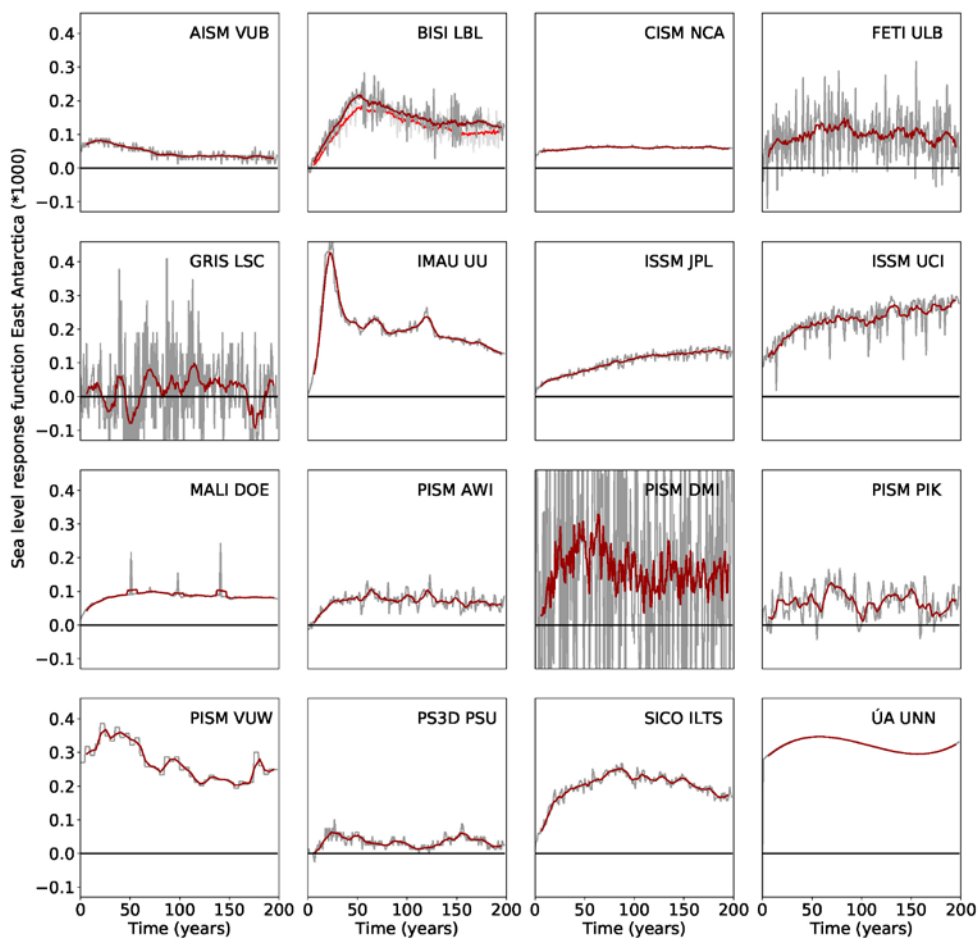

**Figure 5a: Response function for region East Antarctica** Response function computed from the time derivative of the response of the ice sheet models within the experiment with additional basal melting of 8 m/yr divided by 8 m/yr. The response function is thus unit-less in this specific case. The red line provides a 10-year running mean. For the BISICLES model also the simulation with 1km horizontal resolution (as compared to the main simulation with 500m horizontal resolution that is used for the projections) is shown. These are the light grey lines and the light red 10-year running mean.

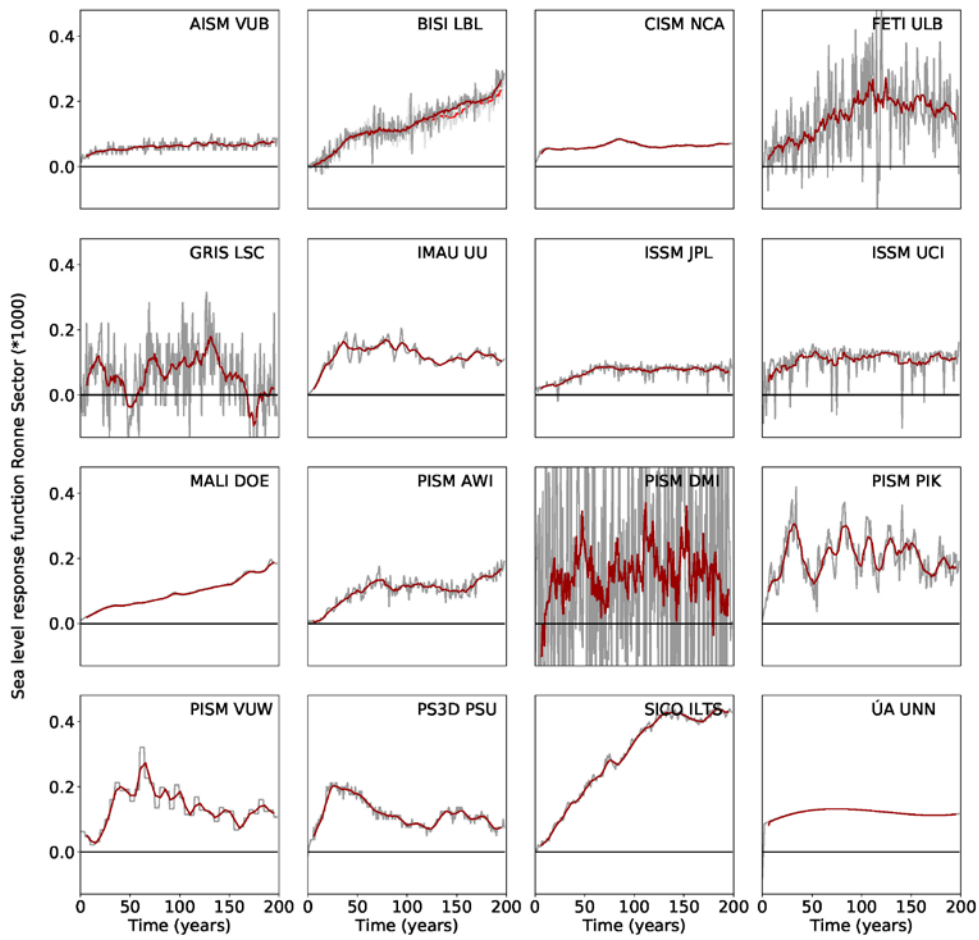

Figure 5b: Response function for region Weddell Sea as in Figure 54a.

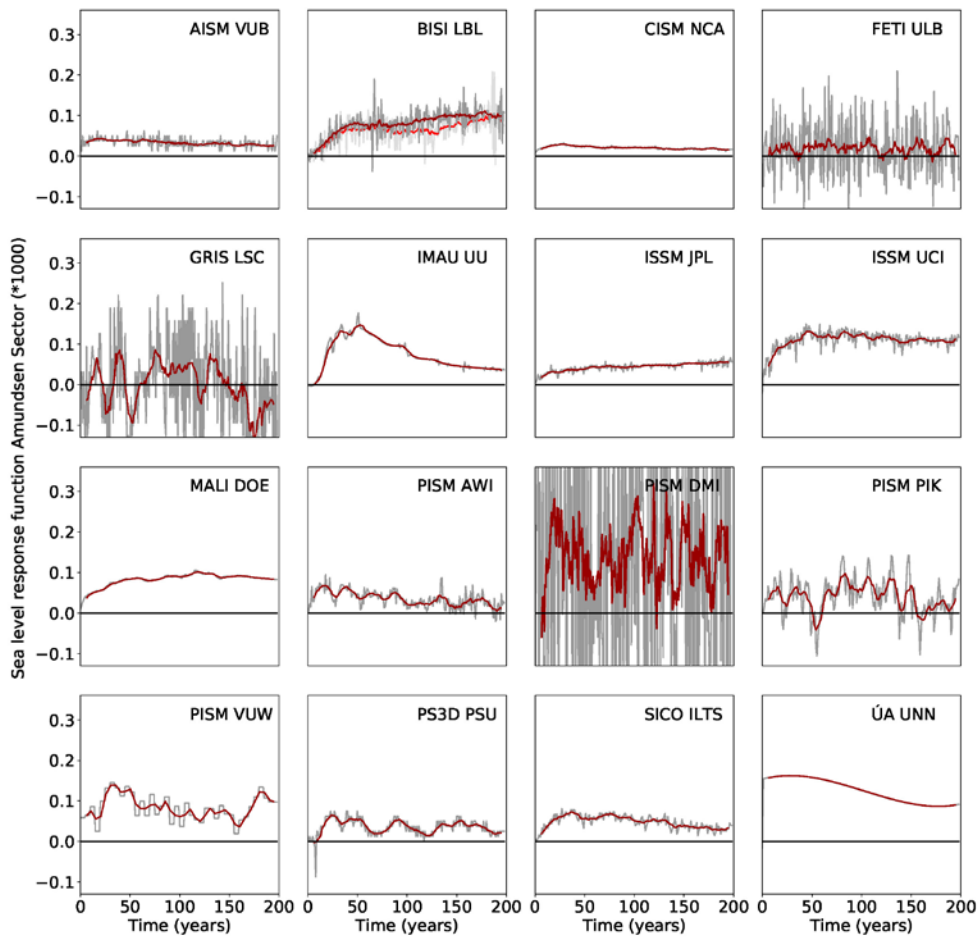

Figure 5c: Response function for region Amundsen Sea as in Figure 54a.

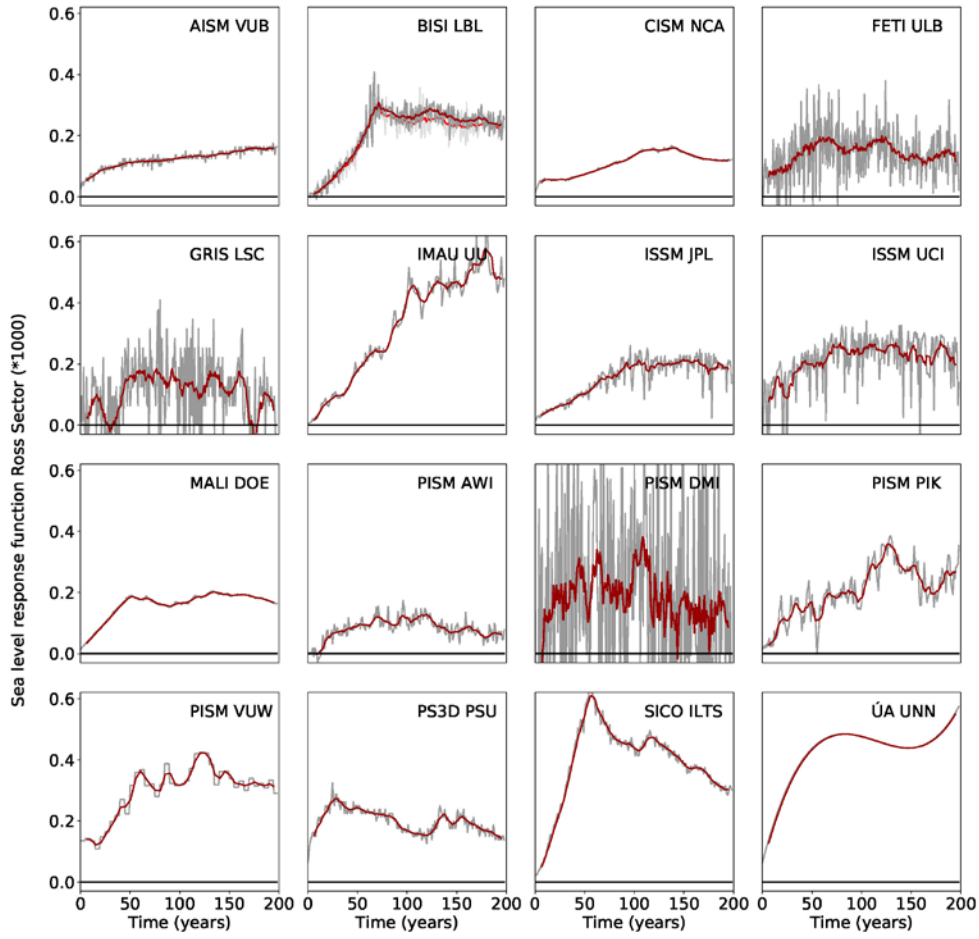

Figure 5d: Response function for region Ross Sea as in Figure 54a.

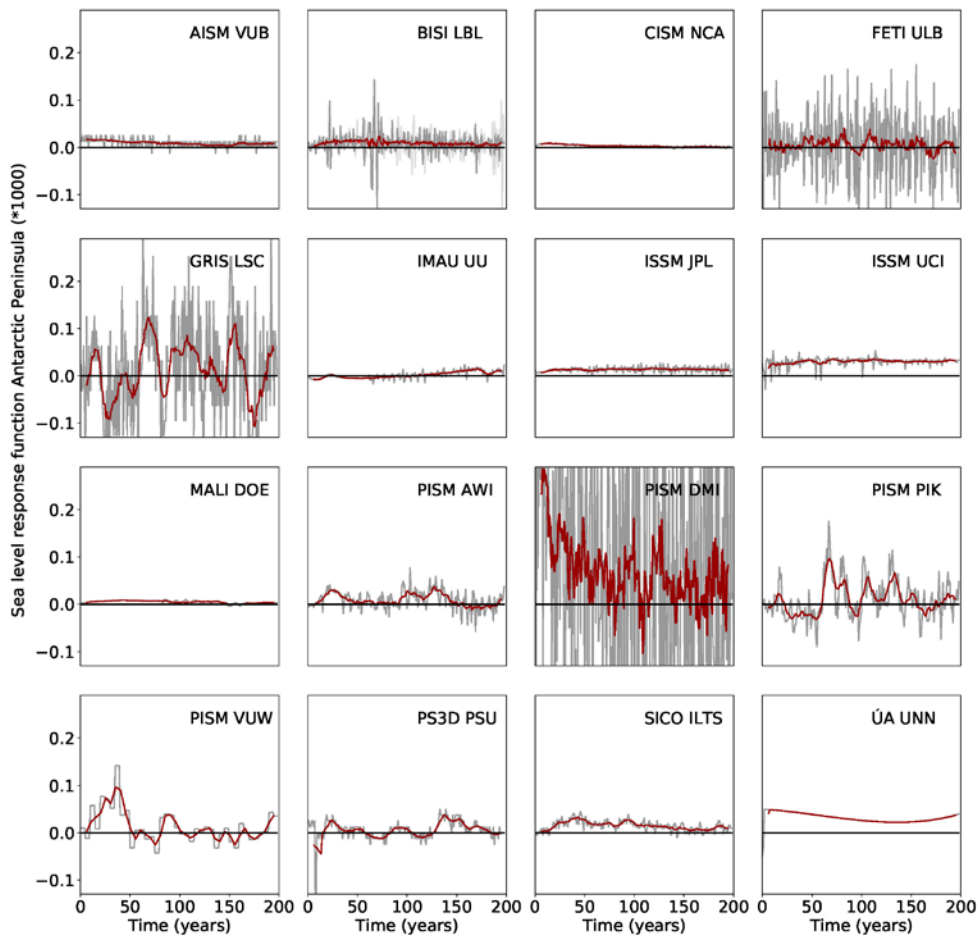

Figure 5e: Response function for region Antarctic Peninsula as in Figure 54a.

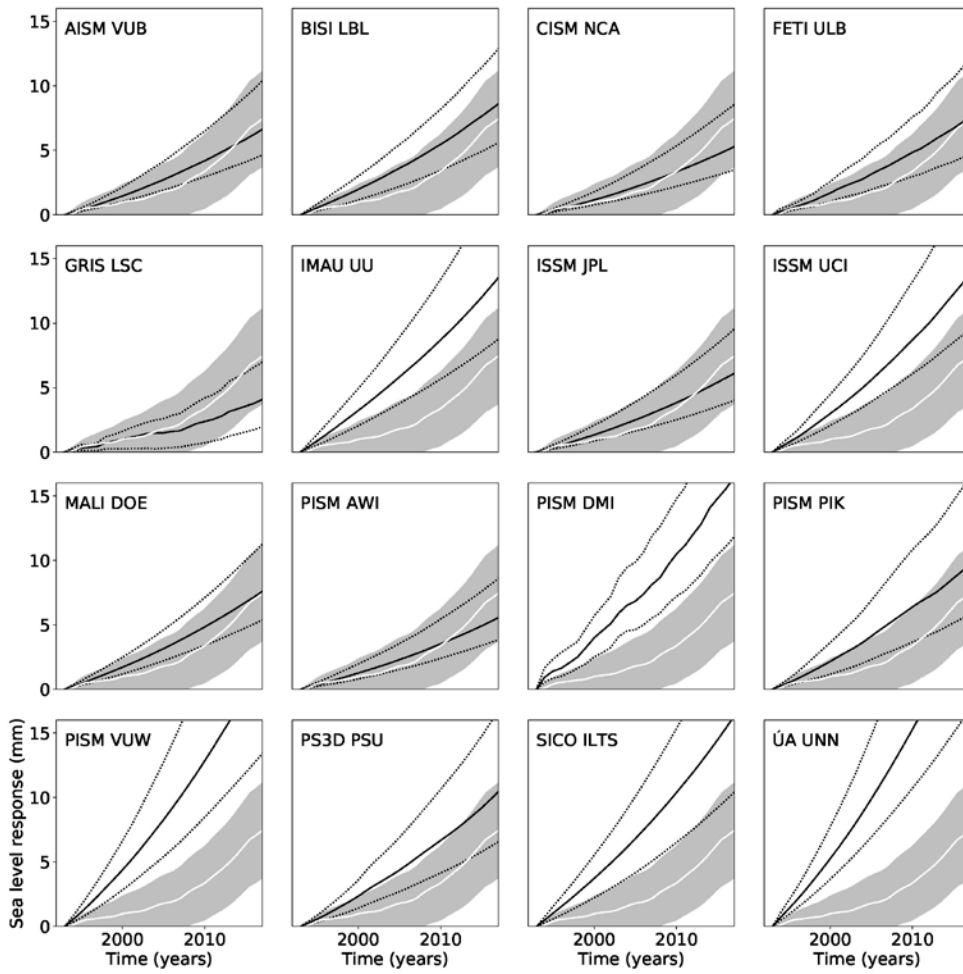

**Figure 6: Hindcasting observed sea-level contributions** Modelled sea-level contribution of Antarctica from the different ice sheet models. The solid black line represents the median contribution between 1992 and 2017 with the 66-percentile (first standard deviation) around the median. The grey shading represents the uncertainty range of the observed contribution of Antarctica (white solid line) following (Shepherd et al., 2018).

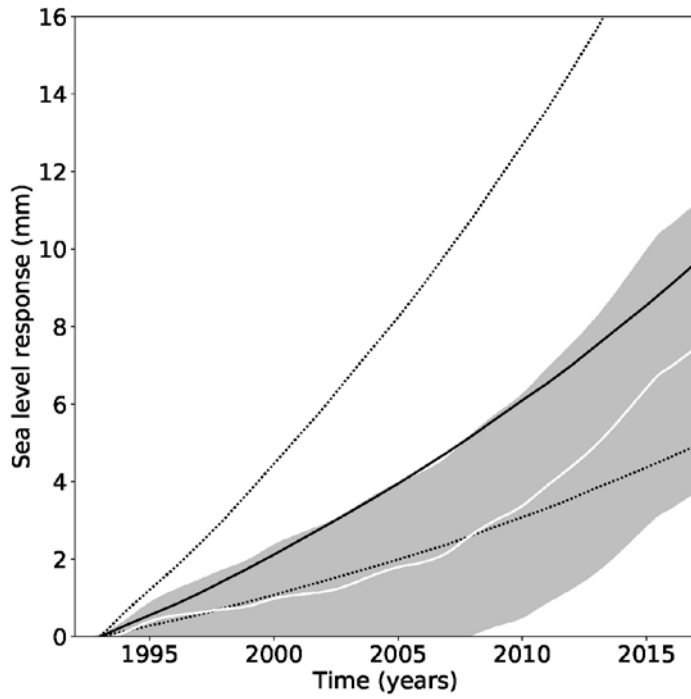

5 **Figure 7: Hindcasting of all models combined observed sea-level contributions** Modelled sea-level contribution of Antarctica from the different ice sheet models. The solid black line represents the median contribution between 1992 and 2017 with the 66-percentile (first standard deviation) around the median. The grey shading represents the uncertainty range of the observed contribution of Antarctica (white solid line) following (Shepherd et al., 2018).

10



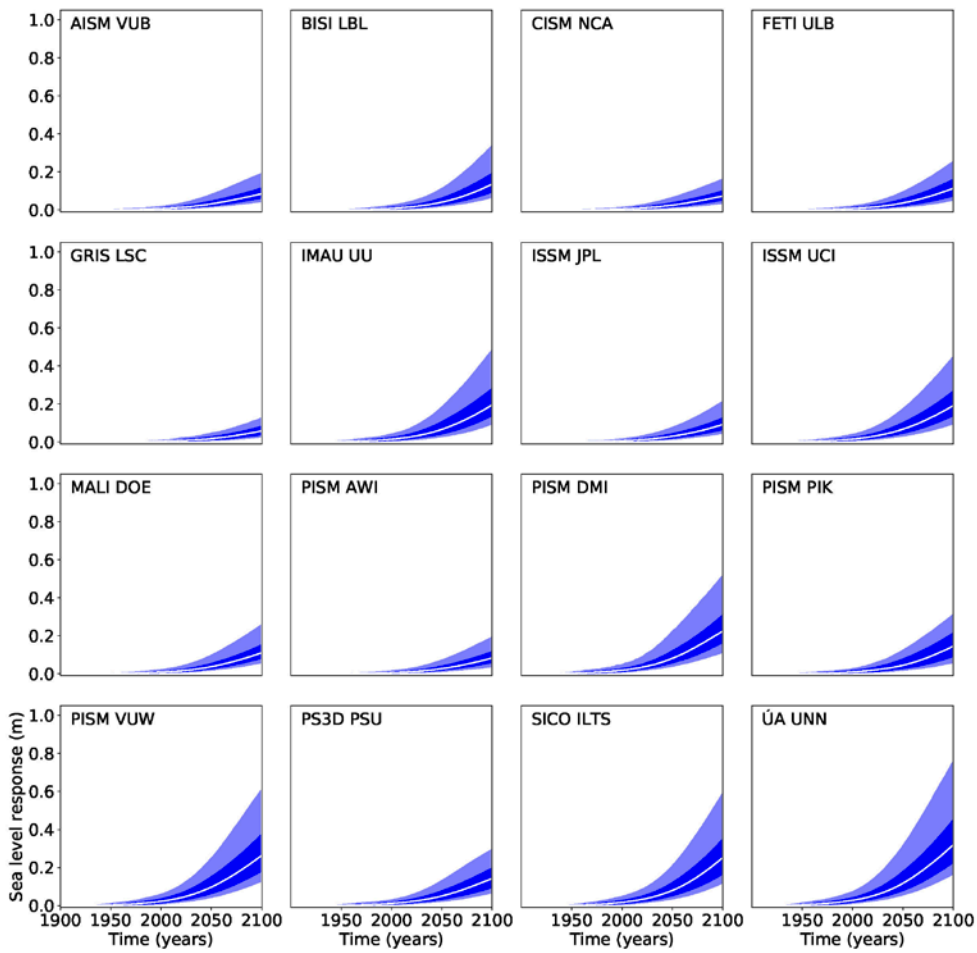

**Figure 8: Projection of Antarctica’s sea level contribution under the RCP-2.6 carbon concentration scenario** following the procedure depicted in Figure 1 and detailed in Section 2. The white line represents the median value, the dark shading the likely range (66-percentile around the median) and the light shading the very likely range (90-percentile around median). Compare Tables 7-10 for the values and their comparison to the other scenarios.

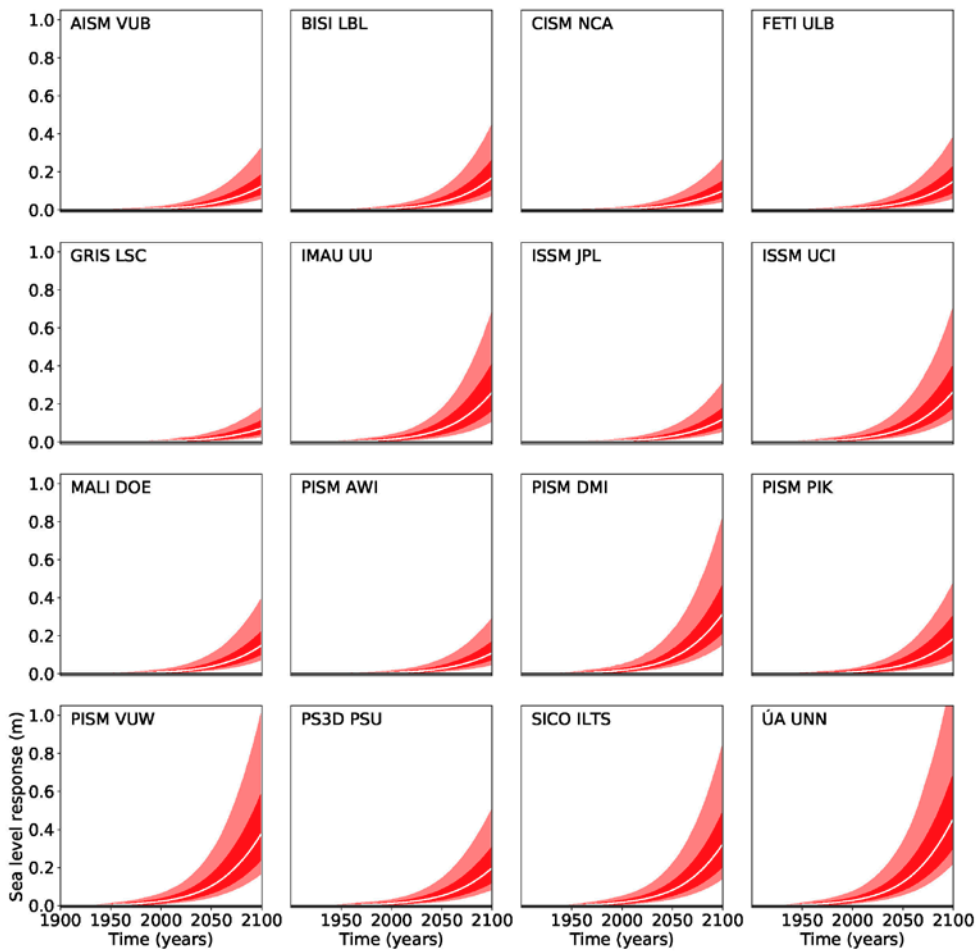

**Figure 9: Projection of Antarctica’s sea level contribution under the RCP-8.5 carbon concentration scenario** following the procedure depicted in Figure 1 and detailed in Section 2. The white line represents the median value, the dark shading the likely range (66-percentile around the median) and the light shading the very likely range (90-percentile around median). Compare Tables 7-10 for the values and their comparison to the other scenarios.

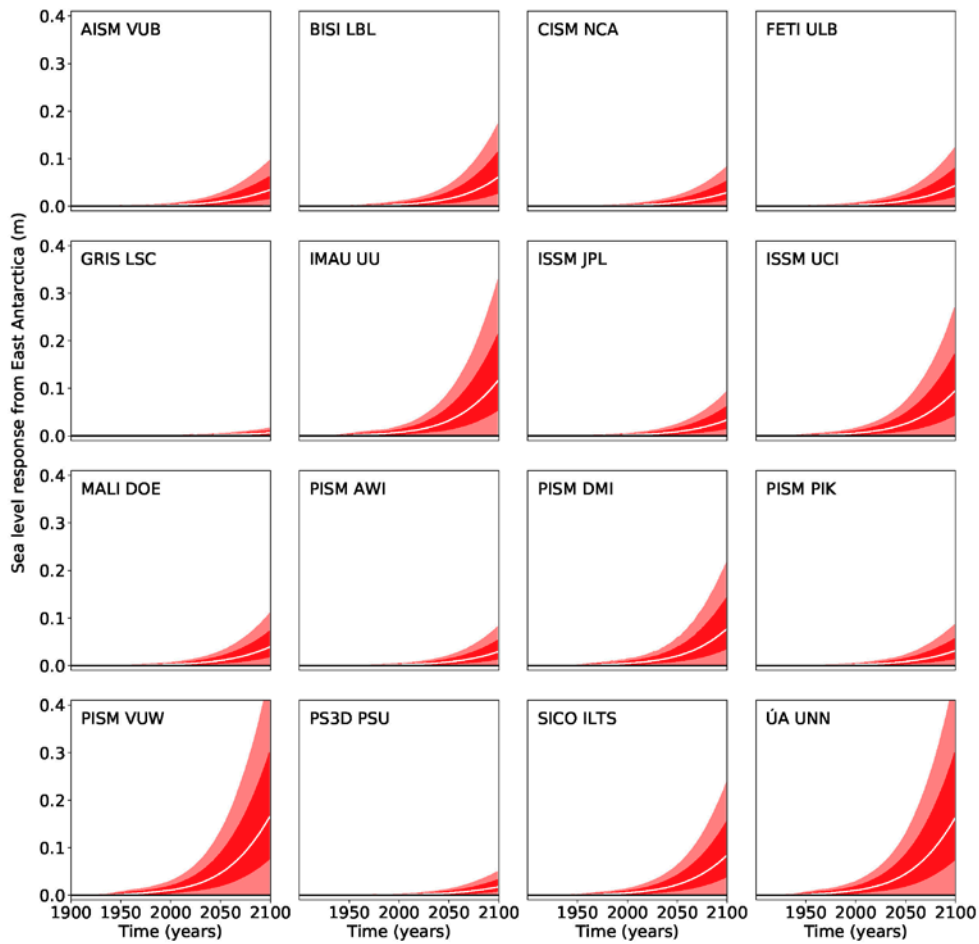

**Figure 10a: Projection of East Antarctica’s sea level contribution under the RCP-8.5 carbon concentration scenario** following the procedure depicted in Figure 1 and detailed in Section 2. The white line represents the median value, the dark shading the likely range (66-percentile around the median) and the light shading the very likely range (90-percentile around median).

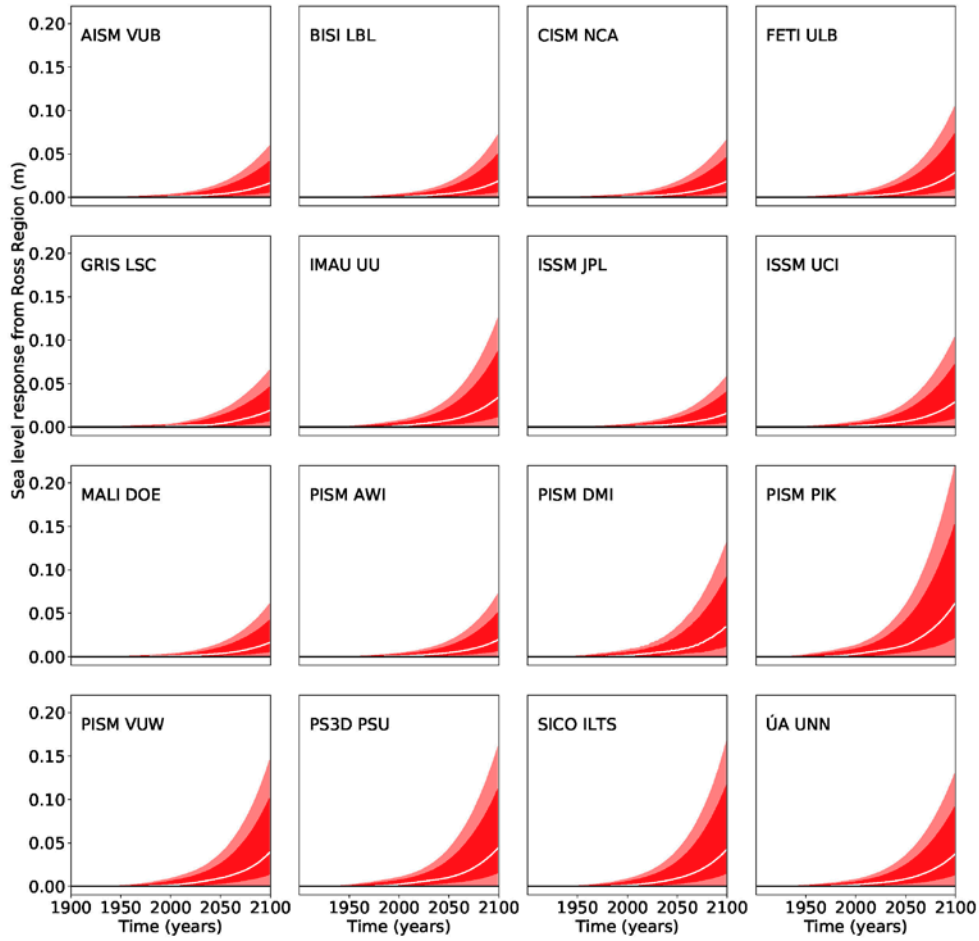

**Figure 10b: Projection of Ross Sector's sea level contribution under the RCP-8.5 carbon concentration scenario as in Figure 10a.**

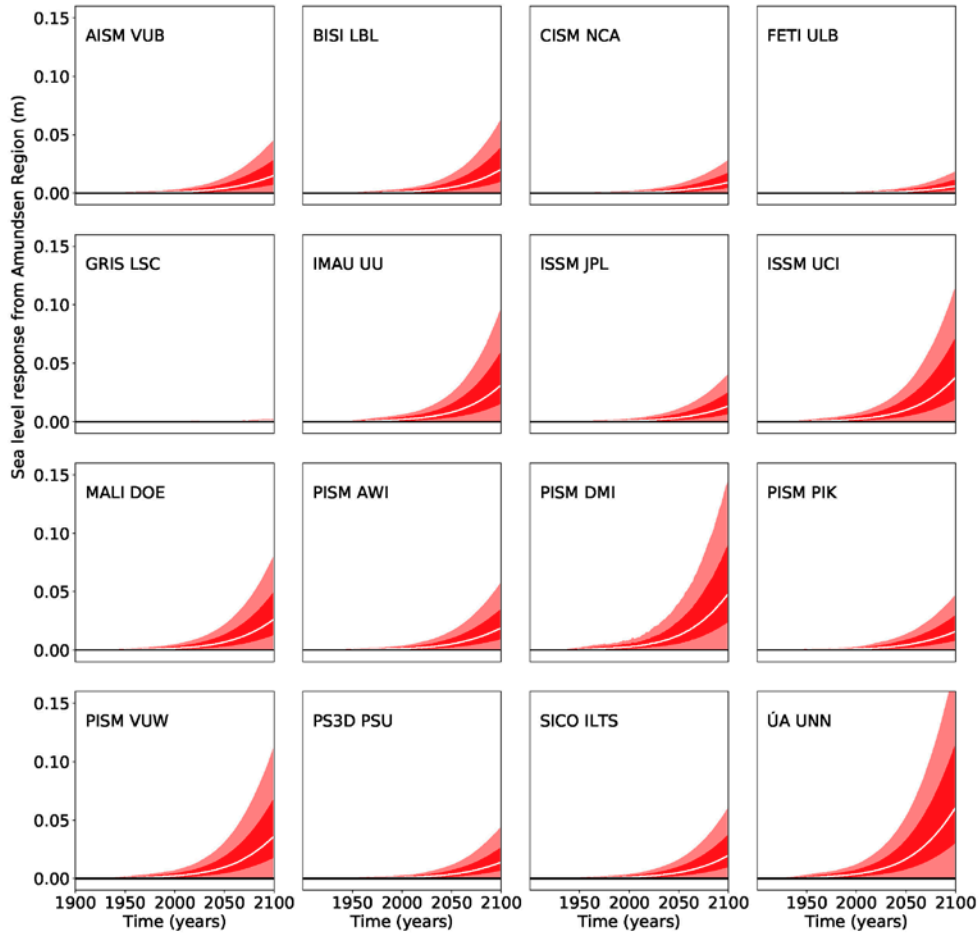

**Figure 10c: Projection of Amundsen Sector's sea level contribution under the RCP-8.5 carbon concentration scenario as in Figure 10a.**

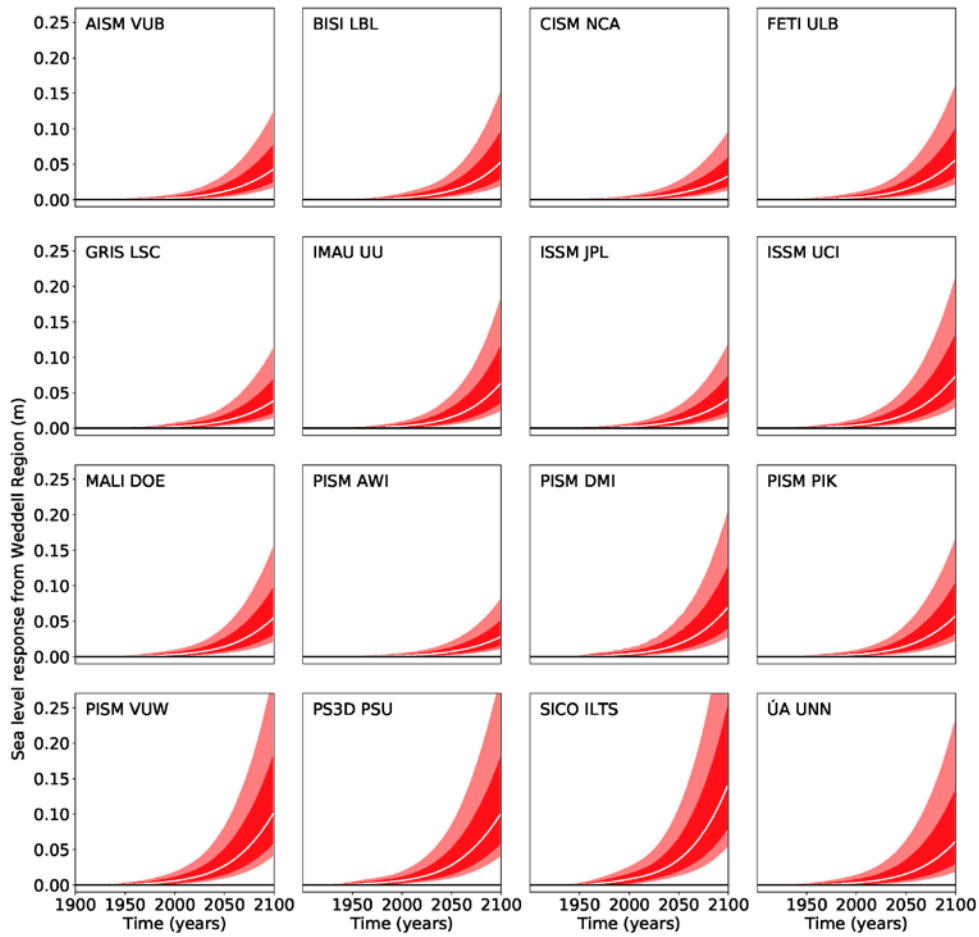

Figure 10d: Projection of Weddell Sector's sea level contribution under the RCP-8.5 carbon concentration scenario as in Figure 10a.

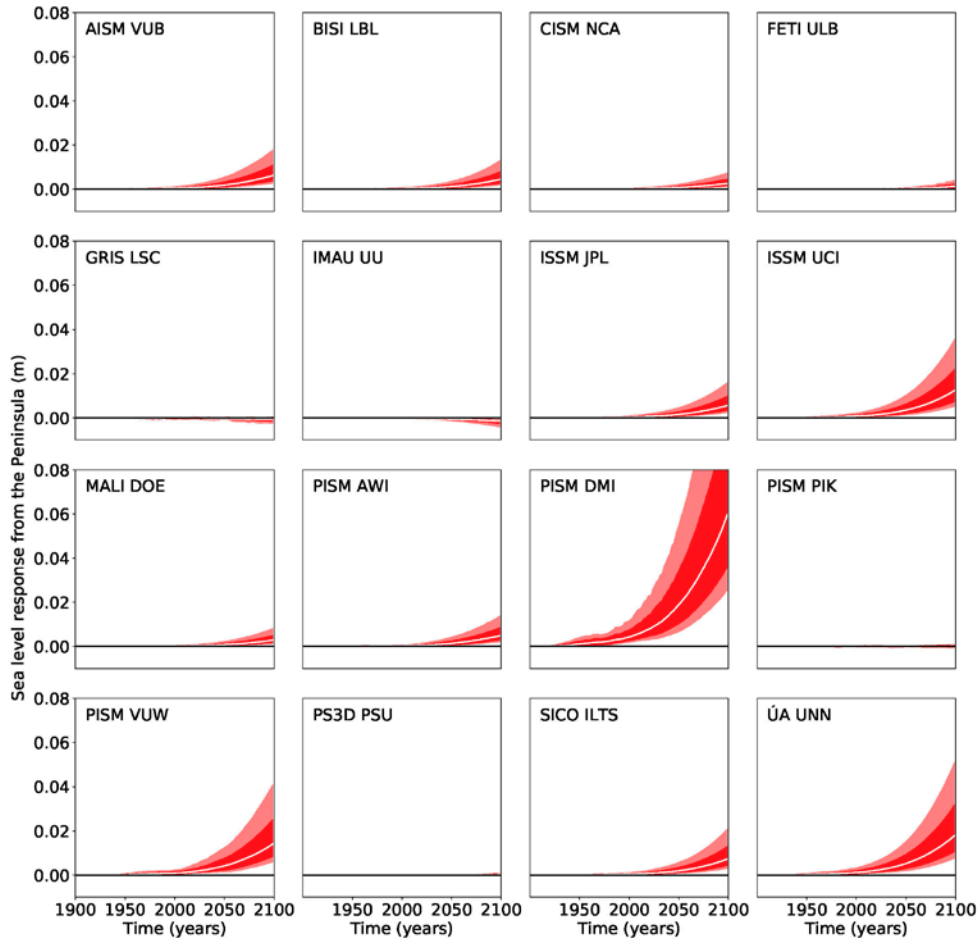

Figure 10e: Projection of the Antarctic Peninsula’s sea level contribution under the RCP-8.5 carbon concentration scenario as in Figure 10a.

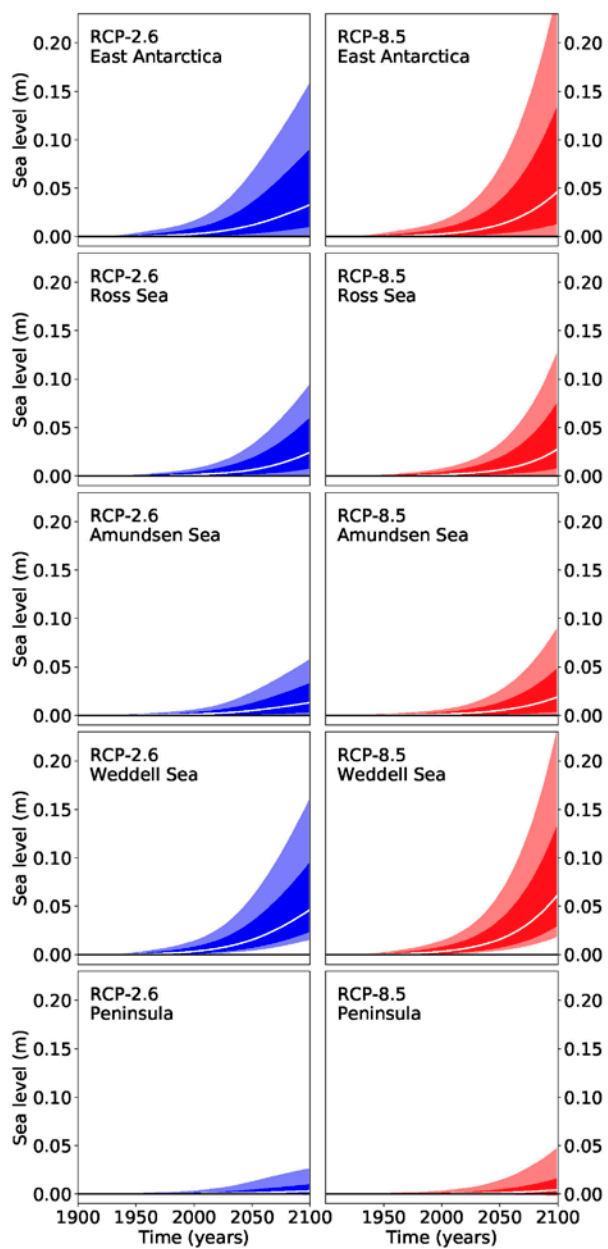

**Figure 11: Projections from all models of the future sea level contribution of the different Antarctic sectors** following the procedure depicted in Figure 1 and detailed in Section 2. The white line represents the median value, the dark shading the likely range (66-percentile around the median) and the light shading the very likely range (90-percentile around median).



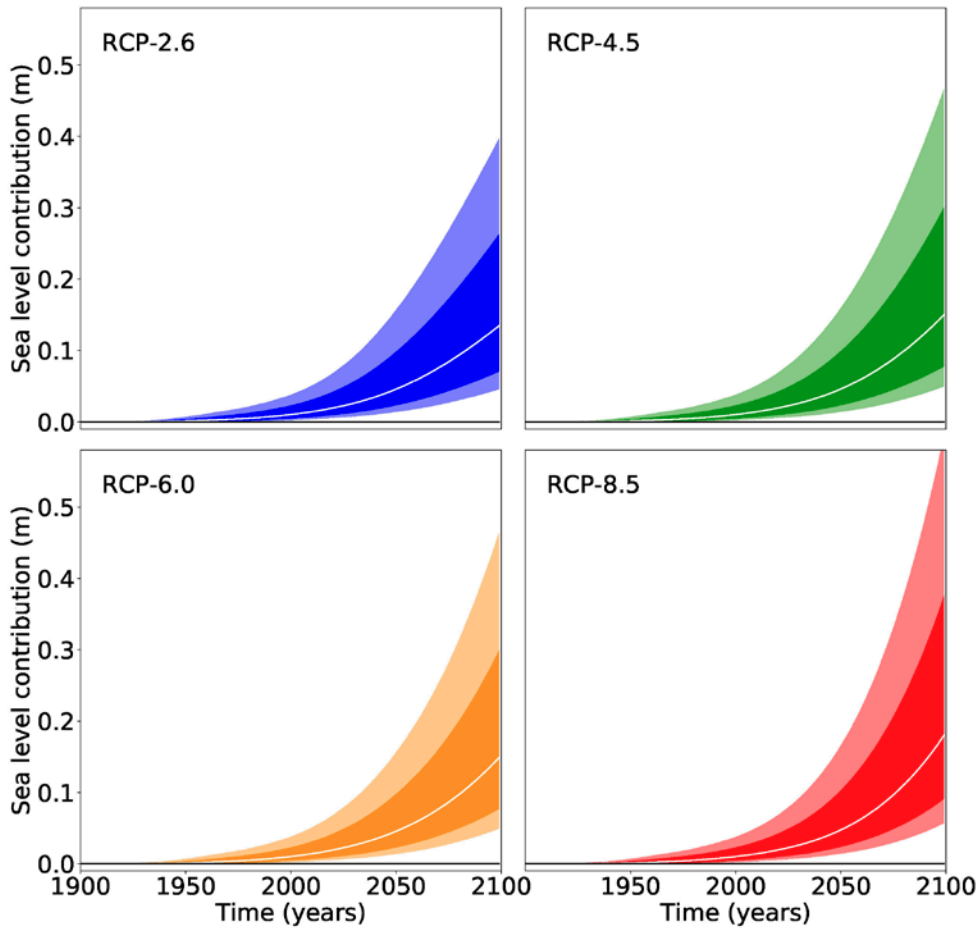

**Figure 12: Projections from all models of the future sea-level contribution of the Antarctic ice sheet under different atmospheric carbon concentration scenarios** following the procedure depicted in Figure 1 and detailed in Section 2. The white line represents the median value, the dark shading the likely range (66-percentile around the median) and the light shading the very likely range (90-percentile around median).

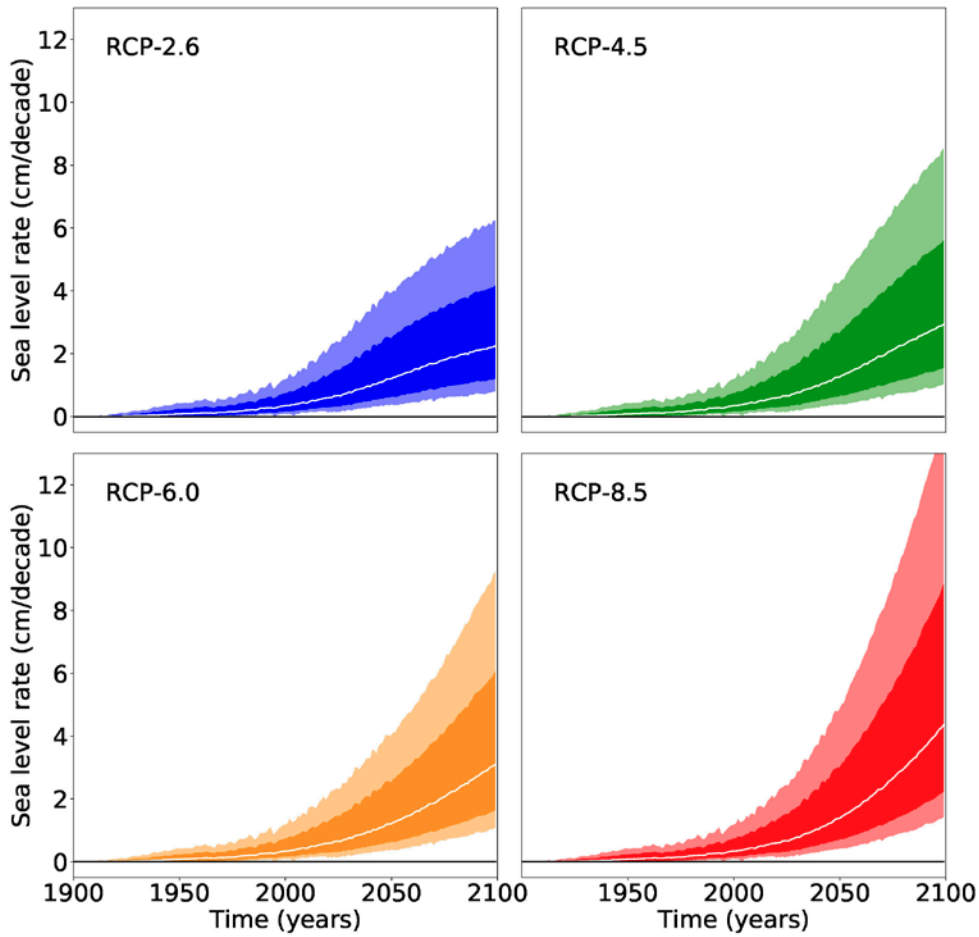

5 **Figure 13: Projections from all models of the rate of future sea-level contribution of the Antarctic ice sheet under different atmospheric carbon concentration scenarios** following the procedure depicted in Figure 1 and detailed in Section 2. The white line represents the median value, the dark shading the likely range (66-percentile around the median) and the light shading the very likely range (90-percentile around median).

## Tables

| Region          | Depth [m] |
|-----------------|-----------|
| East Antarctica | 369       |
| Ross Sea        | 312       |
| Amundsen Sea    | 305       |
| Weddell Sea     | 420       |
| Peninsula       | 420       |

**Table 1:** Mean depth of ice shelves in the different regions denoted in Figure 2 as computed from (Le Brocq et al., 2010) consistent with the previous study (Levermann et al., 2014) in order to make the results comparable. Oceanic temperature anomalies were averaged vertically over a range of 100m around these depth.

| Model          | without $\tau$ |       | $\tau$<br>[yr] | with $\tau$ |       |
|----------------|----------------|-------|----------------|-------------|-------|
|                | Coeff.         | $r^2$ |                | Coeff.      | $r^2$ |
| ACCESS1-0      | 0.20           | 0.92  | 30             | 0.35        | 0.94  |
| ACCESS1-3      | 0.27           | 0.92  | 0              | 0.27        | 0.92  |
| BNU-ESM        | 0.35           | 0.92  | 0              | 0.35        | 0.92  |
| CanESM2        | 0.21           | 0.96  | 0              | 0.21        | 0.96  |
| CCSM4          | 0.13           | 0.96  | 5              | 0.13        | 0.97  |
| CESM1-BGC      | 0.12           | 0.94  | 25             | 0.17        | 0.95  |
| CESM1-CAM5     | 0.15           | 0.94  | 0              | 0.15        | 0.94  |
| CSIRO-Mk3-6-0  | 0.22           | 0.93  | 15             | 0.28        | 0.94  |
| FGOALS-s2      | 0.17           | 0.90  | 55             | 0.41        | 0.94  |
| GFDL-CM3       | 0.21           | 0.89  | 35             | 0.39        | 0.93  |
| HadGEM2-ES     | 0.23           | 0.95  | 0              | 0.23        | 0.95  |
| INMCM4         | 0.55           | 0.97  | 0              | 0.55        | 0.97  |
| IPSL-CM5A-MR   | 0.14           | 0.89  | 0              | 0.14        | 0.89  |
| MIROC-ESM-CHEM | 0.11           | 0.89  | 0              | 0.11        | 0.89  |
| MIROC-ESM      | 0.09           | 0.85  | 50             | 0.24        | 0.88  |
| MPI-ESM-LR     | 0.20           | 0.94  | 15             | 0.26        | 0.95  |
| MRI-CGCM3      | 0.26           | 0.94  | 0              | 0.26        | 0.94  |
| NorESM1-M      | 0.15           | 0.76  | 0              | 0.15        | 0.76  |
| NorESM1-ME     | 0.15           | 0.74  | 60             | 0.49        | 0.85  |

5 **Table 2:** East Antarctic sector: scaling coefficients  $\alpha_{r_2}$  and time delay  $\tau_{r_2}$  between increases in global mean temperature and subsurface ocean temperature anomalies.

| Model          | Without $\tau$ |       | $\tau$<br>[yr] | with $\tau$ |       |
|----------------|----------------|-------|----------------|-------------|-------|
|                | Coeff.         | $r^2$ |                | Coeff.      | $r^2$ |
| ACCESS1-0      | 0.17           | 0.86  | 0              | 0.17        | 0.86  |
| ACCESS1-3      | 0.30           | 0.94  | 0              | 0.30        | 0.94  |
| BNU-ESM        | 0.37           | 0.88  | 30             | 0.56        | 0.92  |
| CanESM2        | 0.15           | 0.83  | 30             | 0.24        | 0.88  |
| CCSM4          | 0.22           | 0.89  | 0              | 0.22        | 0.89  |
| CESM1-BGC      | 0.19           | 0.92  | 0              | 0.19        | 0.92  |
| CESM1-CAM5     | 0.12           | 0.92  | 0              | 0.12        | 0.92  |
| CSIRO-Mk3-6-0  | 0.16           | 0.79  | 30             | 0.28        | 0.83  |
| FGOALS-s2      | 0.24           | 0.90  | 55             | 0.54        | 0.93  |
| GFDL-CM3       | 0.26           | 0.81  | 35             | 0.49        | 0.85  |
| HadGEM2-ES     | 0.23           | 0.70  | 0              | 0.23        | 0.70  |
| INMCM4         | 0.67           | 0.90  | 0              | 0.67        | 0.90  |
| IPSL-CM5A-MR   | 0.07           | 0.22  | 90             | 0.44        | 0.45  |
| MIROC-ESM-CHEM | 0.12           | 0.74  | 5              | 0.13        | 0.75  |
| MIROC-ESM      | 0.11           | 0.55  | 60             | 0.35        | 0.61  |
| MPI-ESM-LR     | 0.27           | 0.80  | 5              | 0.29        | 0.82  |
| MRI-CGCM3      | 0.00           | 0.02  | 85             | -0.07       | 0.04  |
| NorESM1-M      | 0.30           | 0.94  | 0              | 0.30        | 0.94  |
| NorESM1-ME     | 0.31           | 0.89  | 0              | 0.31        | 0.89  |

**Table 3:** Ross Sea sector: scaling coefficients,  $\alpha_r$ , and time delay,  $\tau_r$ , and time delay  $\tau$  between increases in global mean temperature and subsurface ocean temperature anomalies.

| Model          | Without $\tau$ |       | $\tau$<br>[yr] | with $\tau$ |       |
|----------------|----------------|-------|----------------|-------------|-------|
|                | Coeff.         | $r^2$ |                | Coeff.      | $r^2$ |
| ACCESS1-0      | 0.17           | 0.86  | 0              | 0.17        | 0.86  |
| ACCESS1-3      | 0.30           | 0.94  | 0              | 0.30        | 0.94  |
| BNU-ESM        | 0.37           | 0.88  | 30             | 0.56        | 0.92  |
| CanESM2        | 0.15           | 0.83  | 30             | 0.24        | 0.88  |
| CCSM4          | 0.22           | 0.89  | 0              | 0.22        | 0.89  |
| CESM1-BGC      | 0.19           | 0.92  | 0              | 0.19        | 0.92  |
| CESM1-CAM5     | 0.12           | 0.92  | 0              | 0.12        | 0.92  |
| CSIRO-Mk3-6-0  | 0.16           | 0.79  | 30             | 0.28        | 0.83  |
| FGOALS-s2      | 0.24           | 0.90  | 55             | 0.54        | 0.93  |
| GFDL-CM3       | 0.26           | 0.81  | 35             | 0.49        | 0.85  |
| HadGEM2-ES     | 0.23           | 0.70  | 0              | 0.23        | 0.70  |
| INMCM4         | 0.67           | 0.90  | 0              | 0.67        | 0.90  |
| IPSL-CM5A-MR   | 0.07           | 0.22  | 90             | 0.44        | 0.45  |
| MIROC-ESM-CHEM | 0.12           | 0.74  | 5              | 0.13        | 0.75  |
| MIROC-ESM      | 0.11           | 0.55  | 60             | 0.35        | 0.61  |
| MPI-ESM-LR     | 0.27           | 0.80  | 5              | 0.29        | 0.82  |
| MRI-CGCM3      | 0.00           | 0.02  | 85             | 0.00        | 0.04  |
| NorESM1-M      | 0.30           | 0.94  | 0              | 0.30        | 0.94  |
| NorESM1-ME     | 0.31           | 0.89  | 0              | 0.31        | 0.89  |

5 **Table 4:** Amundsen Sea sector: scaling coefficients,  $\alpha_{r_2}$  and time delay,  $\tau_{r_2}$  and time delay  $\tau$  between increases in global mean temperature and subsurface ocean temperature anomalies.

| Model          | Coeff.         | $r^2$ | $\tau$ | Coeff.      | $r^2$ |
|----------------|----------------|-------|--------|-------------|-------|
|                | Without $\tau$ |       | [yr]   | with $\tau$ |       |
| ACCESS1-0      | 0.18           | 0.77  | 20     | 0.26        | 0.79  |
| ACCESS1-3      | 0.09           | 0.76  | 15     | 0.12        | 0.77  |
| BNU-ESM        | 0.28           | 0.83  | 20     | 0.36        | 0.84  |
| CanESM2        | 0.14           | 0.74  | 45     | 0.32        | 0.80  |
| CCSM4          | 0.14           | 0.91  | 5      | 0.15        | 0.92  |
| CESM1-BGC      | 0.14           | 0.90  | 0      | 0.14        | 0.90  |
| CESM1-CAM5     | 0.16           | 0.85  | 0      | 0.16        | 0.85  |
| CSIRO-Mk3-6-0  | 0.00           | 0.28  | 0      | 0.00        | 0.28  |
| FGOALS-s2      | 0.18           | 0.89  | 60     | 0.45        | 0.93  |
| GFDL-CM3       | 0.23           | 0.85  | 25     | 0.37        | 0.89  |
| HadGEM2-ES     | 0.25           | 0.62  | 0      | 0.25        | 0.62  |
| INMCM4         | 0.59           | 0.83  | 0      | 0.59        | 0.83  |
| IPSL-CM5A-MR   | 0.02           | 0.04  | 95     | 0.14        | 0.12  |
| MIROC-ESM-CHEM | 0.23           | 0.85  | 0      | 0.23        | 0.85  |
| MIROC-ESM      | 0.23           | 0.78  | 0      | 0.23        | 0.78  |
| MPI-ESM-LR     | 0.16           | 0.70  | 40     | 0.31        | 0.73  |
| MRI-CGCM3      | 0.08           | 0.04  | 0      | 0.08        | 0.04  |
| NorESM1-M      | 0.12           | 0.79  | 0      | 0.12        | 0.79  |
| NorESM1-ME     | 0.12           | 0.68  | 20     | 0.16        | 0.73  |

**Table 5:** Weddell Sea sector and Antarctic Peninsula: scaling coefficients,  $\alpha_r$ , and time delay,  $\tau_r$ , and time delay  $\tau$  between increases in global mean temperature and subsurface ocean temperature anomalies.

5

| Observed & modelled contribution 1992 to 2017 | Antarctica sea level contribution percentiles (mm) |      |       |
|-----------------------------------------------|----------------------------------------------------|------|-------|
|                                               | 16.6%                                              | 50%  | 83.3% |
| Observations                                  | 3.7                                                | 7.4  | 11.1  |
| All models                                    | 5.2                                                | 10.2 | 21.3  |
| AISM VUB                                      | 4.9                                                | 7.0  | 11.0  |
| BISI LBL                                      | 5.9                                                | 9.1  | 13.6  |
| CISM NCA                                      | 3.7                                                | 5.6  | 9.0   |
| FETI ULB                                      | 4.9                                                | 8.0  | 12.8  |
| GRIS LSC                                      | 2.2                                                | 4.5  | 7.6   |
| IMAU UU                                       | 9.2                                                | 14.3 | 22.5  |
| ISSM JPL                                      | 4.2                                                | 6.5  | 10.1  |
| ISSM UCI                                      | 10.2                                               | 14.7 | 22.5  |
| MALI DOE                                      | 5.7                                                | 8.0  | 11.9  |
| PISM AWI                                      | 4.1                                                | 5.9  | 9.1   |
| PISM DMI                                      | 12.6                                               | 17.4 | 25.3  |
| PISM PIK                                      | 6.1                                                | 10.3 | 17.5  |
| PISM VUW                                      | 14.2                                               | 21.5 | 33.9  |
| PS3D PSU                                      | 6.9                                                | 11.0 | 17.7  |
| SICO ILTS                                     | 11.1                                               | 25.5 | 39.5  |
| ÚA UNN                                        | 17.8                                               | 25.5 | 39.5  |

**Table 6:** Likely range of hindcast of historical sea level contribution as compared to the observed range.



| RCP-2.6    | Antarctica sea level contribution percentiles (m) |       |      |       |      |
|------------|---------------------------------------------------|-------|------|-------|------|
| Model      | 5%                                                | 16.6% | 50%  | 83.3% | 95%  |
| AISM VUB   | 0.04                                              | 0.06  | 0.06 | 0.12  | 0.20 |
| BISI LBL   | 0.06                                              | 0.09  | 0.14 | 0.20  | 0.34 |
| CISM NCA   | 0.03                                              | 0.05  | 0.07 | 0.10  | 0.17 |
| FETI ULB   | 0.05                                              | 0.07  | 0.11 | 0.16  | 0.26 |
| GRIS LSC   | 0.02                                              | 0.04  | 0.06 | 0.08  | 0.13 |
| IMAU UU    | 0.09                                              | 0.14  | 0.20 | 0.28  | 0.49 |
| ISSM JPL   | 0.04                                              | 0.06  | 0.09 | 0.13  | 0.22 |
| ISSM UCI   | 0.09                                              | 0.14  | 0.19 | 0.27  | 0.45 |
| MALI DOE   | 0.06                                              | 0.08  | 0.11 | 0.15  | 0.26 |
| PISM AWI   | 0.04                                              | 0.06  | 0.08 | 0.12  | 0.20 |
| PISM DMI   | 0.11                                              | 0.16  | 0.22 | 0.31  | 0.52 |
| PISM PIK   | 0.06                                              | 0.09  | 0.14 | 0.22  | 0.31 |
| PISM VUW   | 0.13                                              | 0.18  | 0.26 | 0.38  | 0.62 |
| PS3D PSU   | 0.06                                              | 0.09  | 0.14 | 0.20  | 0.30 |
| SICO ILTS  | 0.12                                              | 0.16  | 0.25 | 0.35  | 0.60 |
| ÚA UNN     | 0.16                                              | 0.22  | 0.32 | 0.46  | 0.76 |
| All models | 0.05                                              | 0.07  | 0.14 | 0.27  | 0.40 |

**Table 7:** Percentiles of the probability distribution of the sea level contribution of Antarctica for different ice sheet models under the RCP-2.6 climate scenario. The 50% percentile corresponds to the media. The 16.6% - 83.3% is the so-called “likely range” as denoted in the IPCC reports. The “very likely range” is given by the 5% - 95% percentiles.

| RCP-4.5    | Antarctica sea level contribution percentiles (m) |       |      |       |      |
|------------|---------------------------------------------------|-------|------|-------|------|
| Model      | 5%                                                | 16.6% | 50%  | 83.3% | 95%  |
| AISM VUB   | 0.05                                              | 0.07  | 0.10 | 0.14  | 0.24 |
| BISI LBL   | 0.07                                              | 0.10  | 0.15 | 0.22  | 0.39 |
| CISM NCA   | 0.04                                              | 0.05  | 0.08 | 0.12  | 0.19 |
| FETI ULB   | 0.05                                              | 0.08  | 0.13 | 0.19  | 0.30 |
| GRIS LSC   | 0.03                                              | 0.04  | 0.06 | 0.09  | 0.15 |
| IMAU UU    | 0.10                                              | 0.15  | 0.22 | 0.33  | 0.56 |
| ISSM JPL   | 0.05                                              | 0.07  | 0.10 | 0.14  | 0.25 |
| ISSM UCI   | 0.10                                              | 0.15  | 0.22 | 0.32  | 0.55 |
| MALI DOE   | 0.06                                              | 0.09  | 0.12 | 0.18  | 0.31 |
| PISM AWI   | 0.04                                              | 0.06  | 0.09 | 0.14  | 0.23 |
| PISM DMI   | 0.13                                              | 0.18  | 0.26 | 0.36  | 0.64 |
| PISM PIK   | 0.06                                              | 0.10  | 0.16 | 0.25  | 0.37 |
| PISM VUW   | 0.14                                              | 0.20  | 0.30 | 0.45  | 0.76 |
| PS3D PSU   | 0.07                                              | 0.10  | 0.16 | 0.24  | 0.37 |
| SICO ILTS  | 0.12                                              | 0.18  | 0.28 | 0.40  | 0.69 |
| ÚA UNN     | 0.18                                              | 0.25  | 0.37 | 0.53  | 0.90 |
| All models | 0.05                                              | 0.08  | 0.15 | 0.31  | 0.47 |

**Table 8:** Percentiles of the probability distribution of the sea level contribution of Antarctica for different ice sheet models under the RCP-4.5 climate scenario. The 50% percentile corresponds to the media. The 16.6% - 83.3% is the so-called “likely range” as denoted in the IPCC reports. The “very likely range” is given by the 5% - 95%.

| RCP-6.0    | Antarctica sea level contribution percentiles (m) |       |      |       |      |
|------------|---------------------------------------------------|-------|------|-------|------|
| Model      | 5%                                                | 16.6% | 50%  | 83.3% | 95%  |
| AISM VUB   | 0.05                                              | 0.07  | 0.10 | 0.14  | 0.25 |
| BISILBL    | 0.07                                              | 0.10  | 0.14 | 0.22  | 0.37 |
| CISM NCA   | 0.04                                              | 0.05  | 0.08 | 0.12  | 0.20 |
| FETI ULB   | 0.05                                              | 0.08  | 0.13 | 0.19  | 0.30 |
| GRIS LSC   | 0.03                                              | 0.04  | 0.06 | 0.09  | 0.15 |
| IMAU UU    | 0.10                                              | 0.14  | 0.22 | 0.33  | 0.53 |
| ISSM JPL   | 0.05                                              | 0.07  | 0.10 | 0.14  | 0.25 |
| ISSM UCI   | 0.10                                              | 0.15  | 0.22 | 0.32  | 0.54 |
| MALI DOE   | 0.06                                              | 0.09  | 0.12 | 0.18  | 0.31 |
| PISM AWI   | 0.04                                              | 0.06  | 0.09 | 0.13  | 0.22 |
| PISM DMI   | 0.13                                              | 0.18  | 0.26 | 0.36  | 0.64 |
| PISM PIK   | 0.06                                              | 0.09  | 0.16 | 0.25  | 0.37 |
| PISM VUW   | 0.14                                              | 0.20  | 0.30 | 0.45  | 0.77 |
| PS3D PSU   | 0.07                                              | 0.10  | 0.16 | 0.24  | 0.38 |
| SICO ILTS  | 0.12                                              | 0.18  | 0.27 | 0.40  | 0.67 |
| ÚA UNN     | 0.18                                              | 0.25  | 0.37 | 0.54  | 0.93 |
| All models | 0.05                                              | 0.08  | 0.15 | 0.31  | 0.47 |

**Table 9:** Percentiles of the probability distribution of the sea level contribution of Antarctica for different ice sheet models under the RCP-6.0 climate scenario. The 50% percentile corresponds to the media. The 16.6% - 83.3% is the so-called “likely range” as denoted in the IPCC reports. The “very likely range” is given by the 5% - 95% percentiles.

| RCP-8.5    | Antarctica sea level contribution percentiles (m) |       |      |       |      |
|------------|---------------------------------------------------|-------|------|-------|------|
| Model      | 5%                                                | 16.6% | 50%  | 83.3% | 95%  |
| AISM VUB   | 0.06                                              | 0.08  | 0.13 | 0.19  | 0.33 |
| BISI LBL   | 0.08                                              | 0.11  | 0.17 | 0.27  | 0.46 |
| CISM NCA   | 0.04                                              | 0.06  | 0.10 | 0.16  | 0.27 |
| FETI ULB   | 0.06                                              | 0.09  | 0.15 | 0.23  | 0.39 |
| GRIS LSC   | 0.03                                              | 0.04  | 0.07 | 0.11  | 0.18 |
| IMAU UU    | 0.11                                              | 0.17  | 0.26 | 0.42  | 0.70 |
| ISSM JPL   | 0.05                                              | 0.08  | 0.12 | 0.18  | 0.31 |
| ISSM UCI   | 0.12                                              | 0.18  | 0.27 | 0.41  | 0.71 |
| MALI DOE   | 0.07                                              | 0.10  | 0.15 | 0.23  | 0.40 |
| PISM AWI   | 0.05                                              | 0.07  | 0.11 | 0.17  | 0.30 |
| PISM DMI   | 0.15                                              | 0.22  | 0.33 | 0.47  | 0.83 |
| PISM PIK   | 0.07                                              | 0.11  | 0.19 | 0.31  | 0.48 |
| PISM VUW   | 0.17                                              | 0.24  | 0.38 | 0.60  | 1.03 |
| PS3D PSU   | 0.08                                              | 0.12  | 0.20 | 0.31  | 0.51 |
| SICO ILTS  | 0.14                                              | 0.20  | 0.33 | 0.50  | 0.86 |
| ÚA UNN     | 0.22                                              | 0.30  | 0.46 | 0.70  | 1.25 |
| All models | 0.06                                              | 0.09  | 0.18 | 0.38  | 0.61 |

5

**Table 10:** Percentiles of the probability distribution of the sea level contribution of Antarctica for different ice sheet models under the RCP-8.5 climate scenario. The 50% percentile corresponds to the median. The 16.6% - 83.3% is the so-called “likely range” as denoted in the IPCC reports. The “very likely range” is given by the 5% - 95% percentiles.

10

| Scenario | 5%   | 16.6% | 50%  | 83.3% | 95%  |
|----------|------|-------|------|-------|------|
| RCP-2.6  | 0.05 | 0.07  | 0.14 | 0.27  | 0.40 |
| RCP-4.5  | 0.05 | 0.08  | 0.15 | 0.31  | 0.47 |
| RCP-6.0  | 0.05 | 0.08  | 0.15 | 0.31  | 0.47 |
| RCP-8.5  | 0.06 | 0.09  | 0.18 | 0.38  | 0.61 |

**Table 11:** Sea level contributions from basal ice shelf melting from Antarctica within the 21<sup>st</sup> century from all models for the different emission scenarios in meters.

| Scenario | 5%  | 16.6% | 50% | 83.3% | 95%  |
|----------|-----|-------|-----|-------|------|
| RCP-2.6  | 0.8 | 1.2   | 2.2 | 4.2   | 6.3  |
| RCP-4.5  | 1.0 | 1.6   | 2.9 | 5.6   | 8.5  |
| RCP-6.0  | 1.1 | 1.7   | 3.1 | 6.1   | 9.2  |
| RCP-8.5  | 1.5 | 2.3   | 4.4 | 8.9   | 14.0 |

**Table 12:** Sea level rate contributions from basal ice shelf melting from Antarctica within the 21<sup>st</sup> century from all models for the different emission scenarios in mm per year or cm per decade.

| Scenario | 5%   | 16.6% | 50%  | 83.3% | 95%  |
|----------|------|-------|------|-------|------|
| RCP-2.6  | 0.01 | 0.02  | 0.05 | 0.10  | 0.16 |
| RCP-4.5  | 0.01 | 0.02  | 0.05 | 0.10  | 0.16 |
| RCP-6.0  | 0.01 | 0.02  | 0.05 | 0.10  | 0.16 |
| RCP-8.5  | 0.01 | 0.02  | 0.05 | 0.10  | 0.17 |

**Table 13:** Sea level contributions from basal ice shelf melting from Antarctica until the mid of the 21<sup>st</sup> century (years 2050) from all models for the different emission scenarios in meters. The projections are scenario independent until 2050 with the uncertainty of the forcing and across ice sheet models determining the uncertainty in the future.

| Scenario | 5%  | 16.6% | 50% | 83.3% | 95% |
|----------|-----|-------|-----|-------|-----|
| RCP-2.6  | 0.4 | 0.6   | 1.2 | 2.5   | 3.9 |
| RCP-4.5  | 0.4 | 0.7   | 1.3 | 2.7   | 4.3 |
| RCP-6.0  | 0.4 | 0.7   | 1.2 | 2.5   | 4.0 |
| RCP-8.5  | 0.4 | 0.7   | 1.4 | 3.0   | 4.9 |

**Table 14:** Sea level rate contributions from basal ice shelf melting from Antarctica until the mid of the 21<sup>st</sup> century (years 2050) from all models for the different emission scenarios in meters. Different from the sea level rise, the rate of sea level rise already depends on the scenario even in the first half of the century. Note that RCP-4.5, although it ends up lower in radiative forcing in the year 2100 it rises more quickly in the beginning of the century which leads to a slightly higher contribution of Antarctica to the rate of sea level rise until 2050 compared to RCP-6.0.

| Scenario | 5%   | 16.6% | 50%  | 83.3% | 95%  |
|----------|------|-------|------|-------|------|
| RCP-2.6  | 0.01 | 0.01  | 0.03 | 0.05  | 0.09 |
| RCP-4.5  | 0.01 | 0.01  | 0.03 | 0.06  | 0.09 |
| RCP-6.0  | 0.01 | 0.01  | 0.03 | 0.05  | 0.09 |
| RCP-8.5  | 0.01 | 0.01  | 0.03 | 0.06  | 0.10 |

**Table 15:** Sea level contributions from basal ice shelf melting from Antarctica between 2020 and 2050.
